# Supplementary material
Source: PubMed Central journal article supplement (PMC8792344)
Supplement: NIHMS1763787-supplement-Supplemental_Material.pdf [file NIHMS1763787-supplement-Supplemental_Material.pdf]

## Supplemental Materials

### Identification of Drug Transporter Genomic Variants and Inhibitors that Protect Against Doxorubicin–Induced Cardiotoxicity

**Running Title:** *Magdy et al.; Desipramine attenuates doxorubicin cardiotoxicity*

Tarek Magdy, PhD<sup>1,2</sup>, Mariam Jouni, PhD<sup>1,2</sup>, Hui–Hsuan Kuo, BS<sup>1,2</sup>, Carly J. Weddle, BS<sup>1,2</sup>,  
Davi Lyra–Leite, PhD<sup>1,2</sup>, Hananeh Fonoudi, PhD<sup>1,2</sup>, Marisol Romero–Tejeda, AB<sup>1,2</sup>,  
Mennat Gharib, BS<sup>1,2</sup>, Hoor Javed, BS<sup>1,2</sup>, Giovanni Fajardo, MD<sup>3</sup>, Colin J. D. Ross, PhD<sup>4,5</sup>,  
Bruce C. Carleton, PharmD<sup>4,6,7</sup>, Daniel Bernstein, MD<sup>3</sup>, and Paul W. Burridge, PhD<sup>1,2\*</sup>

<sup>1</sup>Department of Pharmacology, Northwestern University Feinberg School of Medicine, Chicago, IL. <sup>2</sup>Center for Pharmacogenomics, Northwestern University Feinberg School of Medicine, Chicago, IL. <sup>3</sup>Department of Pediatrics (Division of Cardiology), Stanford University School of Medicine, Stanford, CA. <sup>4</sup>British Columbia Children’s Hospital Research Institute, Vancouver, British Columbia, Canada. <sup>5</sup>Faculty of Pharmaceutical Sciences, University of British Columbia, Vancouver, British Columbia, Canada. <sup>6</sup>Division of Translational Therapeutics Department of Pediatrics, University of British Columbia, Vancouver, British Columbia, Canada.

<sup>7</sup>Pharmaceutical Outcomes Programme, British Columbia Children’s Hospital, Vancouver, British Columbia, Canada.

#### Address of Correspondence:

Paul Burridge, PhD,  
Assistant Professor, Department of Pharmacology  
Northwestern University Feinberg School of Medicine  
320 E Superior St, Searle 8-525, Chicago, IL 60611  
Email: paul.burridge@northwestern.edu

## Expanded Methods

**Human induced pluripotent cell derivation.** All pluripotent and reprogramming cell cultures were maintained at 37 °C in Heracell VIOS 160i humidified incubators (Thermo Scientific) with 5% CO<sub>2</sub> and 5% O<sub>2</sub>. Differentiation cultures were maintained at 5% CO<sub>2</sub> and atmospheric O<sub>2</sub>. Protocols were approved by the Northwestern University and University of British Columbia Institutional Review Boards. Patients had previously been genotyped with Illumina Infinium HumanOmniExpress array (738,432 SNPs). With informed written consent, ~9 ml of peripheral blood was taken from each volunteer and shipped at 4 °C, samples were transferred to LeucoSep tubes (Greiner) filled with Histopaque–1077 (Sigma).  $1 \times 10^6$  isolated peripheral blood mononuclear cells (PMBC) were grown in 24–well tissue culture–treated plates (Greiner) in 2 ml of SFEM II (Stem Cell Technologies) supplemented with 10 ng ml<sup>-1</sup> IL3, 50 ng ml<sup>-1</sup> SCF (KITLG), 40 ng ml<sup>-1</sup> IGF1 (all Peprotech), 2 U ml<sup>-1</sup> EPO, 1 μM dexamethasone (both Sigma)<sup>1</sup>. 50% medium was changed every other day. After 12 days of growth,  $6 \times 10^4$  cells were transferred to a well of a 24–well plate in 500 μl of SFEM II with growth factors supplemented with CytoTune–iPS 2.0 Sendai Reprogramming Kit viral particle factors (Invitrogen)<sup>2</sup> diluted to 10% of the manufacturer’s recommendations. Cells were treated with 3.5 μl, 3.5 μl, and 2.2 μl of hKOS ( $0.85 \times 10^8$  CIU ml<sup>-1</sup>), hMYC ( $0.85 \times 10^8$  CIU ml<sup>-1</sup>), and hKLF4 ( $0.82 \times 10^8$  CIU ml<sup>-1</sup>), respectively at MOI of 5:5:3 (KOS: MYC: KLF4). 100% media was changed after 24 h by centrifugation ( $300 \times g$  for 4 min) to 2 ml fresh SFEM II with growth factors, and cells were transferred to one well of a 6–well plate (Greiner) coated with 2 ml of 1:800 reduced growth factor Matrigel (Corning) diluted in DMEM (Corning). 50% medium was changed gently every other day. On d8 after transduction, 100% of medium was changed to B8 medium. B8 medium was

made in-house as previously described<sup>3</sup> and consisted of DMEM/F12 (10–092–CM, Corning), 5  $\mu\text{g ml}^{-1}$  *E. coli*-derived recombinant human insulin (Gibco), 200  $\mu\text{g ml}^{-1}$  L-ascorbic acid 2-phosphate trisodium salt (Wako), 5  $\mu\text{g ml}^{-1}$  *Oryza sativa*-derived recombinant human transferrin (Sigma), 20  $\text{ng ml}^{-1}$  sodium selenite (Sigma), 40  $\text{ng ml}^{-1}$  recombinant human FGF2 (154 amino acids, *E. coli*-derived, made in-house), 0.1  $\text{ng ml}^{-1}$  recombinant human TGF $\beta$ 3 (113 amino acid, *E. coli*-derived, Cell Guidance Systems), and 0.1  $\text{ng ml}^{-1}$  recombinant human NRG1 (65 amino acid, *E. coli*-derived, Peprotech). Medium was changed every day. At d17 individual colonies were picked in to a Matrigel-treated 12-well plate (one colony per well). Subsequently, cells were expanded in Matrigel-coated 6-well plates by passaging using 0.5 mM EDTA (Gibco) in DPBS without  $\text{Ca}^{2+}$  or  $\text{Mg}^{2+}$  (Corning) for 6 min at RT. Specific hiPSC clones used for this study were summarized in **Supplemental Table 2**. The genotypes for SNP rs7853758 were confirmed through *SLC28A3* gene sequencing in all hiPSC lines using Nanopore MinION sequencer.

**Human induced pluripotent stem cell culture.** Cells were routinely maintained in B8 medium (made as above) on 1:800 diluted growth factor reduced Matrigel. B8 was supplemented with 2  $\mu\text{M}$  Rho kinase inhibitor (thiazovivin) (LC Labs), hereby referred to as B8T, for the first 24 h after passage. Cells were passaged at a ratio of 1:15 every 3 days using 0.5 mM EDTA, achieving 75% confluence. Cell lines were used between passages 20 and 80. All cultures (pluripotent and differentiation) were maintained with 2 ml medium per 9.6  $\text{cm}^2$  of surface area or equivalent. All cultures were routinely tested for mycoplasma using a MycoAlert PLUS Kit (Lonza) and a Varioskan LUX (Thermo Scientific) plate reader.

**Karyotyping.** Genomic DNA was extracted from the cell pellets using a Quick-DNA Miniprep Plus kit (Zymo). SNP karyotyping was performed using a whole-genome Infinium

HumanCytoSNP-12 BeadChip Array (Illumina) covering 300,000 SNP using a NextSeq 500 (Illumina). Data was analyzed using BlueFuse Multi software (Illumina).

**CRISPR/Cas9-mediated gene knockout.** To generate *SLC28A3* knockout gRNA expression vectors, gRNA targeting the start codon designed an online CRISPR design tool (<http://tools.genome-engineering.org>) with minimal predicted off-target effect<sup>4</sup>. Each gRNA with BbsI ligation overhangs was annealed and inserted into the BbsI restriction site of a pSpCas9(BB)-2A-Puro (PX459) V2.0 (48138, Addgene) plasmid that expresses puromycin resistance gene for downstream antibiotic selection, in addition to Cas9. The constructed gRNA expression plasmids were confirmed by Sanger sequencing (Eurofins) with LKO1\_5\_primer (5'-GACTATCATATGCTTACCG-3'). 10<sup>6</sup> cells were electroporated with 5 µg PX459 plasmid using Neon™ Transfection System (Invitrogen) using electroporation parameters, 1400 V, 20 ms, and 2 pulses. Positive clones were selected 24 h post transfection using puromycin (0.5 µg ml<sup>-1</sup>) treatment for 48 h. Indels introduced by Cas9 were confirmed by sanger sequencing after PCR amplification of target region using forward primer (5'-AAACTGAAGCAAGCTGTGCC-3') and reverse primer (5'-TTTGTCAACCCAGAAGAGCCC-3')

**CRISPR/Cas9-mediated gene overexpression.** To generate *SLC28A3* overexpressing cells, *SLC28A* cDNA (Mammalian Genome Collection (MGC) Human *SLC28A3* Sequence-Verified cDNA (insert sequence, BC09382; CloneId,7939666, Catalog number, MHS6278-202857241, Dharmacon) was first amplified and cloned into pENTR/D-TOPO® (Invetrogen) by TOPO cloning reaction performed according to the manufacturer protocol. *SLC28A3* overexpression donor plasmid was generated by inserting *SLC28A3* cDNA under the CAG promoter of a

pAAVS1–Nst–CAG–DEST gateway cloning vector (80489, Addgene), which has a neomycin selection cassette in addition to homology arms for *AAVS1*, using Gateway LR Clonase II Enzyme Mix (Invitrogen). The constructed *SLC28A3* donor plasmid was confirmed by Sanger sequencing with the following primer set: P3–F (5'–GGCGCCGGCAGGAAGGAAAT–3') and P3–R (5'–AGCCAGGGCATTGGCCACAC–3'). *AAVS1* gRNA expression vector<sup>5</sup> (pXAT2, Addgene 80494), which expresses gRNA and Cas9, was used to target *AAVS1* locus in the first intron of the *PPP1R12C* gene<sup>5</sup>. Cells were then electroporated (as mentioned above) with 1 µg AAVS1 targeting plasmid and 3 µg SLC28A3 overexpression donor plasmid. Positive clones were selected using neomycin (100 µg ml<sup>-1</sup>) treatment for 14 days.

**Cardiac differentiation.** Differentiation into cardiomyocytes was performed according to previously described protocol with some modifications (**Supplemental Fig. 3a**)<sup>6,7</sup>. All cell lines for each individual experiment were differentiated in parallel to further reduce experimental variability. Briefly, hiPSCs were split at 1:15 ratios using 0.5 mM EDTA as above and grown in B8 medium for 3 days reaching 75% confluence. At the start of differentiation (day 0), B8 medium was changed to R6C<sup>6</sup>, consisting of RPMI 1640 (Corning) and 6 µM of the glycogen synthase kinase 3–β inhibitor CHIR99021 (LC Labs). On day 1, medium was changed to RPMI 1640 only and on day 2 medium was changed to RBA consisting of RPMI, 2 mg ml<sup>-1</sup> fatty acid-free albumin (GenDEPOT) and 200 µg ml<sup>-1</sup> L–ascorbic acid 2–phosphate (Wako) supplemented with 0.5 µM of the Wnt inhibitor Wnt–C59 (Biorbyt). Medium was then changed on day 4 to RBAI consisting of 0.5 mg ml<sup>-1</sup> fatty acid-free albumin, 200 µg ml<sup>-1</sup> L–ascorbic acid 2–phosphate, and 5 µg ml<sup>-1</sup> insulin (Gibco). Medium was then changed every other day with RBAI. Contracting cells were noted from day 7. For each hiPSC line, we added a *TNNT2* promotor-driven neomycin resistant cassette

targeted to the AAVS1 locus<sup>5</sup> to guarantee cardiomyocyte purity to >80% TNNT2<sup>+</sup>. On day 8-12, cells were selected with 100 µg/ml G418/geneticin (Gibco). On day 16, cardiomyocytes were dissociated using DPBS for 20 min at 37 °C followed by 1:200 Liberase TH (Roche) in DPBS for 20 min at 37 °C, manually triturated, centrifuged at 300 g for 5 min, filtered through a 100 µm cell strainer (Falcon). Live cells were counted using a LUNA-FL Dual Fluorescence cell counter (Logos Biosystems) then plated onto Matrigel-treated Nunc Lab-Tek II 8-chamber slides (50,000 cells per well), No 1.5 coverslips (100,000 cells per coverslip) in 12-well plates, 24-well plates (1 × 10<sup>6</sup> cells per well), or 384-well white-sided µClear plates (50,000 cells per well) (all Greiner), in RBAI medium supplemented with 10% Cosmic Calf Serum (U.S. Origin, Hyclone) for 48 h and changed back to RBAI medium thereafter. Cardiomyocytes were used for analysis 30 days after differentiation.

**Immunofluorescent staining.** Cardiomyocytes were dissociated with Liberase TH and plated onto Matrigel-coated No 1.5 coverslips as described previously and allowed to adhere and spread for 4 days. Cells were fixed with 4% paraformaldehyde (Electron Microscopy Services) in DPBS for 15 min at RT, permeabilized with 10 mg ml<sup>-1</sup> (1%) saponin (Sigma) in DPBS for 15 min at RT, blocked with 30 mg ml<sup>-1</sup> (3%) bovine serum albumin (BSA, Sigma) and saponin in DPBS for 30 min at RT, and stained for 3 h in 3% BSA/1% saponin/DPBS at RT with 1:200 polyclonal rabbit IgG TNNT2 (Abcam, ab45932), 1:500 monoclonal mouse IgG<sub>1</sub> ACTN2 (Sigma, A7811), 1:200 polyclonal rabbit IgG SLC28A3 (Origene, TA337177). Cells were washed three times in 1% saponin/DPBS and then stained with secondary antibodies 1:250 Alexa Fluor 488 goat anti-rabbit IgG, Alexa Fluor 594 goat anti-mouse IgG<sub>1</sub>, or Alexa Fluor 488 goat anti-mouse IgG<sub>1</sub>, Alexa Fluor 594 goat anti-rabbit IgG (all Invitrogen) in 3% BSA/1% saponin/DPBS for 1 h at RT

in the dark. Cells were washed three times with 1% saponin/DPBS, with NucBlue (Invitrogen) in the last wash for 20 min and mounted with ProLong Diamond Antifade Mountant (Invitrogen). Slides were imaged with a Ti-E inverted fluorescent microscope (Nikon Instruments) and a Zyla sCMOS camera (Andor) using NIS-Elements 4.4 Advanced software.

**Flow cytometry.** hiPSCs were dissociated with TrypLE Express (Gibco) for 3 min at RT and  $1 \times 10^6$  cells were transferred to flow cytometry tubes (Falcon). For staining of surface marker, cells were stained 5 mg ml<sup>-1</sup> (0.5%) BSA (Sigma) in DPBS using 1:20 mouse IgG<sub>3</sub> SSEA4-488 (BD Biosciences, 560308) for 30 min at RT then washed twice in DPBS by centrifugation. For intracellular staining, cells were fixed with 4% PFA for 20 min at RT, washed twice with DPBS, and permeabilized with 1% saponin for 15 min at RT, and stained using 1:20 mouse IgG<sub>1</sub> POU5F1-647 (BD Biosciences, 560307), and mouse IgG<sub>1</sub> NANOG-647 (BD Biosciences, 561300) for 30 min at RT then washed. Isotype controls mouse IgG<sub>3</sub>-488 (BD Biosciences, 563636) and mouse IgG<sub>1</sub>-647 (BD Biosciences, 565571) were used to establish gating. Cardiomyocytes were dissociated with Liberase TH as described above, fixed and permeabilized as above, and stained using 1:100 mouse monoclonal IgG<sub>1</sub> TNNT2-647 (BD Biosciences, 565744) for 30 min at RT and washed again. Isotype controls mouse IgG<sub>1</sub>-647 (BD Biosciences, 565571) were used to establish gating. Primary human dermal fibroblasts showed no staining under these conditions. All cells were analyzed using a CytoFLEX (Beckman Coulter) with CytExpert 2.0 software. To account for autofluorescence, each and every sample had a negative untreated control for which the fluorescence is measured before DOX treatment. Exemplary flow cytometry plots for DOX uptake in hiPSC-CMs is shown in Supplemental Figure 11.

**Flow cytometry–based doxorubicin uptake quantification.** On day 14, cardiomyocytes were dissociated and then plated on 12-well plate ( $2 \times 10^6$  per well). On day 30, cells were treated for 24 h with either tested drugs in relevant concentration or RPMI 1640 medium (no phenol red, Corning) supplemented with  $500 \mu\text{g ml}^{-1}$  recombinant human serum albumin (Oryzogen) as negative control (**Supplemental Figure 4**). Cells were then treated with either doxorubicin (1 and 3  $\mu\text{M}$ ) alone or in combination with tested drugs in relevant concentrations. Cells auto-fluorescence was assayed before doxorubicin treatment and serves as baseline fluorescence. Doxorubicin intrinsic fluorescence-PE was measured 1 and 3 h post doxorubicin treatment and normalized to baseline fluorescence. All cells were stained with NucRed Live ReadyProbes Reagent (Invitrogen) to monitor cell viability.

**Doxorubicin treatment.** Doxorubicin hydrochloride (HY-15142, MedChem Express) was resuspended to 10 mM in cell culture–grade water (Corning). Day 30 hiPSC–CMs were treated for 24 h or 72 h with doxorubicin (0.01–100  $\mu\text{M}$ ) diluted in RPMI 1640 medium (no phenol red, Corning) supplemented with  $500 \mu\text{g ml}^{-1}$  recombinant human serum albumin (Oryzogen). For SLC transporter modulator drug screening, day 30 hiPSC–CMs were treated with respective drug 24 h prior to doxorubicin administration and then a second dose was co-administered with doxorubicin as above.

**384–well plate–based cell viability, caspase 3/7 activity assays.** To measure cell viability after 72 h of doxorubicin (0.01–100  $\mu\text{M}$ ) treatment, CellTiter–Glo 2.0 (Promega) was used per manufacturer’s instructions. Luminescence was measured using a VarioSkan Lux Multi–Mode Reader (Thermo Scientific) with an integration time of 0.25 sec. Apoptosis was measured using

Caspase 3/7–Glo (Promega) respectively according to manufacturer’s instructions with an integration time of 1 sec. 10  $\mu$ M staurosporine (MedChemExpress) was used as a positive control. Data were analyzed using Prism 7.0 software (GraphPad) using standard dose–response guidelines.

**RNA–seq gene expression.** RNA was extracted using a TRI reagent and Direct–zol RNA microprep kit (Zymo) including on-column DNase digestion to remove genomic DNA. Samples were quantified using an Agilent 2100 Bioanalyzer and passed QC. Forward stranded library preparation was done after ribosomal RNA depletion and sequencing with DNBseq platform sequencing (BGI), generating ~90 million paired-end 100 bp reads for each sample. Reads were mapped to the GRCh38 reference human genome using HISAT2<sup>8</sup>. Gene expression levels and exon usage were estimated using featureCounts function in the Subread software<sup>9</sup>. Differential gene expression analysis was done using DEseq2 package<sup>10</sup> and R (v3.3.3). Bioinformatics script and codes for the analysis are available upon request.

**Quantitative Real–time PCR.** RNA was isolated using a TRI reagent and Direct–zol RNA microprep kit (Zymo) including on-column DNase digestion to remove genomic DNA. cDNA was produced from 1  $\mu$ g of total RNA using the High Capacity RNA–to–cDNA kit (Applied Biosystems). All PCR reactions were performed in triplicate in a 384–well plate format using TaqMan Gene Expression Master Mix in a QuantStudio 5 Real–Time PCR System (both Applied Biosystems) with following TaqMan Gene Expression Assays (Applied Biosystems): 18S (Hs99999901\_s1), *NANOG* (Hs02387400\_g1), *POU5F1* (Hs00999632\_g1), *SOX2* (Hs01053049\_s1), *KLF4* (Hs00358836\_m1), *LIN28* (Hs00702808\_s1), *MYC* (Hs00153408\_m1),

*UTF1* (Hs00747497\_g1), *DNMT3B* (Hs01003405\_m1), *TERT* (Hs99999022\_m1), *TP53* (Hs99999147\_m1), *SLC28A3* (hs00910439\_m1). Relative quantification of gene expression was calculated using  $2^{-\Delta\Delta C_t}$  method<sup>11</sup>, normalized to the reference 18S and untreated control samples as specified in the figure legends.

**Western blot.** Cells were washed twice with DPBS, then the supernatant was aspirated, and the cell pellets were flash frozen. Cells were lysed with lysis buffer (150 mM NaCl, 1% Triton X-100, protease inhibitor and 50 mM Tris-HCl, pH 8.0). Cell protein was isolated by centrifugation at 4 °C for 15 minutes at 15,000 rpm. Protein was quantified using Bradford assay (IBI scientific). 20–50 µg of protein was reduced and denatured in LDS sample buffer and reducing agent (Invitrogen) at 37 °C for 20 min, loaded onto the precast NuPage 10% Bis-Tris gel (Invitrogen) and run for 35 min at 200 V. Transfer to the nitrocellulose membrane (GE Healthcare) was performed at 10 V for 90 min. The membrane was blocked for 1 h at RT in the blocking buffer (5% BSA diluted with TBST) and incubated with 1:200 polyclonal rabbit SLC28A3 (Santa Cruz, sc134529), and 1:2000 monoclonal mouse IgG<sub>2a</sub> β-Tubulin (Invitrogen, MA5-16308) at 4 °C overnight. The membrane was then washed three times with TBST and incubated with 1:2000 HRP-goat anti-mouse IgG or HRP-goat anti-rabbit IgG (both Invitrogen) for 1 h at RT. The membrane was washed three times with TBST and incubated with Chemiluminescent substrate for quantitative chemiluminescent Westerns (Azure Biosystems) according to the manufacturer's recommendation. The chemiluminescent signals were captured using a CCD camera-based imager (Azure Biosystems).

**Breast cancer cell lines.** Four human breast cancer cell lines were used, MCF7 (adenocarcinoma, ATCC HTB-22) and Hs 578T (carcinsarcoma, ATCC HTB-126) both cultured in RPMI 1640

(Hyclone) with 10% FBS (Seradigm), MDA-MB-231 (adenocarcinoma, ATCC HTB-26) and MDA-MB-468 (adenocarcinoma, ATCC HTB-131) both cultured in DMEM (Corning) with 10% FBS. All cells were cultured on uncoated tissue culture plates and passaged with TrypLE Express (Gibco).

***SLC28A3* candidate gene resequencing using MinION Nanopore sequencer.**

**DNA extraction and purification.** DNA was isolated from six patient derived human induced pluripotent stem cells, using QuickExtract DNA Extraction Solution (Epicenter) according to manufacturer protocol. Isolated DNA was then purified using Genomic DNA Clean & Concentrator-10 (Zymo) according to manufacturer protocol.

***SLC28A3* locus amplification and amplicons validation.** ~77 kb located on Chr9: 84,291,953-84,368,534 (NC\_000009.12, GRCh38.p7) encompassing the coding region of *SLC28A3* gene in addition to 9 kb and 5 kb at the 5'UTR and 3'UTR, respectively was amplified using long range PCR. A set of primer pairs were designed to amplify nine overlapping amplicons covering the target region whereas, length of amplicons ranged between 5732 and 9908 bp (**Supplemental Table 3**). Generation of overlapping amplicons help compensate for the low depth of coverage associated with the start and the end of each sequence read. Using ~200 ng of DNA per reaction, amplicons were amplified using PrimeSTAR GXL DNA Polymerase (Takara) via three steps-PCR. PCR reaction mixture components and cycling conditions are mentioned in **Supplemental material online, Table S4**. Generated amplicons were then purified using Genomic DNA Clean & Concentrator-5 (Zymo research) according to the manufacturer protocol to get rid of

contaminants that might damage the pores of the Nanopore flow cell, which leads to a significant decrease in the number of sequence reads.

**Amplicon validation prior sequencing.** PCR product (amplicons) were run on 1% agarose gel and visualized by staining with GelGreen Nucleic Acid Stain (Biotium) (**Figure 1**). Gel bands equivalent to target amplicons were confirmed for all amplified amplicons. For further confirmation that we got the correct amplicons, about 1 kb of the start and the end of each purified amplicon were then Sanger sequenced, and *in silico* aligned to its corresponding reference sequence. The quality and concentration of generated amplicons was assessed using NanoDrop 8000 and Qubit 3.0 fluorometer, respectively (**Supplemental Table 3**). It is important to generate amplicons with reasonable purity to avoid ruining the pores of the flow cell which decreases the number of generated sequencing reads. Thus, amplicons with 260/280 and 260/230 of less than 1.8 and 1.5 were excluded and regenerated (**Supplemental Table 5**).

**MinION library preparation and flow cell loading.** Library preparation was done using ligation sequencing (Oxford, Nanopore, SQK-LSK108) and 1D Native barcoding (Oxford, Nanopore, EXP-NBD103) kits. Nine amplicons from relevant patients were pooled together in an equimolar amount. Amplicons were then repaired using NEBNext FFPE Repair Mix (New England Biolabs, M6630) to maximize the read length by adding 1mg DNA to 8.5 ml nuclease free water, 6.5 ml FFPE repair buffer, and 2 ml FFPE Repair. The reaction mix was then cleaned adding 62 ml AMPure XP beads (Beckman Coulter, A63880), DNA was then incubated on a hula mixer at room temperature for 5 min, spun down, and pelleted on a magnet, washed twice with 200 ml freshly prepared 70% ethanol. Samples were spun down again, placed back on a magnet, left to dry for ~ 30

sec. DNA was then removed from the magnet, re-suspended in 46 ml nucleases free water, incubated for 2 min at room temperature, and re-placed on a magnet until the elute is clear. Finally, 46 ml of clear elute was transferred to 1.5 ml Eppendorf DNA LoBind tube. End-repair and dA-tailing was then performed using NEBNext End repair / dA-tailing Module (New England Biolabs, E7546). Reaction mix was prepared by adding 45 ml eluted DNA to 7 ml Ultra II End-prep reaction buffer, 10 ml Ultra II End-prep enzyme mix, and 5 ml nuclease-free water. Reaction mix was then incubated for 5 min at 20 °C followed by 5 min at 65 °C. DNA was then purified using AMPure XP beads (see above). Finally, 25 ml clear elute was transferred into DNA LoBind tube. Each sample was barcoded using 1D Native barcoding (Oxford, Nanopore, EXP-NBD103), 2.5 ml native Barcode was added to 22.5 ml end-prepped DNA, and 25 ml Blunt/TA Ligase Master Mix (New England Biolabs, M0367). Reaction mix was then incubated for 10 min at room temperature, DNA was then purified using AMPure XP beads (see above), and 26 ml of clear elute was transferred into Eppendorf DNA LoBind tube.

Barcoded samples were pooled in an equimolar amount to a final concentration of 700 ng, then diluted by adding 24 ml nuclease free water. Adapter ligation was then performed using NEBNext Quick Ligation Module (New England Biolabs, E6056). 700 ng pooled DNA was mixed with 20 ml Barcode Adapter Mix, 20 ml NEBNext Quick Ligation Reaction Buffer, and 10 ml Quick T4 DNA Ligase. Reaction mix was then incubated for 10 min at room temperature, and DNA was then purified by adding 62 ml AMPure XP beads (Beckman Coulter, A63880), incubated on a hula mixer at room temperature for 5 min, spun down, and pelleted on a magnet, and Supernatant was discarded. Beads were then resuspended in 140 ml Adapter Bead Buffer (ABB) by flicking the tube, pelted on magnet, and supernatant was discarded (resuspension step was repeated). Pellet was resuspended in 15 ml Elution Buffer, incubated for 10 min at room

temperature, pellet on magnet until the elute is clear, and finally 15 ml clear elute was transferred into Eppendorf DNA LoBind tube.

Priming mix was prepared by adding 576 µl RBF to 624 µl nuclease-free water, then 800 µl priming mix was loaded on the flow cell using priming port dropwise to avoid the introduction of air bubbles. Five minutes later, SpotON sample cover on MinION was opened and 200 µl priming mix was loaded. DNA library was prepared for loading by adding 12 µl DNA library to 35 µl RBF, 25.5 µl LLB, and 2.5 µl nuclease-free water. DNA library was gently mixed, loaded on the flow cell (FLO-MIN 106 R9 version, FAF19356) through SpotON port. Library was then sequenced for 48 hours with live base-calling.

**Raw sequencing data and SNPs functional analysis.** Raw barcoded sequence reads were demultiplexed into six fastq files using Porechop<sup>12</sup>. Quality of demultiplexed sequence reads were assessed using Nanopack<sup>13</sup>. Sequence reads were then aligned to reference human genome (GRCh38.p92) using minimap2<sup>14</sup> “-ax map-ont”, sam files were then sorted and converted into bam files using SAMtools<sup>15</sup>. Bam files were down-sampled using SAMtools “-s 0.1 to -s 0.9”, and the quality of aligned reads were assessed using Nanopack. Depth of coverage analysis was done using deepTools2<sup>16</sup>. Sequence reads were indexed and variants were called using Nanopolish<sup>17</sup>. Variant call format files containing called SNPs were processed and analyzed using several tools including VCFtools<sup>18</sup>, SnpSift<sup>19</sup>, and BCFtools<sup>20</sup>. SNPs functional annotation analysis was done using DeepSEA<sup>21</sup>, R (RCoreTeam) and BiomaRt<sup>22</sup> Bioconductor package that includes multiple ensemble gene regulation database. Conservation analysis was done using SnpSift<sup>19</sup> and PhastCons dataset that includes genome-wide multiple alignments with other 99 vertebrate species. (<http://hgdownload.cse.ucsc.edu/goldenpath/hg38/phastCons100way>)

**Editing of the causal variant, rs11140490 in hiPSC derived from study patients.** Locus-specific base-editor protein complex and the gRNA were designed using Beditor <sup>23</sup>, and the designed gRNA was cloned in the gRNA expressing plasmid (73797, Addgene). Then 1 x 10<sup>6</sup> cells were electroporated with 4 µg of the base editor expressing plasmid (pSI-Target-AID-NG, 119861, Addgene) and 4 µg of the gRNA expressing plasmid (lenti sgRNA (MS2) \_puro, 73797, Addgene). Cells were then selected with 0.3 µg/ml puromycin 24 h post transfection for 48 h, clones were picked, the target locus was PCR-amplified and sanger-sequenced to confirm the SNP editing in all clones.

**SLC28A3-AS1 overexpression in isogenic hiPSCs.** The *SLC28A3-AS1* cDNA was cloned into pLenti-C-Myc-DDK-IRES-Puro lentiviral vector (Origene) which was then co-transfected with packaging plasmids psPAX2 (Addgene 12260) and pMD2.G (Addgene 12259) into Lenti-X 293T cells (Takara) to generate lentivirus. Virus-containing supernatant was collected at 48- and 72-hours post-transfection. Lentivirus was concentrated 1:100 from cleared supernatant using PEG-iT (SBI). Isogenic hiPSCs were then transduced and positive clones were selected with puromycin for seven days to generate ISO<sup>*SLC28A3-AS1*</sup>. *SLC28A3-AS1* overexpression was confirmed using stranded RNA-Seq after ribosomal RNA depletion.

**Mouse model of doxorubicin-induced cardiomyopathy and drug administration.** C57BL/6J 10 weeks old male mice were co-treated with doxorubicin (NovaPlus) and water as a control vehicle ( $n = 100$ ), or with desipramine (Sigma) as experimental groups ( $n = 8$ ). At day 0, mice were treated with doxorubicin (3 mg kg<sup>-1</sup>) intraperitoneally twice a week alone or with desipramine

by Alzet pump infusion ( $20 \text{ mg kg}^{-1} \text{ day}^{-1}$ ) for 3 weeks (day 0–day 21). For the control group, we treated mice with corn oil in the same schedule as desipramine administration. We recorded an echocardiogram once a week (day 0, day 7, day 14, and day 21) and terminated the experiment at day 21.

**Echocardiographic evaluation.** Mice were studied at baseline and weekly during the protocol under light anesthesia with isoflurane (induction 3%, maintenance 1.5%). 2D images in the parasternal short axis were obtained with a GE Vivid 7 ultrasound system (GE Healthcare) equipped with a 13 MHz transducer. Left ventricular end-systolic (LVESD) and end-diastolic (LVEDD) dimensions were measured and left ventricular fractional shortening (FS) was calculated.

**Statistical methods.** Data were analyzed in R version 4.0.3 and graphed in GraphPad Prism 6. Detailed statistical information is included in the corresponding figure legends. Data were presented as mean  $\pm$  SEM. Comparisons were conducted via one way-ANOVA test, or an unpaired two-tailed Student's t-test with significant differences defined as  $P < 0.05$  (\*),  $P < 0.01$  (\*\*),  $P < 0.001$  (\*\*\*), and  $P < 0.0001$  (\*\*\*\*). Our sample size (3 patients in each category) was based on the feasibility of handling this number of hiPSC lines. For dose response curves, log-logistic non-linear regression model was used to estimate the value of the four parameters, and t-statistic was used to test for significant difference in LD<sub>50</sub> between different groups using “drc” package<sup>24</sup> in R. Patient exclusion criteria are outlined in **Supplemental Table 1**. No statistical methods were used to predetermine sample size. The experiments were not randomized, and the investigators were not blinded to allocation during experiments and outcome assessment.

**Supplemental Table 1: Inclusion and exclusion criteria**

| Inclusion Criteria                                                                                                            | Exclusion Criteria                                                                               |
|-------------------------------------------------------------------------------------------------------------------------------|--------------------------------------------------------------------------------------------------|
| Diagnosis of cancer                                                                                                           | Patients who have not been treated with doxorubicin                                              |
| Treatment with doxorubicin (Adriamycin)                                                                                       | Unwilling to consent/assent to $\leq 15$ ml blood draw ( $\leq 5$ ml for children under 5 years) |
| Age $< 21$ years at time treatment                                                                                            |                                                                                                  |
| Must have previously participated in the research of CPNDS                                                                    |                                                                                                  |
| Must be European ancestry                                                                                                     |                                                                                                  |
| Documentation of pre-chemotherapy shortening fraction of $\geq 30\%$                                                          |                                                                                                  |
| For DIC patients only: SF of $\leq 26\%$ . Only echocardiograms $\geq 21$ days after a doxorubicin dose are to be considered. |                                                                                                  |
| For control patients: SF of $\geq 30\%$ and no symptoms of cardiac compromise for at least 5 years after treatment            |                                                                                                  |

Date provided by the Canadian Pharmacogenomics Network of Drug Safety (CPNDS); SF, shortening fraction

**Supplemental Table 2: Doxorubicin-treated patients recruited in this study**

| ID                         | Anthracycline | Cardiotoxicity | Gender | Age at Treatment | Cancer diagnosis | Heart radiation | rs7853758 genotype |
|----------------------------|---------------|----------------|--------|------------------|------------------|-----------------|--------------------|
| <i>SLC</i> <sup>ref1</sup> | Yes           | Yes            | Male   | 5.1              | Wilm's Tumor     | Yes             | GG                 |
| <i>SLC</i> <sup>ref2</sup> | Yes           | Yes            | Male   | 1.6              | ALL              | No              | GG                 |
| <i>SLC</i> <sup>ref3</sup> | Yes           | Yes            | Female | 4.3              | ALL              | No              | GG                 |
| <i>SLC</i> <sup>var1</sup> | Yes           | No             | Female | 2.7              | ALL              | No              | AG                 |
| <i>SLC</i> <sup>var2</sup> | Yes           | No             | Female | 2.2              | ALL              | No              | AG                 |
| <i>SLC</i> <sup>var3</sup> | Yes           | No             | Male   | 1.6              | ALL              | No              | AG                 |
| ISO                        | No            | NA             | Male   | NA               | NA               | No              | GG                 |

Heart radiation therapy includes significant radiation exposure to the heart or surrounding tissue. This includes mantle and mediastinal radiation, whole-lung radiation, whole-abdomen or upper abdominal radiation, left-side flank radiation and total-body irradiation. SF, shortening fraction; NA, not applicable. ISO is the control hiPSC line used to generate knockout and overexpression lines.

**Supplemental Table 3: primers for *SLC28A3* amplicons amplification**

| Primer ID | Sequence 5'>3'          | Direction | Amplicon length (bp) |
|-----------|-------------------------|-----------|----------------------|
| Amp 1 fw  | AGTTGCATGTTGCCATTCTG    | Forward   | 9218                 |
| Amp 1 rv  | GTTGCTGTAGCCCTCAGCTC    | Reverse   |                      |
| Amp 2 fw  | CTCCCCAGGAGTGCAAATAG    | Forward   | 9908                 |
| Amp 2 rv  | TCAAGGGGAATCACTTCAGG    | Reverse   |                      |
| Amp 3 fw  | TCAAGTTTGCATGATCACACC   | Forward   | 8979                 |
| Amp 3 rv  | CAGGAAATATGGCTTCAGCTC   | Reverse   |                      |
| Amp 4 fw  | AAGGAAGATCCACGTTGTG     | Forward   | 9286                 |
| Amp 4 rv  | AAGTGATGCTTCCCATCAGG    | Reverse   |                      |
| Amp 5 fw  | GCTGTTTGTGTAATCGGATG    | Forward   | 9306                 |
| Amp 5 rv  | TCCAAGTGTCTGAGCACCAG    | Reverse   |                      |
| Amp 6 fw  | TGTTGCAGGTGTTTGGAAAG    | Forward   | 5732                 |
| Amp 6 rv  | ACATTATGAGCCCACCGAAG    | Reverse   |                      |
| Amp 7 fw  | CGGCCGCTGGTGAGGTCCCCCAA | Forward   | 8668                 |
| Amp 7 rv  | TGGGCAGTGGTGCTGGCAAGCGT | Reverse   |                      |
| Amp 8 fw  | TTGGCAATGTCCGGATTC      | Forward   | 9420                 |
| Amp 8 rv  | TTCCCCTTTCCAGGGATAAC    | Reverse   |                      |
| Amp 9 fw  | GGACCTCTTCTCCCTGGAAC    | Forward   | 9509                 |
| Amp 9 rv  | AGACCCTAAGGCCTCTCCAG    | Reverse   |                      |

**Supplemental Table 4: PCR reaction mixture and conditions**

| <b>Amplicon</b>                  | <b>Composition of reaction mixture</b>                                                                                                                                                                                 | <b>PCR condition</b>                                                      |
|----------------------------------|------------------------------------------------------------------------------------------------------------------------------------------------------------------------------------------------------------------------|---------------------------------------------------------------------------|
| Amp1, Amp2, Amp4, Amp5, and Amp9 | 10 µl 5X PrimeSTAR GXL Buffer,<br>4 µl dNTP Mixture (2.5 mM each),<br>1 µl of 100 µM primer, 300 ng<br>DNA template, and 1 µl<br>PrimeSTAR GXL DNA<br>Polymerase 1.25 U/50 µl, and<br>Sterile distilled water to 50 µl | 30 cycles<br>98 °C 10 sec<br>60 °C 15 sec<br>68 °C 10 min<br>Hold at 4 °C |
| Amp3, and Amp 8                  | 10 µl 5X PrimeSTAR GXL Buffer,<br>4 µl dNTP Mixture (2.5 mM each),<br>1 µl of 100 µM primer, 300 ng<br>DNA template, and 1 µl<br>PrimeSTAR GXL DNA<br>Polymerase 1.25 U/50, and Sterile<br>distilled water to 50 µl    | 30 cycles<br>98 °C 10 sec<br>58 °C 15 sec<br>68 °C 10 min<br>Hold at 4 °C |
| Amp6                             | 10 µl 5X PrimeSTAR GXL Buffer,<br>4 µl dNTP Mixture (2.5 mM each),<br>1 µl of 100 µM primer, 300 ng<br>DNA template, and 1 µl<br>PrimeSTAR GXL DNA<br>Polymerase 1.25 U/50, and Sterile<br>distilled water to 50 µl    | 30 cycles<br>98 °C 10 sec<br>60 °C 15 sec<br>68 °C 6 min<br>Hold at 4 °C  |
| Amp7                             | 10 µl 5X PrimeSTAR GXL Buffer,<br>4 µl dNTP Mixture (2.5 mM each),<br>1 µl of 100 µM primer, 300 ng<br>DNA template, and 1 µl<br>PrimeSTAR GXL DNA<br>Polymerase 1.25 U/50, and Sterile<br>distilled water to 50 µl    | 30 cycles<br>98 °C 10 sec<br>66 °C 15 sec<br>68 °C 6 min<br>Hold at 4 °C  |

**Supplemental Table 5: Quality assessment of *SLC28A3* amplicons**

| Sample ID                  | Amplicon | Conc (ng/μl) | A260  | A280  | 260/280 | 260/230 |
|----------------------------|----------|--------------|-------|-------|---------|---------|
| <i>SLC</i> <sup>ref1</sup> | Amp01    | 117.2        | 2.344 | 1.232 | 1.9     | 1.72    |
|                            | Amp02    | 7.525        | 0.15  | 0.095 | 1.58    | 1.69    |
|                            | Amp03    | 74.43        | 1.489 | 0.771 | 1.93    | 1.73    |
|                            | Amp04    | 48.37        | 0.967 | 0.514 | 1.88    | 2.08    |
|                            | Amp05    | 128.3        | 2.566 | 1.342 | 1.91    | 1.94    |
|                            | Amp06    | 59.79        | 1.196 | 0.649 | 1.84    | 1.62    |
|                            | Amp07    | 90.3         | 1.806 | 0.971 | 1.86    | 1.69    |
|                            | Amp08    | 7.217        | 0.144 | 0.074 | 1.95    | 1.52    |
|                            | Amp09    | 146.8        | 2.936 | 1.546 | 1.9     | 2.13    |
| <i>SLC</i> <sup>ref2</sup> | Amp01    | 148.3        | 2.967 | 1.57  | 1.89    | 2.14    |
|                            | Amp02    | 80.62        | 1.612 | 0.88  | 1.83    | 1.72    |
|                            | Amp03    | 51.97        | 1.039 | 0.549 | 1.89    | 1.75    |
|                            | Amp04    | 107.7        | 2.154 | 1.142 | 1.89    | 1.96    |
|                            | Amp05    | 98.96        | 1.979 | 1.06  | 1.87    | 1.95    |
|                            | Amp06    | 122.6        | 2.453 | 1.288 | 1.9     | 1.94    |
|                            | Amp07    | 103.4        | 2.069 | 1.123 | 1.84    | 1.88    |
|                            | Amp08    | 19.44        | 0.389 | 0.217 | 1.79    | 2.04    |
|                            | Amp09    | 81.35        | 1.627 | 0.855 | 1.9     | 2.02    |
| <i>SLC</i> <sup>ref3</sup> | Amp01    | 96.78        | 1.936 | 1.016 | 1.91    | 2.09    |
|                            | Amp02    | 60.44        | 1.209 | 0.672 | 1.8     | 1.57    |
|                            | Amp03    | 73.76        | 1.475 | 0.796 | 1.85    | 1.72    |
|                            | Amp04    | 134.1        | 2.681 | 1.424 | 1.88    | 2.07    |
|                            | Amp05    | 84.22        | 1.684 | 0.887 | 1.9     | 1.92    |
|                            | Amp06    | 41.24        | 0.825 | 0.439 | 1.88    | 1.86    |
|                            | Amp07    | 104.5        | 2.089 | 1.095 | 1.91    | 2.11    |
|                            | Amp08    | 45.57        | 0.911 | 0.496 | 1.84    | 1.79    |
|                            | Amp09    | 73.19        | 1.464 | 0.81  | 1.81    | 1.67    |
| <i>SLC</i> <sup>var1</sup> | Amp01    | 120.1        | 2.403 | 1.284 | 1.87    | 2.07    |
|                            | Amp02    | 40.18        | 0.804 | 0.449 | 1.79    | 1.61    |
|                            | Amp03    | 58.98        | 1.18  | 0.631 | 1.87    | 1.8     |
|                            | Amp04    | 91.2         | 1.824 | 0.973 | 1.87    | 1.92    |
|                            | Amp05    | 114.6        | 2.293 | 1.241 | 1.85    | 1.72    |
|                            | Amp06    | 93.09        | 1.862 | 0.979 | 1.9     | 2.01    |
|                            | Amp07    | 106.4        | 2.128 | 1.11  | 1.92    | 1.77    |
|                            | Amp08    | 64.44        | 1.289 | 0.711 | 1.81    | 1.91    |
|                            | Amp09    | 61.63        | 1.233 | 0.651 | 1.89    | 2.08    |
| <i>SLC</i> <sup>var2</sup> | Amp01    | 147          | 2.94  | 1.551 | 1.9     | 1.79    |
|                            | Amp02    | 38.41        | 0.768 | 0.405 | 1.9     | 1.78    |
|                            | Amp03    | 35.4         | 0.708 | 0.387 | 1.83    | 1.56    |
|                            | Amp04    | 155.2        | 3.105 | 1.664 | 1.87    | 1.91    |
|                            | Amp05    | 101.4        | 2.028 | 1.045 | 1.94    | 1.98    |
|                            | Amp06    | 46.66        | 0.933 | 0.494 | 1.89    | 1.88    |
|                            | Amp07    | 82.67        | 1.653 | 0.911 | 1.81    | 1.9     |
|                            | Amp08    | 14.07        | 0.281 | 0.15  | 1.88    | 1.81    |
|                            | Amp09    | 61.4         | 1.228 | 0.663 | 1.85    | 2.11    |
| <i>SLC</i> <sup>var3</sup> | Amp01    | 72.96        | 1.459 | 0.771 | 1.89    | 1.72    |
|                            | Amp02    | 116.3        | 2.327 | 1.246 | 1.87    | 2.13    |
|                            | Amp03    | 125.4        | 2.509 | 1.312 | 1.91    | 2.2     |

|  |       |       |       |       |      |      |
|--|-------|-------|-------|-------|------|------|
|  | Amp04 | 59.99 | 1.2   | 0.644 | 1.86 | 1.55 |
|  | Amp05 | 33.31 | 0.666 | 0.353 | 1.89 | 1.79 |
|  | Amp06 | 141.3 | 2.826 | 1.515 | 1.87 | 1.73 |
|  | Amp07 | 27.08 | 0.542 | 0.295 | 1.84 | 1.59 |
|  | Amp08 | 41.91 | 0.838 | 0.44  | 1.91 | 1.72 |
|  | Amp09 | 90.51 | 1.81  | 0.978 | 1.85 | 1.83 |

**Supplemental Table 6: Identified *SLC28A3* SNP genotypes across study samples**

| Position        | SNP Id            | REF      | ALT      | <i>SLC</i> <sup>ref1</sup> | <i>SLC</i> <sup>ref2</sup> | <i>SLC</i> <sup>ref3</sup> | <i>SLC</i> <sup>var1</sup> | <i>SLC</i> <sup>var2</sup> | <i>SLC</i> <sup>var3</sup> | Location      | AA alteration |
|-----------------|-------------------|----------|----------|----------------------------|----------------------------|----------------------------|----------------------------|----------------------------|----------------------------|---------------|---------------|
| 84273903        | rs1332538         | C        | T        | 0                          | 0                          | 0                          | 1                          | 1                          | 0                          | 3'-UTR        |               |
| <b>84274601</b> | <b>rs12003403</b> | G        | A        | 0                          | 0                          | 0                          | 1                          | 1                          | 1                          | 3'-UTR        |               |
| <b>84274729</b> | <b>rs12003423</b> | G        | A        | 0                          | 0                          | 0                          | 1                          | 1                          | 1                          | 3'-UTR        |               |
| <b>84275091</b> | <b>rs11140488</b> | A        | T        | 0                          | 0                          | 0                          | 1                          | 1                          | 1                          | 3'-UTR        |               |
| 84275843        | rs17426961        | C        | T        | 0                          | 1                          | 0                          | 0                          | 0                          | 0                          | 3'-UTR        |               |
| <b>84276016</b> | <b>rs11140489</b> | T        | A        | 0                          | 0                          | 0                          | 1                          | 1                          | 1                          | 3'-UTR        |               |
| 84276158        | NA                | C        | T        | 1                          | 1                          | 1                          | 1                          | 1                          | 1                          | 3'-UTR        |               |
| <b>84276679</b> | <b>rs10868133</b> | T        | C        | 0                          | 0                          | 0                          | 1                          | 1                          | 1                          | 3'-UTR        |               |
| 84276696        | rs1036176955      | C        | A        | 0                          | 0                          | 0                          | 0                          | 0                          | 1                          | 3'-UTR        |               |
| <b>84277372</b> | <b>rs4877272</b>  | G        | A        | 0                          | 0                          | 0                          | 1                          | 1                          | 1                          | 3'-UTR        |               |
| <b>84277979</b> | <b>rs3750406</b>  | A        | C        | 0                          | 0                          | 0                          | 1                          | 1                          | 1                          | 3'-UTR        |               |
| <b>84278156</b> | <b>rs7858075</b>  | <b>T</b> | <b>C</b> | <b>0</b>                   | <b>0</b>                   | <b>0</b>                   | <b>1</b>                   | <b>1</b>                   | <b>1</b>                   | <b>3'-UTR</b> |               |
| <b>84278398</b> | <b>rs11140490</b> | A        | G        | 0                          | 0                          | 0                          | 1                          | 1                          | 1                          | I17           |               |
| 84278763        | NA                | G        | A        | 1                          | 1                          | 1                          | 1                          | 1                          | 1                          | I17           |               |
| 84279527        | rs7862562         | T        | C        | 0                          | 1                          | 0                          | 1                          | 1                          | 1                          | I16           |               |
| 84279858        | rs1290966405      | C        | T        | 1                          | 0                          | 0                          | 0                          | 0                          | 1                          | I16           |               |
| <b>84280938</b> | <b>rs10868135</b> | T        | C        | 0                          | 0                          | 0                          | 1                          | 1                          | 1                          | I14           |               |
| 84282506        | NA                | C        | T        | 1                          | 0                          | 1                          | 1                          | 1                          | 1                          | I14           |               |
| 84283431        | rs973302715       | A        | G        | 0                          | 0                          | 0                          | 0                          | 1                          | 0                          | I14           |               |
| <b>84284969</b> | <b>rs4877831</b>  | C        | G        | 0                          | 0                          | 0                          | 1                          | 1                          | 1                          | I14           |               |
| 84285032        | rs4877832         | A        | C        | 0                          | 1                          | 0                          | 1                          | 1                          | 1                          | I14           |               |
| <b>84285101</b> | <b>rs4877833</b>  | T        | C        | 0                          | 0                          | 0                          | 1                          | 1                          | 1                          | I14           |               |
| 84285427        | NA                | G        | A        | 1                          | 1                          | 1                          | 1                          | 1                          | 1                          | E14           | A522V         |
| <b>84285698</b> | <b>rs7853066</b>  | A        | G        | 0                          | 0                          | 0                          | 1                          | 1                          | 1                          | I13           |               |
| <b>84286011</b> | <b>rs7853758</b>  | G        | A        | 0                          | 0                          | 0                          | 1                          | 1                          | 1                          | E13           | L489L         |
| 84286220        | rs937635656       | G        | A        | 0                          | 0                          | 0                          | 0                          | 0                          | 1                          | I12           |               |
| <b>84287089</b> | <b>rs7030019</b>  | A        | G        | 0                          | 0                          | 0                          | 1                          | 1                          | 1                          | I12           |               |
| 84288640        | NA                | G        | A        | 1                          | 0                          | 0                          | 0                          | 0                          | 0                          | I11           |               |
| 84289166        | NA                | G        | A        | 1                          | 1                          | 1                          | 1                          | 1                          | 1                          | I11           |               |
| <b>84290636</b> | <b>rs4877834</b>  | T        | C        | 0                          | 0                          | 0                          | 1                          | 1                          | 1                          | I10           |               |
| <b>84291093</b> | <b>rs7047315</b>  | A        | G        | 0                          | 0                          | 0                          | 1                          | 1                          | 1                          | I10           |               |
| <b>84291502</b> | <b>rs7047898</b>  | A        | C        | 0                          | 0                          | 0                          | 1                          | 1                          | 1                          | I10           |               |
| 84291663        | rs1050069561      | C        | T        | 1                          | 1                          | 1                          | 1                          | 1                          | 1                          | I10           |               |

|                 |                   |          |          |          |          |          |          |          |          |           |      |
|-----------------|-------------------|----------|----------|----------|----------|----------|----------|----------|----------|-----------|------|
| 84291698        | NA                | G        | A        | 1        | 1        | 1        | 1        | 1        | 1        | I10       |      |
| 84291702        | NA                | G        | A        | 1        | 1        | 1        | 1        | 1        | 1        | I10       |      |
| <b>84294167</b> | <b>rs10868137</b> | A        | G        | 0        | 0        | 0        | 1        | 1        | 1        | I9        |      |
| <b>84294635</b> | <b>rs885004</b>   | <b>G</b> | <b>A</b> | <b>0</b> | <b>0</b> | <b>0</b> | <b>1</b> | <b>1</b> | <b>1</b> | <b>I8</b> |      |
| 84295359        | rs530032784       | C        | T        | 0        | 2        | 0        | 0        | 0        | 0        | I8        |      |
| 84296355        | NA                | C        | T        | 1        | 1        | 1        | 1        | 1        | 1        | I8        |      |
| 84297553        | NA                | C        | T        | 0        | 0        | 0        | 0        | 1        | 0        | I7        |      |
| 84298559        | NA                | G        | A        | 0        | 0        | 0        | 1        | 0        | 0        | I6        |      |
| 84299856        | rs530032784       | G        | A        | 0        | 0        | 1        | 0        | 0        | 0        | I5        |      |
| 84300626        | rs144419201       | C        | T        | 0        | 1        | 0        | 0        | 0        | 0        | I5        |      |
| 84301200        | rs12379959        | A        | T        | 1        | 0        | 1        | 0        | 0        | 0        | I5        |      |
| 84301258        | rs12377274        | G        | A        | 1        | 0        | 0        | 0        | 0        | 0        | I5        |      |
| <b>84301936</b> | <b>rs4877835</b>  | T        | G        | 0        | 0        | 0        | 1        | 1        | 1        | I5        |      |
| 84302092        | rs17087056        | C        | A        | 0        | 0        | 0        | 1        | 1        | 0        | I5        |      |
| <b>84302173</b> | <b>rs4877836</b>  | T        | C        | 0        | 0        | 0        | 1        | 1        | 1        | I5        |      |
| 84303804        | rs1021699143      | C        | T        | 1        | 1        | 1        | 1        | 1        | 1        | I4        |      |
| <b>84305321</b> | <b>rs7867504</b>  | T        | C        | 0        | 0        | 0        | 1        | 1        | 1        | E4        | T89T |
| 84305796        | rs4242626         | T        | C        | 0        | 0        | 0        | 0        | 1        | 0        | I3        |      |
| 84306347        | rs989230152       | C        | T        | 1        | 1        | 1        | 1        | 1        | 1        | I3        |      |
| <b>84307078</b> | <b>rs12237803</b> | C        | T        | 0        | 0        | 0        | 1        | 1        | 1        | I3        |      |
| 84307083        | rs1262441955      | G        | A        | 0        | 1        | 1        | 0        | 0        | 0        | I3        |      |
| 84307315        | rs142007597       | C        | T        | 1        | 0        | 0        | 0        | 0        | 0        | I3        |      |
| 84307845        | rs150776148       | T        | C        | 1        | 0        | 0        | 0        | 0        | 0        | I3        |      |
| 84308361        | rs141695271       | C        | T        | 0        | 0        | 0        | 0        | 1        | 0        | I3        |      |
| 84308737        | NA                | C        | T        | 1        | 1        | 1        | 1        | 1        | 1        | I3        |      |
| 84313793        | rs13291905        | A        | G        | 0        | 1        | 0        | 1        | 0        | 1        | I1        |      |
| 84313852        | rs7866821         | C        | G        | 2        | 1        | 1        | 0        | 2        | 0        | I1        |      |
| 84314849        | rs4877843         | T        | C        | 0        | 0        | 0        | 0        | 1        | 0        | I1        |      |
| 84319068        | rs1051842387      | T        | C        | 0        | 0        | 1        | 0        | 0        | 0        | I1        |      |
| 84319815        | rs10735568        | T        | C        | 2        | 2        | 1        | 0        | 2        | 0        | I1        |      |
| 84321516        | rs12347278        | G        | A        | 0        | 0        | 1        | 0        | 0        | 0        | I1        |      |
| 84322400        | rs11140525        | G        | A        | 1        | 0        | 0        | 0        | 1        | 0        | I1        |      |
| 84323144        | rs12004882        | C        | G        | 0        | 0        | 0        | 0        | 1        | 0        | I1        |      |
| 84324414        | rs7046305         | T        | C        | 0        | 2        | 0        | 0        | 2        | 0        | I1        |      |
| 84324908        | rs4877845         | A        | C        | 0        | 2        | 0        | 0        | 2        | 0        | I1        |      |
| 84326000        | rs1331168053      | G        | A        | 1        | 1        | 1        | 1        | 1        | 1        | I1        |      |
| 84326705        | rs4588940         | A        | G        | 0        | 0        | 0        | 0        | 2        | 0        | I1        |      |
| 84327052        | rs7019546         | A        | G        | 0        | 2        | 0        | 0        | 2        | 0        | I1        |      |

|          |              |   |   |   |   |   |   |   |   |       |  |
|----------|--------------|---|---|---|---|---|---|---|---|-------|--|
| 84327889 | rs10868148   | T | G | 0 | 2 | 0 | 0 | 2 | 0 | II    |  |
| 84328654 | rs4877846    | G | A | 0 | 0 | 0 | 0 | 2 | 0 | II    |  |
| 84328682 | rs4877273    | T | C | 0 | 2 | 0 | 0 | 2 | 0 | II    |  |
| 84328768 | rs4877274    | G | A | 0 | 2 | 0 | 0 | 2 | 0 | II    |  |
| 84328814 | rs11789143   | G | A | 1 | 1 | 1 | 1 | 1 | 1 | II    |  |
| 84329641 | NA           | C | T | 1 | 1 | 1 | 1 | 1 | 1 | II    |  |
| 84330006 | rs4242627    | C | T | 0 | 0 | 0 | 0 | 2 | 0 | II    |  |
| 84330082 | rs4242628    | G | A | 1 | 0 | 0 | 1 | 2 | 0 | II    |  |
| 84330800 | rs58075154   | C | T | 0 | 0 | 0 | 0 | 2 | 0 | II    |  |
| 84330820 | rs57409783   | A | G | 0 | 0 | 0 | 0 | 2 | 0 | II    |  |
| 84331158 | rs17343066   | G | A | 1 | 1 | 1 | 0 | 2 | 1 | II    |  |
| 84331502 | rs4877847    | A | C | 1 | 1 | 1 | 1 | 2 | 1 | II    |  |
| 84331509 | rs75663843   | T | G | 0 | 1 | 0 | 0 | 0 | 0 | II    |  |
| 84331692 | rs980292     | T | C | 1 | 2 | 1 | 1 | 2 | 1 | II    |  |
| 84332442 | rs1972245    | T | C | 1 | 1 | 1 | 1 | 2 | 1 | II    |  |
| 84332615 | NA           | G | A | 0 | 0 | 0 | 0 | 1 | 0 | II    |  |
| 84333013 | rs79257653   | C | T | 0 | 0 | 0 | 0 | 0 | 1 | II    |  |
| 84333038 | rs1248714397 | C | T | 1 | 1 | 1 | 1 | 1 | 1 | II    |  |
| 84333357 | rs118104816  | A | G | 0 | 1 | 1 | 0 | 0 | 0 | II    |  |
| 84333380 | rs4448361    | T | C | 1 | 1 | 1 | 1 | 2 | 1 | II    |  |
| 84333660 | rs76940186   | A | C | 0 | 1 | 1 | 0 | 0 | 0 | II    |  |
| 84333701 | rs4266723    | C | T | 1 | 2 | 2 | 1 | 2 | 1 | II    |  |
| 84335058 | rs10868149   | G | A | 0 | 1 | 1 | 0 | 0 | 0 | II    |  |
| 84335955 | rs4877848    | C | T | 0 | 1 | 1 | 0 | 0 | 0 | II    |  |
| 84336700 | rs4877850    | C | T | 1 | 2 | 2 | 1 | 2 | 1 | II    |  |
| 84337348 | rs6559781    | T | C | 1 | 2 | 2 | 1 | 2 | 1 | II    |  |
| 84337448 | rs149980849  | G | A | 0 | 1 | 0 | 0 | 0 | 0 | II    |  |
| 84338592 | NA           | G | A | 0 | 0 | 1 | 0 | 0 | 0 | II    |  |
| 84338706 | rs17428030   | A | G | 0 | 1 | 0 | 0 | 0 | 0 | II    |  |
| 84338759 | rs7043257    | T | C | 1 | 2 | 1 | 1 | 2 | 1 | II    |  |
| 84339395 | rs4877852    | A | G | 1 | 2 | 1 | 1 | 2 | 1 | II    |  |
| 84339551 | rs7027983    | C | T | 1 | 2 | 1 | 1 | 2 | 1 | II    |  |
| 84339776 | rs7031310    | C | G | 1 | 2 | 1 | 1 | 2 | 1 | II    |  |
| 84339802 | rs7031197    | A | G | 2 | 2 | 2 | 1 | 2 | 2 | II    |  |
| 84340111 | NA           | T | C | 0 | 0 | 0 | 1 | 0 | 0 | II    |  |
| 84340242 | rs3812509    | C | T | 1 | 2 | 1 | 1 | 2 | 1 | II    |  |
| 84340301 | rs1175981076 | C | T | 1 | 0 | 0 | 0 | 0 | 0 | II    |  |
| 84340767 | rs7035753    | C | T | 1 | 0 | 1 | 1 | 0 | 1 | 5-UTR |  |

|          |              |   |   |   |   |   |   |   |   |        |  |
|----------|--------------|---|---|---|---|---|---|---|---|--------|--|
| 84340824 | rs562029530  | C | T | 0 | 0 | 1 | 0 | 0 | 0 | 5'-UTR |  |
| 84341021 | rs4604528    | T | C | 1 | 1 | 1 | 1 | 1 | 1 | 5'-UTR |  |
| 84341181 | NA           | G | A | 0 | 0 | 0 | 0 | 1 | 0 | 5'-UTR |  |
| 84341186 | NA           | T | G | 0 | 0 | 0 | 0 | 1 | 0 | 5'-UTR |  |
| 84341202 | NA           | C | T | 0 | 0 | 0 | 0 | 1 | 0 | 5'-UTR |  |
| 84341213 | NA           | C | T | 0 | 0 | 0 | 0 | 1 | 0 | 5'-UTR |  |
| 84341214 | NA           | A | G | 0 | 0 | 0 | 0 | 1 | 0 | 5'-UTR |  |
| 84341215 | NA           | C | T | 0 | 0 | 0 | 0 | 1 | 0 | 5'-UTR |  |
| 84341217 | NA           | T | C | 0 | 0 | 0 | 0 | 1 | 0 | 5'-UTR |  |
| 84341405 | rs57404564   | C | A | 0 | 1 | 0 | 0 | 0 | 0 | 5'-UTR |  |
| 84341428 | rs28629238   | A | G | 0 | 1 | 0 | 0 | 0 | 0 | 5'-UTR |  |
| 84341697 | rs17343456   | A | G | 0 | 0 | 0 | 0 | 1 | 0 | 5'-UTR |  |
| 84342889 | NA           | C | T | 1 | 0 | 1 | 0 | 1 | 1 | 5'-UTR |  |
| 84343833 | rs12335574   | A | G | 0 | 1 | 0 | 0 | 0 | 0 | 5'-UTR |  |
| 84344334 | rs144927764  | G | A | 0 | 0 | 0 | 1 | 0 | 0 | 5'-UTR |  |
| 84345145 | rs10780664   | C | A | 0 | 1 | 0 | 0 | 0 | 0 | 5'-UTR |  |
| 84345715 | rs11140535   | A | G | 0 | 1 | 0 | 0 | 0 | 0 | 5'-UTR |  |
| 84347396 | rs77681349   | C | T | 0 | 1 | 0 | 0 | 0 | 0 | 5'-UTR |  |
| 84347715 | NA           | C | T | 0 | 0 | 0 | 0 | 1 | 1 | 5'-UTR |  |
| 84349384 | NA           | C | A | 0 | 0 | 0 | 0 | 1 | 0 | 5'-UTR |  |
| 84349394 | rs1298053988 | G | A | 0 | 0 | 0 | 0 | 1 | 0 | 5'-UTR |  |
| 84349402 | NA           | A | G | 0 | 0 | 0 | 0 | 1 | 0 | 5'-UTR |  |
| 84349404 | NA           | T | C | 0 | 0 | 0 | 0 | 1 | 0 | 5'-UTR |  |
| 84349741 | rs13298157   | G | A | 0 | 1 | 0 | 0 | 0 | 0 | 5'-UTR |  |

REF, reference allele; ALT, alternative allele; 0, homozygous reference; 1, heterozygous variant; and 2, homozygous variant; AA, amino acid. SNPs in bold are SNPs coinherited in cardio protected patients but not in cardiotoxicity patients. Variants are annotated in relevance to *SLC28A3* transcript NM\_001199633.1.

**Supplemental Table 7: Regulatory properties of *SLC28A3* SNPs coinherited only in cardioprotected patients**

| rs Id      | No. of altered chromatin feature binding sites |
|------------|------------------------------------------------|
| rs11140490 | 206                                            |
| rs4877835  | 204                                            |
| rs4877836  | 141                                            |
| rs7867504  | 134                                            |
| rs4877272  | 107                                            |
| rs885004   | 105                                            |
| rs12237803 | 52                                             |
| rs3750406  | 41                                             |
| rs12003403 | 40                                             |
| rs10868135 | 33                                             |
| rs4877831  | 32                                             |
| rs4877833  | 31                                             |
| rs10868137 | 30                                             |
| rs7853758  | 11                                             |
| rs7858075  | 6                                              |
| rs7047315  | 4                                              |
| rs7853066  | 4                                              |
| rs7030019  | 3                                              |
| rs12003423 | 2                                              |
| rs7047898  | 2                                              |
| rs11140488 | 1                                              |
| rs4877834  | 1                                              |
| rs11140489 | 0                                              |
| rs10868133 | 0                                              |

**Supplemental Table 8: *SLC28A3* SNPs coinherited only in cardio protected patient affecting chromatin feature binding sites (showing only SNPs with Log2 fold change value  $\geq 1$ )**

| SNP Id    | Cell type  chromatin  treatment       | E-value | Log2 fold change |
|-----------|---------------------------------------|---------|------------------|
| rs4877272 | ECC-1 ERalpha BPA_100nM               | 0.01    | -1.01            |
|           | H1-hESC TEAD4 None                    | 0.01    | -1.60            |
|           | NT2-D1 DNase None                     | 0.03    | -1.22            |
|           | NHEK DNase None                       | 0.03    | -1.01            |
|           | H7-hESC DNase None                    | 0.03    | -1.22            |
|           | H1-hESC DNase None                    | 0.04    | -1.22            |
|           | RWPE1 DNase None                      | 0.05    | -1.09            |
| rs7867504 | GM12878 JunD None                     | 0.00    | -1.11            |
|           | PrEC DNase None                       | 0.01    | -1.55            |
|           | GM12878 BATF None                     | 0.01    | -1.34            |
|           | GM12865 DNase None                    | 0.01    | -1.04            |
|           | GM12864 DNase None                    | 0.01    | -1.00            |
|           | SAEC DNase None                       | 0.01    | -1.62            |
|           | HMEC DNase None                       | 0.01    | -1.12            |
|           | HEEpiC DNase None                     | 0.01    | -1.52            |
|           | pHTE DNase None                       | 0.01    | -1.06            |
|           | NHEK DNase None                       | 0.01    | -1.17            |
|           | HRCEpiC DNase None                    | 0.02    | -1.18            |
|           | HRE DNase None                        | 0.02    | -1.21            |
|           | HPDE6-E6E7 DNase None                 | 0.02    | -1.22            |
|           | MCF10A-Er-Src STAT3 4OHTAM_1uM_12hr   | 0.02    | -1.30            |
|           | MCF10A-Er-Src STAT3 EtOH_0.01pct_12hr | 0.02    | -1.25            |
|           | MCF10A-Er-Src c-Fos 4OHTAM_1uM_12hr   | 0.02    | -1.81            |
|           | MCF10A-Er-Src c-Myc 4OHTAM_1uM_4hr    | 0.02    | -1.06            |
|           | MCF10A-Er-Src STAT3 EtOH_0.01pct_4hr  | 0.02    | -1.18            |
|           | MCF10A-Er-Src STAT3 4OHTAM_1uM_36hr   | 0.02    | -1.21            |
|           | MCF10A-Er-Src STAT3 EtOH_0.01pct      | 0.02    | -1.00            |
|           | MCF10A-Er-Src c-Fos 4OHTAM_1uM_4hr    | 0.02    | -1.67            |
|           | RWPE1 DNase None                      | 0.02    | -1.17            |
|           | HUVEC c-Fos None                      | 0.03    | -1.09            |
|           | MCF10A-Er-Src c-Fos EtOH_0.01pct      | 0.03    | -1.66            |
|           | MCF10A-Er-Src c-Fos 4OHTAM_1uM_36hr   | 0.03    | -1.82            |
|           | HMVEC-dBl-Ad DNase None               | 0.03    | -1.13            |

|            |                              |      |       |
|------------|------------------------------|------|-------|
|            | RPTEC DNase None             | 0.03 | -1.01 |
|            | HMVEC-dLy-Neo DNase None     | 0.03 | -1.02 |
|            | WI-38 DNase 4OHTAM_20nM_72hr | 0.04 | -1.28 |
|            | HMVEC-LBI DNase None         | 0.04 | -1.18 |
|            | HUVEC c-Jun None             | 0.04 | -1.01 |
|            | HFF-Myc DNase None           | 0.05 | -1.03 |
|            | NHLF DNase None              | 0.05 | -1.16 |
| rs11140490 | Melano DNase None            | 0.00 | 1.05  |
|            | HSMM_emb DNase None          | 0.00 | 1.22  |
|            | HSMMtube DNase None          | 0.00 | 1.42  |
|            | NHDF-neo DNase None          | 0.00 | 1.76  |
|            | NHDF-Ad DNase None           | 0.00 | 1.73  |
|            | AG10803 DNase None           | 0.00 | 1.56  |
|            | ProgFib DNase None           | 0.00 | 1.34  |
|            | FibroP DNase None            | 0.00 | 1.25  |
|            | HGF DNase None               | 0.00 | 1.56  |
|            | HPdLF DNase None             | 0.00 | 1.58  |
|            | Stellate DNase None          | 0.00 | 1.36  |
|            | HCF DNase None               | 0.00 | 1.42  |
|            | AG09319 DNase None           | 0.00 | 1.46  |
|            | HSMM DNase None              | 0.00 | 1.36  |
|            | SK-N-SH TAF1 None            | 0.00 | 1.07  |
|            | HFF DNase None               | 0.00 | 1.35  |
|            | BJ DNase None                | 0.00 | 1.42  |
|            | HCM DNase None               | 0.00 | 1.42  |
|            | AG09309 DNase None           | 0.00 | 1.45  |
|            | Myometr DNase None           | 0.00 | 1.16  |
|            | AG04449 DNase None           | 0.00 | 1.37  |
|            | HPF DNase None               | 0.00 | 1.51  |
|            | AoAF DNase None              | 0.00 | 1.36  |
|            | AoSMC DNase None             | 0.00 | 1.40  |
|            | SKMC DNase None              | 0.00 | 1.29  |
|            | PanIsletD DNase None         | 0.00 | 1.18  |
|            | HMF DNase None               | 0.00 | 1.42  |
|            | HPAF DNase None              | 0.00 | 1.31  |
|            | HConF DNase None             | 0.00 | 1.37  |
|            | HAc DNase None               | 0.00 | 1.07  |
|            | HFF-Myc DNase None           | 0.00 | 1.08  |

|            |                              |      |      |
|------------|------------------------------|------|------|
|            | HBMEC DNase None             | 0.00 | 1.29 |
|            | WI-38 DNase 4OHTAM_20nM_72hr | 0.00 | 1.17 |
|            | NH-A DNase None              | 0.01 | 1.16 |
|            | WI-38 DNase None             | 0.01 | 1.25 |
|            | NHLF DNase None              | 0.01 | 1.15 |
|            | AG04450 DNase None           | 0.01 | 1.21 |
|            | HCFAa DNase None             | 0.01 | 1.13 |
|            | HNPCEpiC DNase None          | 0.01 | 1.16 |
|            | HVMF DNase None              | 0.01 | 1.26 |
|            | HCPEpiC DNase None           | 0.01 | 1.05 |
|            | HIPEpiC DNase None           | 0.01 | 1.06 |
|            | HAPEpiC DNase None           | 0.01 | 1.10 |
| rs4877835  | NHDF-Ad DNase None           | 0.01 | 1.07 |
|            | NHDF-neo DNase None          | 0.01 | 1.06 |
|            | BE2_C DNase None             | 0.01 | 1.08 |
|            | SK-N-SH_RA DNase None        | 0.01 | 1.08 |
| rs10868137 | H1-hESC TCF12 None           | 0.00 | 1.07 |
|            | GM12878 ZEB1 None            | 0.00 | 1.06 |

E-value, expect value stands for the significance of each individual chromatin feature predicted score; Log2 fold change, measure the fold change in the probability of observing a binding site for relevant chromatin feature between reference and alternative allele for a particular SNP<sup>21</sup>.

**Supplemental Table 9: *SLC28A3* SNPs coinherited only in cardioprotected patients located at regulatory regions and histone marks in cardiac tissues, and at transcription factor binding sites using ensemble regulatory build**

| SNP Id     | Position | Histone marks in cardiac tissue | Regulatory region in cardiac tissue | Motifs present at SNP locus                                                                                                                                                                                                                                                                                                                                                                |
|------------|----------|---------------------------------|-------------------------------------|--------------------------------------------------------------------------------------------------------------------------------------------------------------------------------------------------------------------------------------------------------------------------------------------------------------------------------------------------------------------------------------------|
| rs3750406  | 84277979 | NA                              | Open chromatin                      | TEAD4::RFX5, FOXJ3::TBX21, SOX6::TBX21, ELK1::FOXI1, ETV2::FOXI1, MGA, TBX2, TBX4, TBX5, ONECUT1, ONECUT2, ONECUT3, HOXB2::EOMES,HOXB2::TBX21, HOXB2::TBX3, MGA::DLX2, MGA::DLX3, MGA::EVX1, PITX1::HES7, E2F3::ONECUT2,TFAP2C::ONECUT2, ETV2::SREBF2, CUX1::SOX15, HOXB13::EOMES, HOXB13::TBX21,HOXD12::TBX21, TBX20, KLF13, KLF14,SREBF2, GLIS1, EOMES, SNAI2, TCF3, TCF4, THRB (n = 36) |
| rs7858075  | 84278156 | NA                              | Open chromatin                      | TEAD4::FOXI1, IRF3, ETV2::SOX15, POU2F1::FOXO6, POU2F1::DLX2, TEAD4::FOXI1 (n = 6)                                                                                                                                                                                                                                                                                                         |
| rs11140490 | 84278398 | NA                              | Open chromatin                      | CLOCK::FIGLA, TEAD4::EOMES, TEAD4::TBX21, ETV2::DRGX, ZIC1, ZIC3, ZIC4, HOXB2::NHLH1,TEAD4::TCF3, GCM2::SOX15, and TEAD4::FIGLA (n = 11)                                                                                                                                                                                                                                                   |
| rs4877831  | 84284969 | H3K4me1                         | NA                                  | NA                                                                                                                                                                                                                                                                                                                                                                                         |
| rs7047898  | 84291502 | H3K36me3                        | NA                                  | NA                                                                                                                                                                                                                                                                                                                                                                                         |
| rs10868137 | 84294167 | NA                              |                                     | TFAP2C::DLX3, FOXO1::HOXB13, MGA::DLX3, HOXB2::TCF3 (n = 4)                                                                                                                                                                                                                                                                                                                                |
| rs885004   | 84294635 | NA                              | CTCF binding site                   | THRB, TEAD4::CEBPD, ERF::PITX1, ETV2::GSC2, ERF::ONECUT2, ETV2::ONECUT2, FLI1::ONECUT2, POU2F1::DLX2, R, X3::SRF, TEAD4::PAX5, PITX1::HES7, HESX1, LHX9, HOXD12::HOXA3, ZBED1, BARHL2, E2F1, E2F2, E2F3, BARX1, MSX1, MSX2, TBX1, TBX20, HOXB13::EOMES, HOXB13::TBX21, TEAD4::HOXB13, PBX4::HOXA1, PBX4::HOXA10, ONECUT1, ONECUT2, HMX1, HMX2, HMX3, CUX1::SOX15, TFAP2C::ONECUT2 (n = 36) |
| rs4877835  | 84301936 | NA                              | NA                                  | POU2F1::FOXO6, POU2F1::EOMES, CLOCK::BHLHA15, MAX, TFAP4::MAX, HOXD12::EOMES, FOXO1, FOXO3, FOXO4, FOXO6, CTCF, ZNF238, ASCL2, BHLHA15, BHLHE22, BHLHE23,MESP2, MSC, MYF6, NEUROD2, NEUROG2, NHLH1, OLIG1, OLIG2, OLIG3, TCF15, TFAP4, ESRR, ESRRG, FOXJ2::HOXB13 (n = 30)                                                                                                                 |
| rs4877836  | 84302173 | NA                              | NA                                  | MYBL1, MYBL2, IRF4, IRF5, IRF8, IRF9, ELK1::FOXI1, ERF::FOXI1, ETV2::FOXI1, ETV5::FOXI1, FLI1::FOXI1, FOXO1::ELF1, FOXO1::ELK1, ELK1::HOXA3 (n=14)                                                                                                                                                                                                                                         |

**Supplemental Table 10: eQTL functional annotation of *SLC28A3* SNPs coinherited only in cardioprotected patients**

| SNP Id     | P-value   | NES   | Tissue                       |
|------------|-----------|-------|------------------------------|
| rs10868133 | 2.10E-07  | -0.22 | Cells - Cultured fibroblasts |
|            | 4.50E-07  | 0.21  | Thyroid                      |
| rs10868135 | 4.10E-07  | -0.22 | Cells - Cultured fibroblasts |
|            | 0.0000034 | 0.2   | Thyroid                      |
| rs10868137 | 3.80E-07  | 0.23  | Thyroid                      |
|            | 6.70E-07  | -0.22 | Cells - Cultured fibroblasts |
| rs11140488 | 1.60E-07  | -0.22 | Cells - Cultured fibroblasts |
|            | 2.60E-07  | 0.22  | Thyroid                      |
| rs11140489 | 1.50E-07  | -0.22 | Cells - Cultured fibroblasts |
|            | 4.20E-07  | 0.21  | Thyroid                      |
| rs11140490 | 1.40E-07  | -0.22 | Cells - Cultured fibroblasts |
|            | 6.30E-07  | 0.21  | Thyroid                      |
| rs12003403 | 1.60E-07  | -0.22 | Cells - Cultured fibroblasts |
|            | 2.60E-07  | 0.22  | Thyroid                      |
| rs12003423 | 1.60E-07  | -0.22 | Cells - Cultured fibroblasts |
|            | 7.20E-07  | 0.21  | Thyroid                      |
| rs12237803 | 4.70E-08  | -0.24 | Cells - Cultured fibroblasts |
|            | 7.50E-08  | 0.24  | Thyroid                      |
| rs3750406  | 1.40E-07  | -0.22 | Cells - Cultured fibroblasts |
|            | 6.30E-07  | 0.21  | Thyroid                      |
| rs4877272  | 6.40E-08  | -0.23 | Cells - Cultured fibroblasts |
|            | 5.60E-07  | 0.21  | Thyroid                      |
| rs4877831  | 6.00E-09  | -0.21 | Cells - Cultured fibroblasts |
|            | 0.000021  | 0.16  | Thyroid                      |
| rs4877833  | 5.30E-07  | -0.21 | Cells - Cultured fibroblasts |
|            | 8.90E-07  | 0.21  | Thyroid                      |
| rs4877834  | 4.70E-08  | 0.24  | Thyroid                      |
|            | 7.40E-07  | -0.21 | Cells - Cultured fibroblasts |
| rs4877835  | 4.20E-07  | 0.23  | Thyroid                      |
|            | 5.20E-07  | -0.22 | Cells - Cultured fibroblasts |
| rs4877836  | 3.10E-07  | -0.23 | Cells - Cultured fibroblasts |
|            | 3.30E-07  | 0.23  | Thyroid                      |
| rs7030019  | 1.70E-08  | 0.25  | Thyroid                      |
|            | 8.70E-08  | -0.23 | Cells - Cultured fibroblasts |

|           |           |       |                              |
|-----------|-----------|-------|------------------------------|
|           | 0.000014  | 0.64  | Brain - Amygdala             |
| rs7047315 | 3.80E-07  | 0.23  | Thyroid                      |
|           | 6.70E-07  | -0.22 | Cells - Cultured fibroblasts |
| rs7047898 | 3.80E-07  | 0.23  | Thyroid                      |
|           | 6.70E-07  | -0.22 | Cells - Cultured fibroblasts |
| rs7853066 | 1.50E-07  | 0.23  | Thyroid                      |
|           | 7.00E-07  | -0.21 | Cells - Cultured fibroblasts |
| rs7853758 | 3.10E-08  | 0.23  | Thyroid                      |
|           | 0.0000019 | -0.2  | Cells - Cultured fibroblasts |
|           | 0.000014  | 0.61  | Brain - Amygdala             |
| rs7867504 | 0.000003  | -0.16 | Cells - Cultured fibroblasts |
| rs885004  | 1.30E-07  | -0.23 | Cells - Cultured fibroblasts |
|           | 1.90E-07  | 0.23  | Thyroid                      |

NES, normalized effect size; This analysis was done using GTEX eQTL database

**Supplemental Table 11: Linkage disequilibrium pattern of Nanopore-identified cardioprotective haplotype SNPs ( $n = 24$ ) in 99 control individuals**

| SNP 1      | SNP 2      | D'   | R <sup>2</sup> | SNP 1      | SNP 2      | D'   | R <sup>2</sup> |
|------------|------------|------|----------------|------------|------------|------|----------------|
| rs12003403 | rs12003423 | 1.00 | 1.00           | rs11140488 | rs11140489 | 1.00 | 1.00           |
| rs12003403 | rs11140488 | 1.00 | 1.00           | rs11140488 | rs10868133 | 1.00 | 1.00           |
| rs12003403 | rs11140489 | 1.00 | 1.00           | rs11140488 | rs4877272  | 1.00 | 1.00           |
| rs12003403 | rs10868133 | 1.00 | 1.00           | rs11140488 | rs3750406  | 1.00 | 1.00           |
| rs12003403 | rs4877272  | 1.00 | 1.00           | rs11140488 | rs7858075  | 1.00 | 1.00           |
| rs12003403 | rs3750406  | 1.00 | 1.00           | rs11140488 | rs11140490 | 1.00 | 1.00           |
| rs12003403 | rs7858075  | 1.00 | 1.00           | rs11140488 | rs10868135 | 1.00 | 1.00           |
| rs12003403 | rs11140490 | 1.00 | 1.00           | rs11140488 | rs4877831  | 0.96 | 0.65           |
| rs12003403 | rs10868135 | 1.00 | 1.00           | rs11140488 | rs4877833  | 1.00 | 0.97           |
| rs12003403 | rs4877831  | 0.96 | 0.65           | rs11140488 | rs7853066  | 1.00 | 0.85           |
| rs12003403 | rs4877833  | 1.00 | 0.97           | rs11140488 | rs7853758  | 0.97 | 0.82           |
| rs12003403 | rs7853066  | 1.00 | 0.85           | rs11140488 | rs7030019  | 1.00 | 0.85           |
| rs12003403 | rs7853758  | 0.97 | 0.82           | rs11140488 | rs4877834  | 1.00 | 0.88           |
| rs12003403 | rs7030019  | 1.00 | 0.85           | rs11140488 | rs7047315  | 1.00 | 0.88           |
| rs12003403 | rs4877834  | 1.00 | 0.88           | rs11140488 | rs7047898  | 1.00 | 0.88           |
| rs12003403 | rs7047315  | 1.00 | 0.88           | rs11140488 | rs10868137 | 1.00 | 0.88           |
| rs12003403 | rs7047898  | 1.00 | 0.88           | rs11140488 | rs885004   | 1.00 | 0.85           |
| rs12003403 | rs10868137 | 1.00 | 0.88           | rs11140488 | rs4877835  | 1.00 | 0.88           |
| rs12003403 | rs885004   | 1.00 | 0.85           | rs11140488 | rs4877836  | 1.00 | 0.88           |
| rs12003403 | rs4877835  | 1.00 | 0.88           | rs11140488 | rs7867504  | 0.95 | 0.37           |
| rs12003403 | rs4877836  | 1.00 | 0.88           | rs11140488 | rs12237803 | 1.00 | 0.82           |
| rs12003403 | rs7867504  | 0.95 | 0.37           | rs11140489 | rs10868133 | 1.00 | 1.00           |
| rs12003403 | rs12237803 | 1.00 | 0.82           | rs11140489 | rs4877272  | 1.00 | 1.00           |
| rs12003423 | rs11140488 | 1.00 | 1.00           | rs11140489 | rs3750406  | 1.00 | 1.00           |
| rs12003423 | rs11140489 | 1.00 | 1.00           | rs11140489 | rs7858075  | 1.00 | 1.00           |
| rs12003423 | rs10868133 | 1.00 | 1.00           | rs11140489 | rs11140490 | 1.00 | 1.00           |
| rs12003423 | rs4877272  | 1.00 | 1.00           | rs11140489 | rs10868135 | 1.00 | 1.00           |
| rs12003423 | rs3750406  | 1.00 | 1.00           | rs11140489 | rs4877831  | 0.96 | 0.65           |
| rs12003423 | rs7858075  | 1.00 | 1.00           | rs11140489 | rs4877833  | 1.00 | 0.97           |
| rs12003423 | rs11140490 | 1.00 | 1.00           | rs11140489 | rs7853066  | 1.00 | 0.85           |
| rs12003423 | rs10868135 | 1.00 | 1.00           | rs11140489 | rs7853758  | 0.97 | 0.82           |
| rs12003423 | rs4877831  | 0.96 | 0.65           | rs11140489 | rs7030019  | 1.00 | 0.85           |
| rs12003423 | rs4877833  | 1.00 | 0.97           | rs11140489 | rs4877834  | 1.00 | 0.88           |
| rs12003423 | rs7853066  | 1.00 | 0.85           | rs11140489 | rs7047315  | 1.00 | 0.88           |

|            |            |      |      |            |            |      |      |
|------------|------------|------|------|------------|------------|------|------|
| rs12003423 | rs7853758  | 0.97 | 0.82 | rs11140489 | rs7047898  | 1.00 | 0.88 |
| rs12003423 | rs7030019  | 1.00 | 0.85 | rs11140489 | rs10868137 | 1.00 | 0.88 |
| rs12003423 | rs4877834  | 1.00 | 0.88 | rs11140489 | rs885004   | 1.00 | 0.85 |
| rs12003423 | rs7047315  | 1.00 | 0.88 | rs11140489 | rs4877835  | 1.00 | 0.88 |
| rs12003423 | rs7047898  | 1.00 | 0.88 | rs11140489 | rs4877836  | 1.00 | 0.88 |
| rs12003423 | rs10868137 | 1.00 | 0.88 | rs11140489 | rs7867504  | 0.95 | 0.37 |
| rs12003423 | rs885004   | 1.00 | 0.85 | rs11140489 | rs12237803 | 1.00 | 0.82 |
| rs12003423 | rs4877835  | 1.00 | 0.88 | rs10868133 | rs4877272  | 1.00 | 1.00 |
| rs12003423 | rs4877836  | 1.00 | 0.88 | rs10868133 | rs3750406  | 1.00 | 1.00 |
| rs12003423 | rs7867504  | 0.95 | 0.37 | rs10868133 | rs7858075  | 1.00 | 1.00 |
| rs12003423 | rs12237803 | 1.00 | 0.82 | rs10868133 | rs11140490 | 1.00 | 1.00 |
| rs4877272  | rs3750406  | 1.00 | 1.00 | rs10868133 | rs10868135 | 1.00 | 1.00 |
| rs4877272  | rs7858075  | 1.00 | 1.00 | rs10868133 | rs4877831  | 0.96 | 0.65 |
| rs4877272  | rs11140490 | 1.00 | 1.00 | rs10868133 | rs4877833  | 1.00 | 0.97 |
| rs4877272  | rs10868135 | 1.00 | 1.00 | rs10868133 | rs7853066  | 1.00 | 0.85 |
| rs4877272  | rs4877831  | 0.96 | 0.65 | rs10868133 | rs7853758  | 0.97 | 0.82 |
| rs4877272  | rs4877833  | 1.00 | 0.97 | rs10868133 | rs7030019  | 1.00 | 0.85 |
| rs4877272  | rs7853066  | 1.00 | 0.85 | rs10868133 | rs4877834  | 1.00 | 0.88 |
| rs4877272  | rs7853758  | 0.97 | 0.82 | rs10868133 | rs7047315  | 1.00 | 0.88 |
| rs4877272  | rs7030019  | 1.00 | 0.85 | rs10868133 | rs7047898  | 1.00 | 0.88 |
| rs4877272  | rs4877834  | 1.00 | 0.88 | rs10868133 | rs10868137 | 1.00 | 0.88 |
| rs4877272  | rs7047315  | 1.00 | 0.88 | rs10868133 | rs885004   | 1.00 | 0.85 |
| rs4877272  | rs7047898  | 1.00 | 0.88 | rs10868133 | rs4877835  | 1.00 | 0.88 |
| rs4877272  | rs10868137 | 1.00 | 0.88 | rs10868133 | rs4877836  | 1.00 | 0.88 |
| rs4877272  | rs885004   | 1.00 | 0.85 | rs10868133 | rs7867504  | 0.95 | 0.37 |
| rs4877272  | rs4877835  | 1.00 | 0.88 | rs10868133 | rs12237803 | 1.00 | 0.82 |
| rs4877272  | rs4877836  | 1.00 | 0.88 | rs3750406  | rs7858075  | 1.00 | 1.00 |
| rs4877272  | rs7867504  | 0.95 | 0.37 | rs3750406  | rs11140490 | 1.00 | 1.00 |
| rs4877272  | rs12237803 | 1.00 | 0.82 | rs3750406  | rs10868135 | 1.00 | 1.00 |
| rs7858075  | rs11140490 | 1.00 | 1.00 | rs3750406  | rs4877831  | 0.96 | 0.65 |
| rs7858075  | rs10868135 | 1.00 | 1.00 | rs3750406  | rs4877833  | 1.00 | 0.97 |
| rs7858075  | rs4877831  | 0.96 | 0.65 | rs3750406  | rs7853066  | 1.00 | 0.85 |
| rs7858075  | rs4877833  | 1.00 | 0.97 | rs3750406  | rs7853758  | 0.97 | 0.82 |
| rs7858075  | rs7853066  | 1.00 | 0.85 | rs3750406  | rs7030019  | 1.00 | 0.85 |
| rs7858075  | rs7853758  | 0.97 | 0.82 | rs3750406  | rs4877834  | 1.00 | 0.88 |
| rs7858075  | rs7030019  | 1.00 | 0.85 | rs3750406  | rs7047315  | 1.00 | 0.88 |
| rs7858075  | rs4877834  | 1.00 | 0.88 | rs3750406  | rs7047898  | 1.00 | 0.88 |

|            |            |      |      |            |            |      |      |
|------------|------------|------|------|------------|------------|------|------|
| rs7858075  | rs7047315  | 1.00 | 0.88 | rs3750406  | rs10868137 | 1.00 | 0.88 |
| rs7858075  | rs7047898  | 1.00 | 0.88 | rs3750406  | rs885004   | 1.00 | 0.85 |
| rs7858075  | rs10868137 | 1.00 | 0.88 | rs3750406  | rs4877835  | 1.00 | 0.88 |
| rs7858075  | rs885004   | 1.00 | 0.85 | rs3750406  | rs4877836  | 1.00 | 0.88 |
| rs7858075  | rs4877835  | 1.00 | 0.88 | rs3750406  | rs7867504  | 0.95 | 0.37 |
| rs7858075  | rs4877836  | 1.00 | 0.88 | rs3750406  | rs12237803 | 1.00 | 0.82 |
| rs7858075  | rs7867504  | 0.95 | 0.37 | rs11140490 | rs10868135 | 1.00 | 1.00 |
| rs7858075  | rs12237803 | 1.00 | 0.82 | rs11140490 | rs4877831  | 0.96 | 0.65 |
| rs10868135 | rs4877831  | 0.96 | 0.65 | rs11140490 | rs4877833  | 1.00 | 0.97 |
| rs10868135 | rs4877833  | 1.00 | 0.97 | rs11140490 | rs7853066  | 1.00 | 0.85 |
| rs10868135 | rs7853066  | 1.00 | 0.85 | rs11140490 | rs7853758  | 0.97 | 0.82 |
| rs10868135 | rs7853758  | 0.97 | 0.82 | rs11140490 | rs7030019  | 1.00 | 0.85 |
| rs10868135 | rs7030019  | 1.00 | 0.85 | rs11140490 | rs4877834  | 1.00 | 0.88 |
| rs10868135 | rs4877834  | 1.00 | 0.88 | rs11140490 | rs7047315  | 1.00 | 0.88 |
| rs10868135 | rs7047315  | 1.00 | 0.88 | rs11140490 | rs7047898  | 1.00 | 0.88 |
| rs10868135 | rs7047898  | 1.00 | 0.88 | rs11140490 | rs10868137 | 1.00 | 0.88 |
| rs10868135 | rs10868137 | 1.00 | 0.88 | rs11140490 | rs885004   | 1.00 | 0.85 |
| rs10868135 | rs885004   | 1.00 | 0.85 | rs11140490 | rs4877835  | 1.00 | 0.88 |
| rs10868135 | rs4877835  | 1.00 | 0.88 | rs11140490 | rs4877836  | 1.00 | 0.88 |
| rs10868135 | rs4877836  | 1.00 | 0.88 | rs11140490 | rs7867504  | 0.95 | 0.37 |
| rs10868135 | rs7867504  | 0.95 | 0.37 | rs11140490 | rs12237803 | 1.00 | 0.82 |
| rs10868135 | rs12237803 | 1.00 | 0.82 | rs7853066  | rs7853758  | 0.97 | 0.90 |
| rs4877831  | rs4877833  | 1.00 | 0.68 | rs7853066  | rs7030019  | 0.97 | 0.93 |
| rs4877831  | rs7853066  | 1.00 | 0.59 | rs7853066  | rs4877834  | 0.97 | 0.90 |
| rs4877831  | rs7853758  | 0.92 | 0.52 | rs7853066  | rs7047315  | 0.97 | 0.90 |
| rs4877831  | rs7030019  | 0.96 | 0.54 | rs7853066  | rs7047898  | 0.97 | 0.90 |
| rs4877831  | rs4877834  | 0.96 | 0.56 | rs7853066  | rs10868137 | 0.97 | 0.90 |
| rs4877831  | rs7047315  | 0.96 | 0.56 | rs7853066  | rs885004   | 0.97 | 0.93 |
| rs4877831  | rs7047898  | 0.96 | 0.56 | rs7853066  | rs4877835  | 0.97 | 0.90 |
| rs4877831  | rs10868137 | 0.96 | 0.56 | rs7853066  | rs4877836  | 0.97 | 0.90 |
| rs4877831  | rs885004   | 0.96 | 0.54 | rs7853066  | rs7867504  | 0.94 | 0.31 |
| rs4877831  | rs4877835  | 0.96 | 0.56 | rs7853066  | rs12237803 | 0.97 | 0.90 |
| rs4877831  | rs4877836  | 0.96 | 0.56 | rs7853758  | rs7030019  | 1.00 | 0.97 |
| rs4877831  | rs7867504  | 0.97 | 0.55 | rs7853758  | rs4877834  | 0.97 | 0.93 |
| rs4877831  | rs12237803 | 0.96 | 0.52 | rs7853758  | rs7047315  | 0.97 | 0.93 |
| rs4877833  | rs7853066  | 1.00 | 0.88 | rs7853758  | rs7047898  | 0.97 | 0.93 |
| rs4877833  | rs7853758  | 0.93 | 0.79 | rs7853758  | rs10868137 | 0.97 | 0.93 |

|           |            |      |      |            |            |      |      |
|-----------|------------|------|------|------------|------------|------|------|
| rs4877833 | rs7030019  | 0.96 | 0.82 | rs7853758  | rs885004   | 1.00 | 0.97 |
| rs4877833 | rs4877834  | 0.97 | 0.85 | rs7853758  | rs4877835  | 0.97 | 0.93 |
| rs4877833 | rs7047315  | 0.97 | 0.85 | rs7853758  | rs4877836  | 0.97 | 0.93 |
| rs4877833 | rs7047898  | 0.97 | 0.85 | rs7853758  | rs7867504  | 0.95 | 0.32 |
| rs4877833 | rs10868137 | 0.97 | 0.85 | rs7853758  | rs12237803 | 1.00 | 0.93 |
| rs4877833 | rs885004   | 0.96 | 0.82 | rs7030019  | rs4877834  | 1.00 | 0.97 |
| rs4877833 | rs4877835  | 0.97 | 0.85 | rs7030019  | rs7047315  | 1.00 | 0.97 |
| rs4877833 | rs4877836  | 0.97 | 0.85 | rs7030019  | rs7047898  | 1.00 | 0.97 |
| rs4877833 | rs7867504  | 0.95 | 0.36 | rs7030019  | rs10868137 | 1.00 | 0.97 |
| rs4877833 | rs12237803 | 0.96 | 0.79 | rs7030019  | rs885004   | 1.00 | 1.00 |
| rs4877834 | rs7047315  | 1.00 | 1.00 | rs7030019  | rs4877835  | 1.00 | 0.97 |
| rs4877834 | rs7047898  | 1.00 | 1.00 | rs7030019  | rs4877836  | 1.00 | 0.97 |
| rs4877834 | rs10868137 | 1.00 | 1.00 | rs7030019  | rs7867504  | 1.00 | 0.35 |
| rs4877834 | rs885004   | 1.00 | 0.97 | rs7030019  | rs12237803 | 1.00 | 0.97 |
| rs4877834 | rs4877835  | 1.00 | 1.00 | rs7047898  | rs10868137 | 1.00 | 1.00 |
| rs4877834 | rs4877836  | 1.00 | 1.00 | rs7047898  | rs885004   | 1.00 | 0.97 |
| rs4877834 | rs7867504  | 1.00 | 0.36 | rs7047898  | rs4877835  | 1.00 | 1.00 |
| rs4877834 | rs12237803 | 1.00 | 0.93 | rs7047898  | rs4877836  | 1.00 | 1.00 |
| rs7047315 | rs7047898  | 1.00 | 1.00 | rs7047898  | rs7867504  | 1.00 | 0.36 |
| rs7047315 | rs10868137 | 1.00 | 1.00 | rs7047898  | rs12237803 | 1.00 | 0.93 |
| rs7047315 | rs885004   | 1.00 | 0.97 | rs10868137 | rs885004   | 1.00 | 0.97 |
| rs7047315 | rs4877835  | 1.00 | 1.00 | rs10868137 | rs4877835  | 1.00 | 1.00 |
| rs7047315 | rs4877836  | 1.00 | 1.00 | rs10868137 | rs4877836  | 1.00 | 1.00 |
| rs7047315 | rs7867504  | 1.00 | 0.36 | rs10868137 | rs7867504  | 1.00 | 0.36 |
| rs7047315 | rs12237803 | 1.00 | 0.93 | rs10868137 | rs12237803 | 1.00 | 0.93 |
| rs885004  | rs4877835  | 1.00 | 0.97 | rs4877835  | rs4877836  | 1.00 | 1.00 |
| rs885004  | rs4877836  | 1.00 | 0.97 | rs4877835  | rs7867504  | 1.00 | 0.36 |
| rs885004  | rs7867504  | 1.00 | 0.35 | rs4877835  | rs12237803 | 1.00 | 0.93 |
| rs885004  | rs12237803 | 1.00 | 0.97 | rs4877836  | rs7867504  | 1.00 | 0.36 |
| rs7867504 | rs12237803 | 1.00 | 0.34 | rs4877836  | rs12237803 | 1.00 | 0.93 |

D', d prime; R<sup>2</sup>, r-squared, linkage disequilibrium coefficients.

**Supplemental Table 12: List of drugs previously associated with attenuating uptake via SLC transporters.**

| <b>Drug</b>                | <b>Transporter</b>                                                                           | <b>References</b> |
|----------------------------|----------------------------------------------------------------------------------------------|-------------------|
| Bosutinib                  | SLC16A2 and SLC29A1                                                                          | 25-27             |
| Cimetidine                 | SLC22A2 and SLC47A2                                                                          | 28,29             |
| Cyclosporin A              | SLCO1B1, SLCO1B3, SLC10A2, SLC10A1, and SLC22A6,                                             | 30-34             |
| Dasatinib                  | SLCO1B1, SLCO1B3, SLC29A1, and SLC16A2                                                       | 25,26,35          |
| Entecavir                  | SLC22A6 and SLC22A8                                                                          | 36                |
| Indomethacin               | SLC22A6, SLCO1A2, SLC10A1, and SLC22A6                                                       | 37,38             |
| Nilotinib                  | SLCO1B1 and SLC29A1                                                                          | 26,39             |
| Pazopanib hydrochloride    | SLCO1B1                                                                                      | 39,40             |
| Phlorizin dihydrate        | SLC5A2 and SLC5A2                                                                            | 41,42             |
| Quinidine                  | SLC22A1, SLC22A2, SLC2A4, SL C22A5, SLCO1A2, and SLC22A8                                     | 43-49             |
| Rifampicin                 | SLC21A6, SLC21A8, SLC21A9, SLC21A3, SLCO1B3, SLC22A7, SLCO1B1, SLCO2B1, SLCO1A2, and SLCO1B3 | 50-53             |
| Rifamycin SV sodium salt   | SLC21A6, SLC21A8, SLC21A9, SLC21A3, SLCO1A2, SLCO1B1, SLCO1B3, SLCO2A1, SLCO2B1, and SLC47A1 | 50,51,54          |
| Sulfobromophthalein sodium | SLC1A1 and SLCO1B2                                                                           | 50,51             |
| Sunitinib                  | SLC22A1, SLC22A2 and SLC22A3                                                                 | 55                |
| Vadentanib                 | SLC22A2                                                                                      | 56                |
| verapamil                  | SLC22A1, SLC22A4, SLC22A5, SLCO1B1, SLCO1A2, SLC47A1 and SLC47A2                             | 48,57-60          |
| Desipramine                | SLC22A1, SLC22A2, SLC22A3, SLC22A4 and SLC22A5                                               | 61-65             |

**Supplemental Table 13: Major echocardiography parameters for mice treated with DOX and DOX+DESP at base line and three weeks post treatment.**

| Base line  | DESP+DOX |       |       |       |       |       |       |       | Mean     | SD   | DOX   |       |       |       |       |       |       |       |       |       | Mean  | SD   |
|------------|----------|-------|-------|-------|-------|-------|-------|-------|----------|------|-------|-------|-------|-------|-------|-------|-------|-------|-------|-------|-------|------|
| Mouse ID   | 3453     | 3455  | 3456  | 3457  | 3458  | 3459  | 3460  | 3461  |          |      | 1     | 2     | 3     | 4     | 5     | 6     | 7     | 8     | 9     | 10    |       |      |
| IVSd (mm)  | 0.99     | 0.92  | 0.92  | 0.98  | 0.87  | 0.82  | 0.89  | 0.89  | 0.91     | 0.06 | 0.89  | 0.89  | 0.78  | 0.74  | 0.85  | 0.71  | 0.74  | 0.71  | 0.74  | 0.78  | 0.78  | 0.07 |
| IVSs (mm)  | 1.38     | 1.27  | 1.30  | 1.33  | 1.31  | 1.06  | 1.36  | 1.21  | 1.28     | 0.10 | 1.17  | 1.24  | 1.10  | 1.03  | 1.06  | 1.13  | 1.03  | 0.82  | 0.96  | 0.85  | 1.04  | 0.13 |
| LVIDd (mm) | 3.48     | 4.03  | 3.15  | 3.58  | 3.75  | 3.96  | 3.84  | 3.80  | 3.70     | 0.29 | 3.26  | 3.55  | 3.62  | 3.62  | 3.62  | 3.87  | 3.79  | 3.62  | 3.72  | 3.76  | 3.64  | 0.17 |
| LVIDs (mm) | 1.82     | 2.66  | 1.74  | 2.14  | 2.12  | 2.39  | 2.14  | 2.28  | 2.16     | 0.30 | 2.23  | 2.23  | 2.34  | 2.09  | 2.09  | 2.41  | 2.27  | 2.09  | 2.30  | 2.38  | 2.24  | 0.12 |
| LVPWd (mm) | 0.89     | 0.82  | 0.92  | 0.89  | 0.95  | 0.96  | 0.96  | 0.95  | 0.92     | 0.05 | 0.92  | 0.96  | 1.03  | 0.92  | 1.03  | 0.78  | 0.82  | 0.78  | 0.92  | 0.82  | 0.90  | 0.09 |
| LVPWs (mm) | 1.11     | 1.10  | 1.05  | 1.11  | 1.03  | 1.15  | 1.04  | 1.06  | 1.08     | 0.04 | 1.10  | 0.99  | 1.21  | 1.21  | 1.28  | 1.17  | 0.89  | 1.31  | 1.03  | 0.96  | 1.12  | 0.14 |
| FS (%)     | 47.33    | 34.00 | 45.00 | 40.33 | 43.67 | 39.67 | 44.00 | 40.00 | 41.75    | 4.14 | 32.33 | 37.67 | 35.67 | 42.00 | 42.00 | 38.00 | 40.67 | 42.33 | 38.50 | 36.00 | 38.52 | 3.29 |
| Week 3     | DESP+DOX |       |       |       |       |       |       |       | Mean     | SD   | DOX   |       |       |       |       |       |       |       |       |       | Mean  | SD   |
| IVSd (mm)  | 0.83     | 0.74  | 0.83  | 0.78  | 0.92  | 0.92  | 0.84  | 0.96  | 0.85     | 0.08 | 0.78  | 0.74  | 0.92  | 0.82  | 0.78  | 0.85  | 0.74  | 0.78  | 0.78  | 0.82  | 0.80  | 0.05 |
| IVSs (mm)  | 1.11     | 1.12  | 1.27  | 1.05  | 1.23  | 1.28  | 1.28  | 1.36  | 1.21***  | 0.11 | 0.82  | 1.03  | 1.21  | 0.82  | 1.10  | 0.89  | 0.85  | 0.96  | 1.06  | 0.92  | 0.97  | 0.13 |
| LVIDd (mm) | 3.97     | 4.22  | 3.31  | 3.88  | 3.90  | 3.53  | 3.76  | 4.09  | 3.83     | 0.30 | 3.83  | 3.23  | 4.18  | 4.15  | 3.90  | 2.80  | 3.83  | 3.55  | 3.58  | 3.33  | 3.64  | 0.43 |
| LVIDs (mm) | 2.70     | 2.73  | 1.75  | 3.24  | 2.36  | 2.45  | 2.34  | 2.41  | 2.50     | 0.42 | 2.59  | 2.30  | 3.12  | 3.19  | 2.45  | 1.84  | 2.70  | 2.48  | 2.55  | 2.48  | 2.57  | 0.39 |
| LVPWd (mm) | 0.75     | 0.83  | 0.89  | 0.89  | 0.83  | 0.81  | 0.77  | 0.89  | 0.83     | 0.05 | 0.82  | 0.89  | 0.89  | 0.71  | 0.82  | 1.06  | 0.82  | 0.78  | 0.82  | 1.03  | 0.86  | 0.11 |
| LVPWs (mm) | 1.00     | 1.02  | 1.12  | 1.06  | 0.91  | 0.96  | 1.05  | 1.10  | 1.03**   | 0.07 | 0.82  | 0.82  | 0.78  | 0.74  | 0.99  | 1.03  | 0.89  | 0.92  | 0.96  | 0.96  | 0.89  | 0.10 |
| FS (%)     | 32.00    | 35.00 | 47.33 | 25.00 | 39.33 | 30.67 | 38.00 | 41.00 | 36.04*** | 6.92 | 32.00 | 28.00 | 25.00 | 23.50 | 36.50 | 34.50 | 30.25 | 29.50 | 28.33 | 26.67 | 29.43 | 4.06 |

IVSd, LV interventricular septum thicknesses at diastole; IVSs, LV interventricular septum thicknesses at systole; LVIDd, LV internal dimensions at diastole; LVIDs, LV internal dimensions at systole; LVPWd, LV posterior wall thicknesses at diastole; LVPWs, LV posterior wall thicknesses at systole; and FS, fractional shortening; and \*, significant difference between groups (DESP+DOX *versus* DOX) by t-test, \* $P < 0.05$ , \*\* $P \leq 0.01$ , \*\*\* $P \leq 0.001$ .

**A**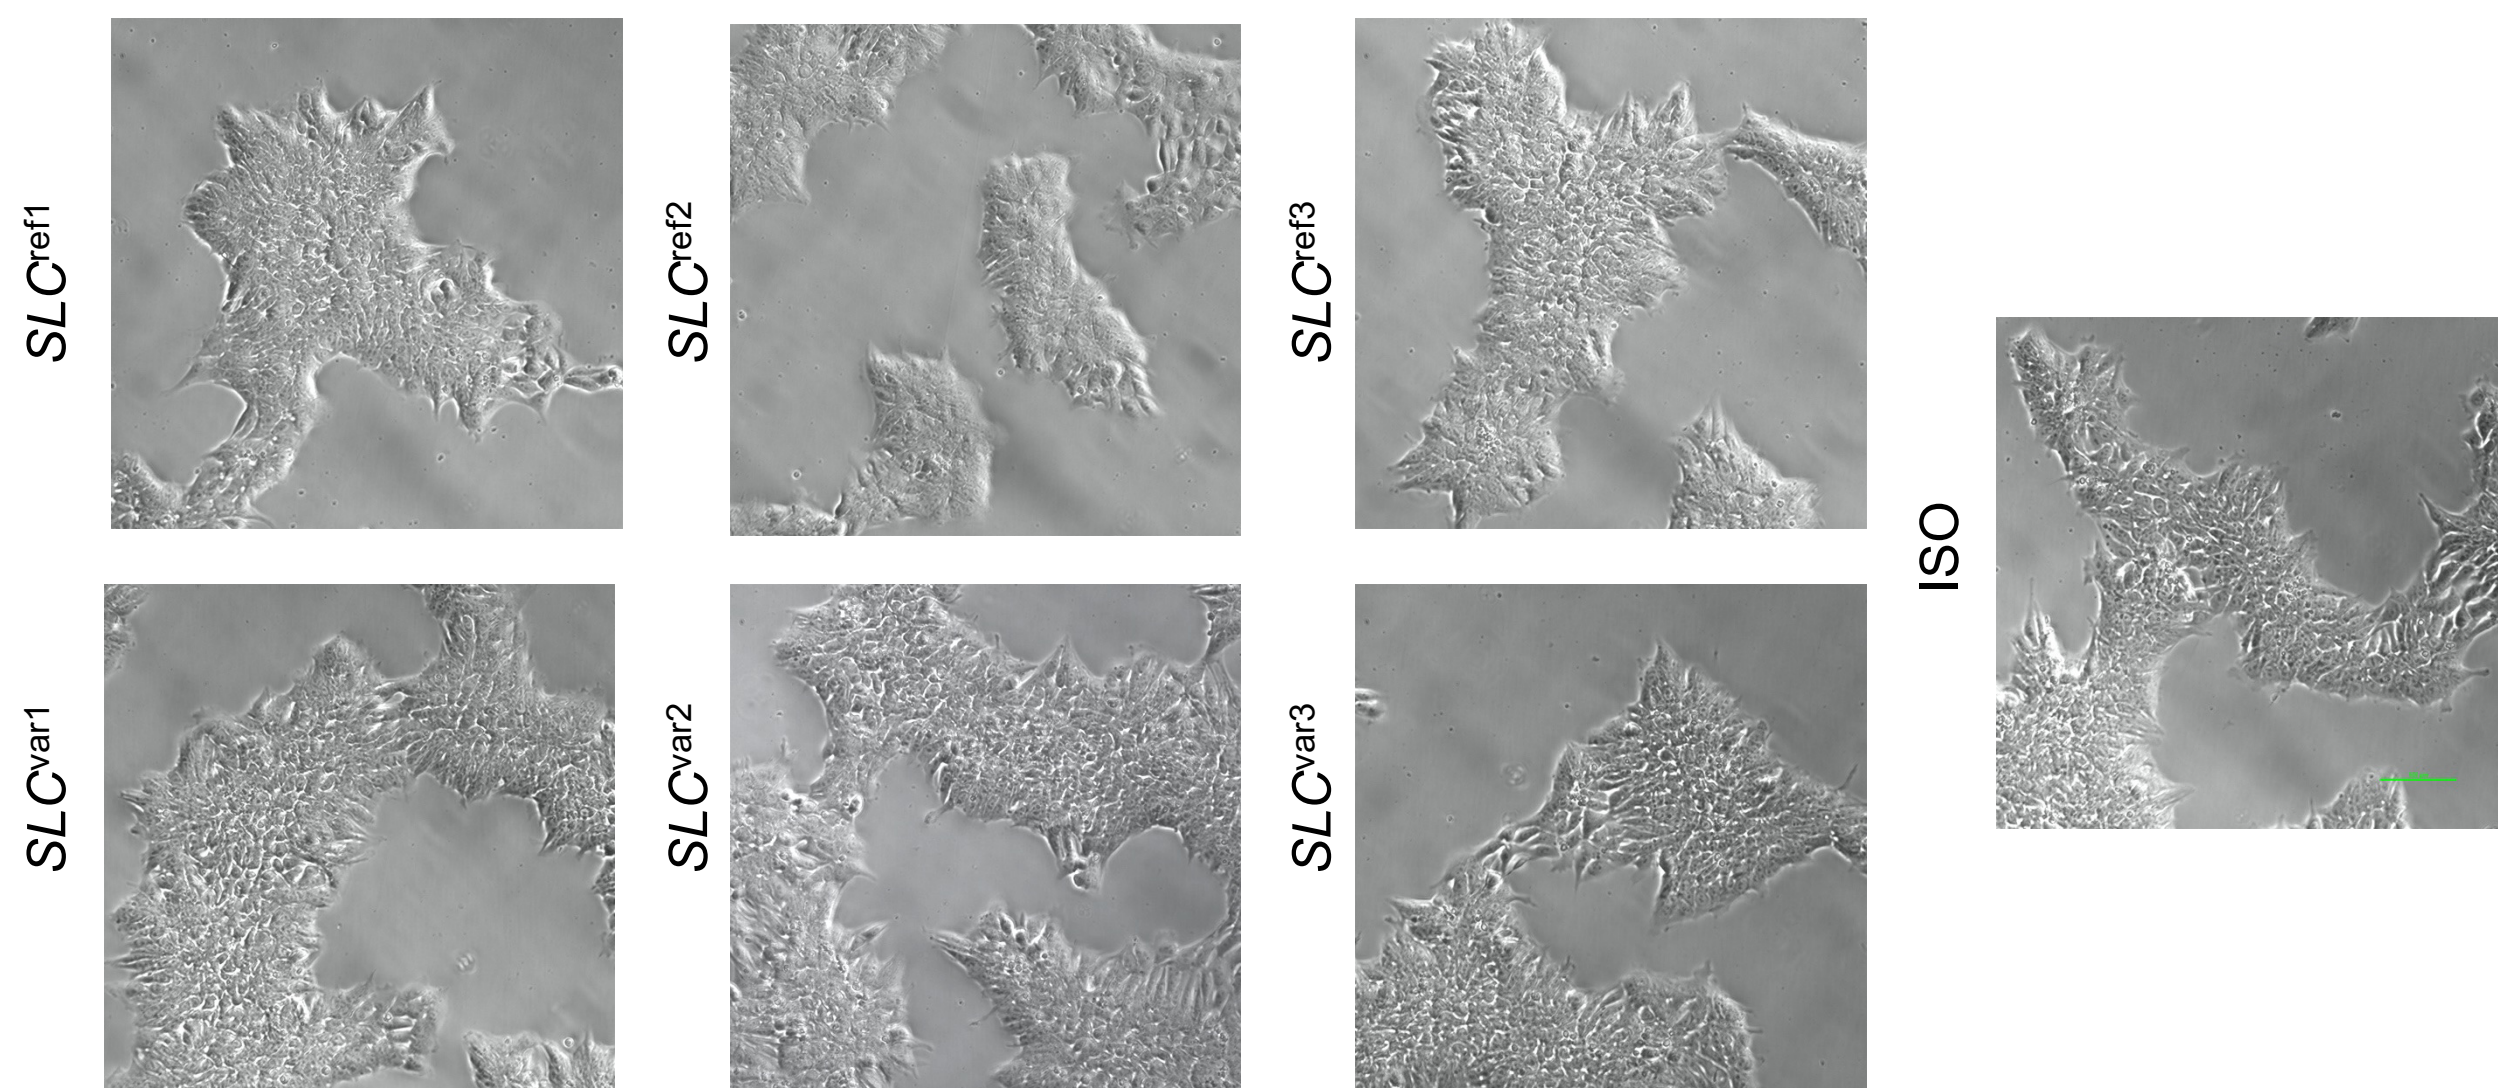**B**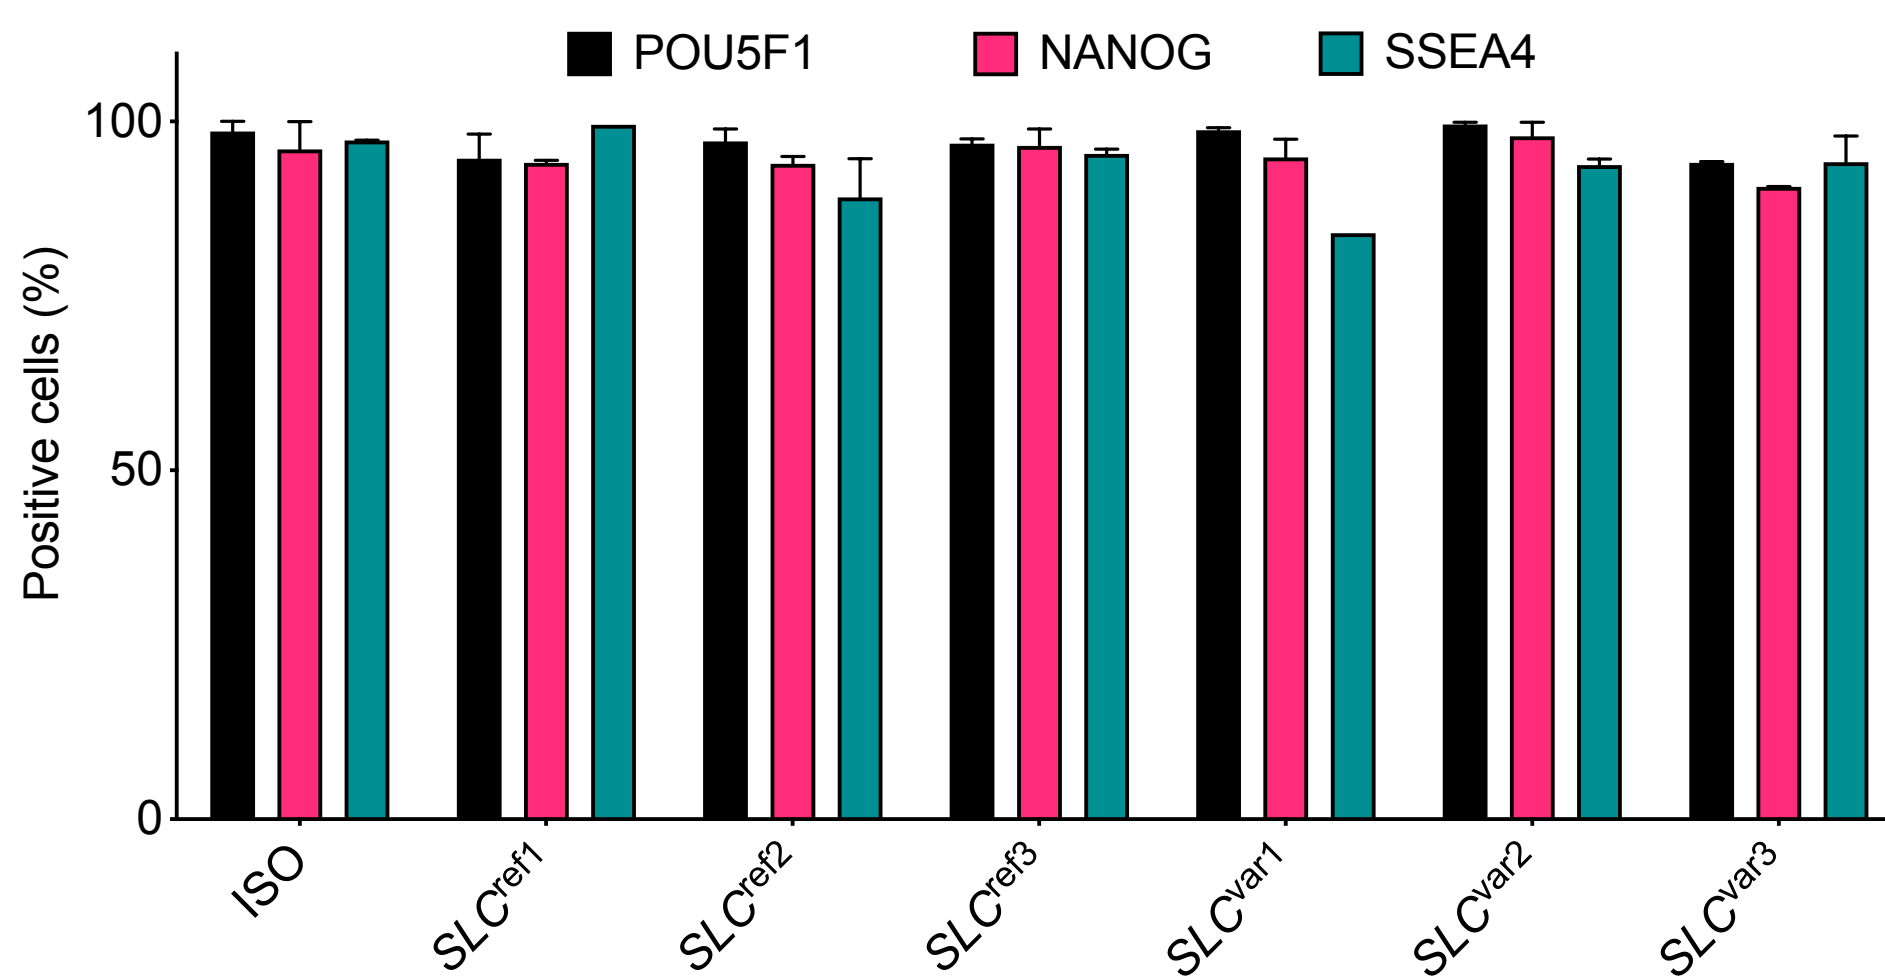**C**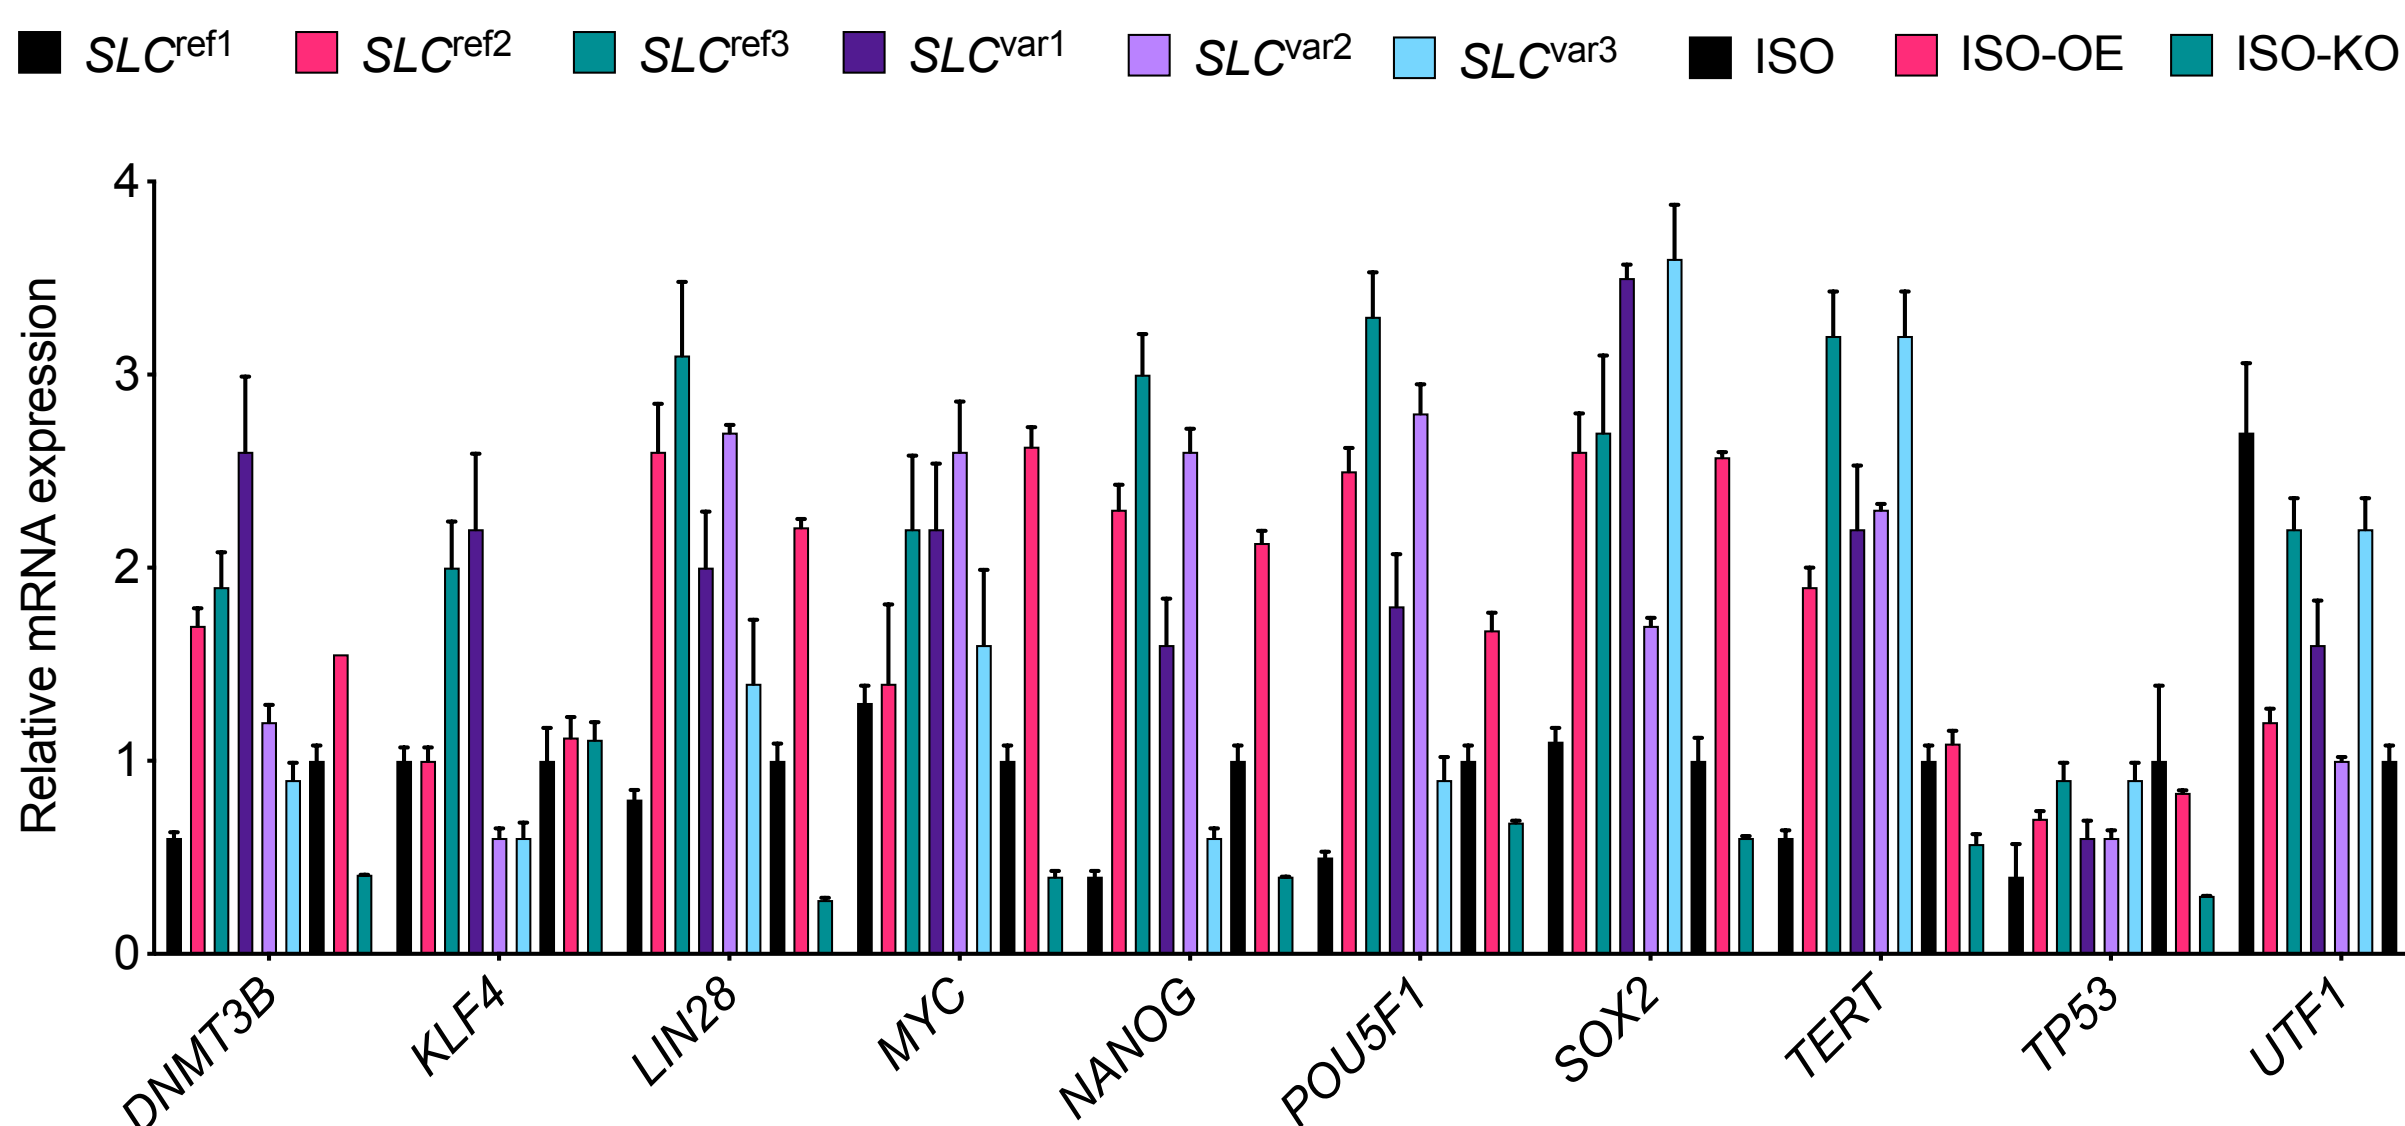

**Supplementary Figure 1. Generation and characterization of patient-specific hiPSCs.** **A**, Phase contrast images of patient-specific hiPSC lines derived under chemically defined conditions. Scale bar, 100  $\mu$ m. **B**, Flow cytometry analysis of markers of undifferentiated cells, POU5F1, NANOG, and SSEA4, in all hiPSC lines. **C**, Real-time PCR assessment of the expression levels of genes associated with the undifferentiated state in all hiPSC lines, relative to control isogenic hiPSC line.  $n = 3$  replicates for each hiPSC line. Error bars represent s.e.m. of experimental replicates.

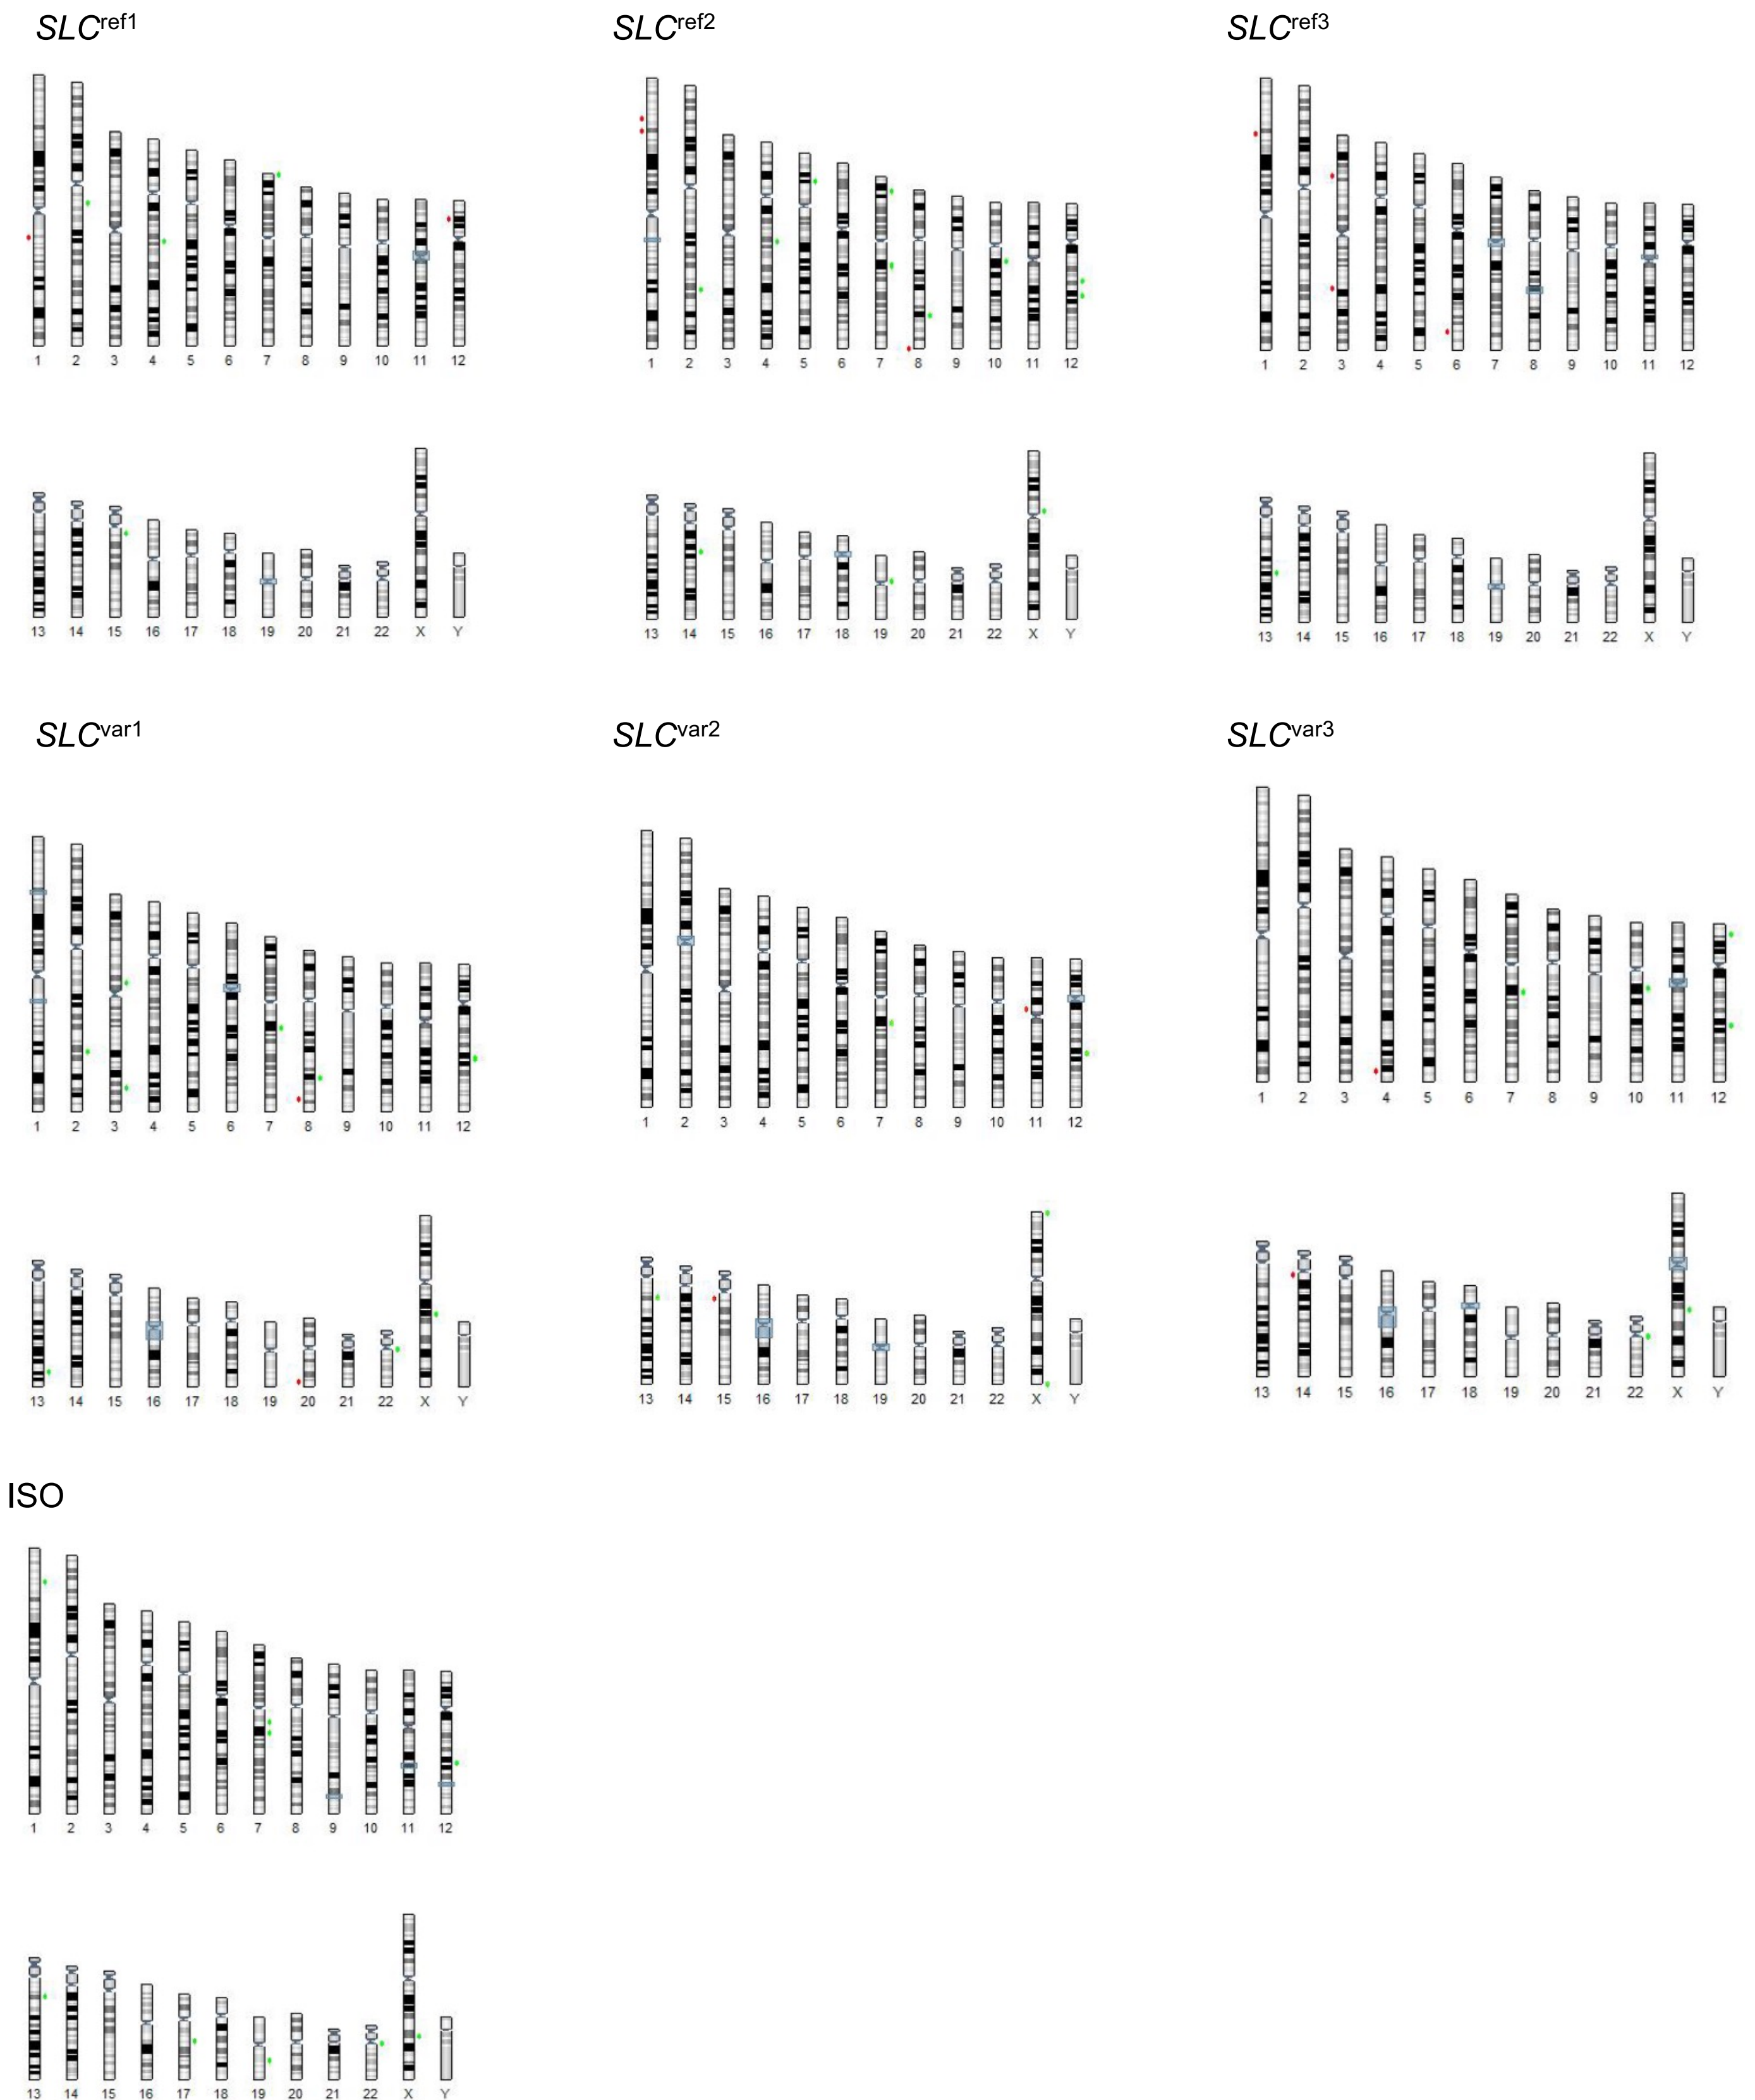

**Supplementary Figure 2. Karyotype analysis of patient-specific hiPSC lines.** SNP-based karyotype analysis of all patient-derived hiPSC lines (passage > 20) demonstrating normal karyotype after reprogramming. Karyotyping was assessed using a whole-genome Infinium HumanCytoSNP-12 BeadChip Array (Illumina) covering 300,000 SNPs.

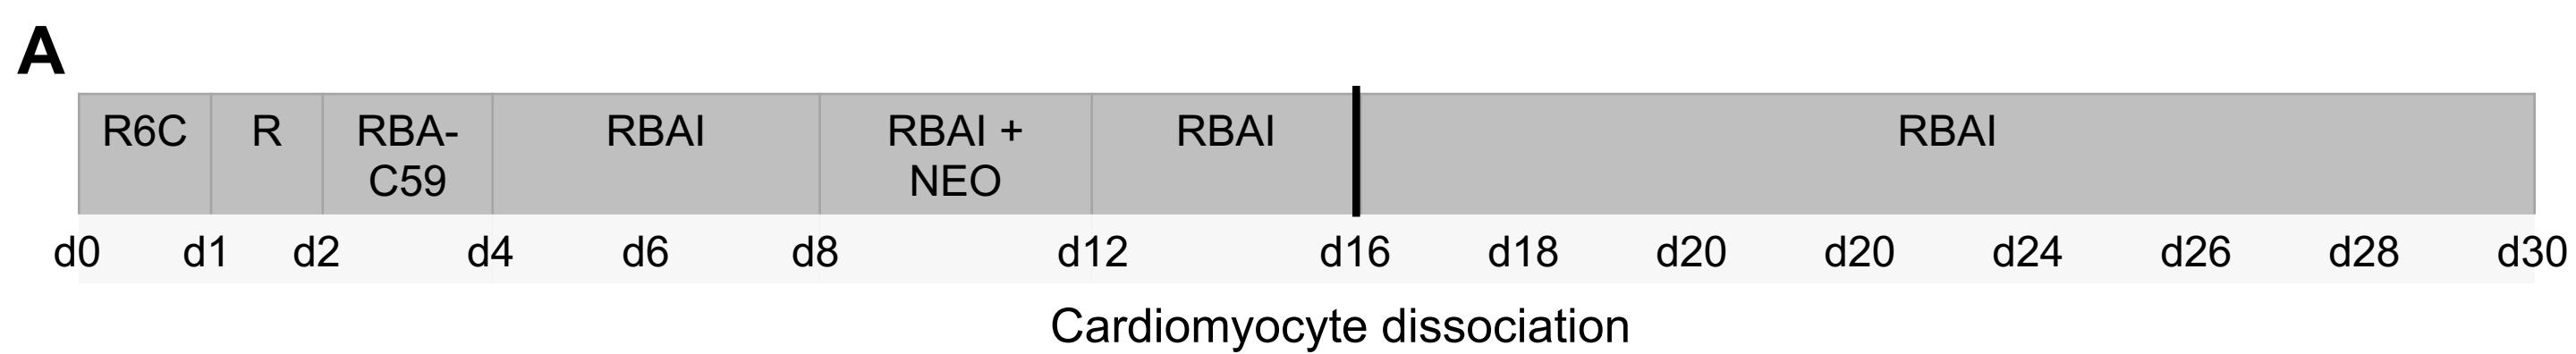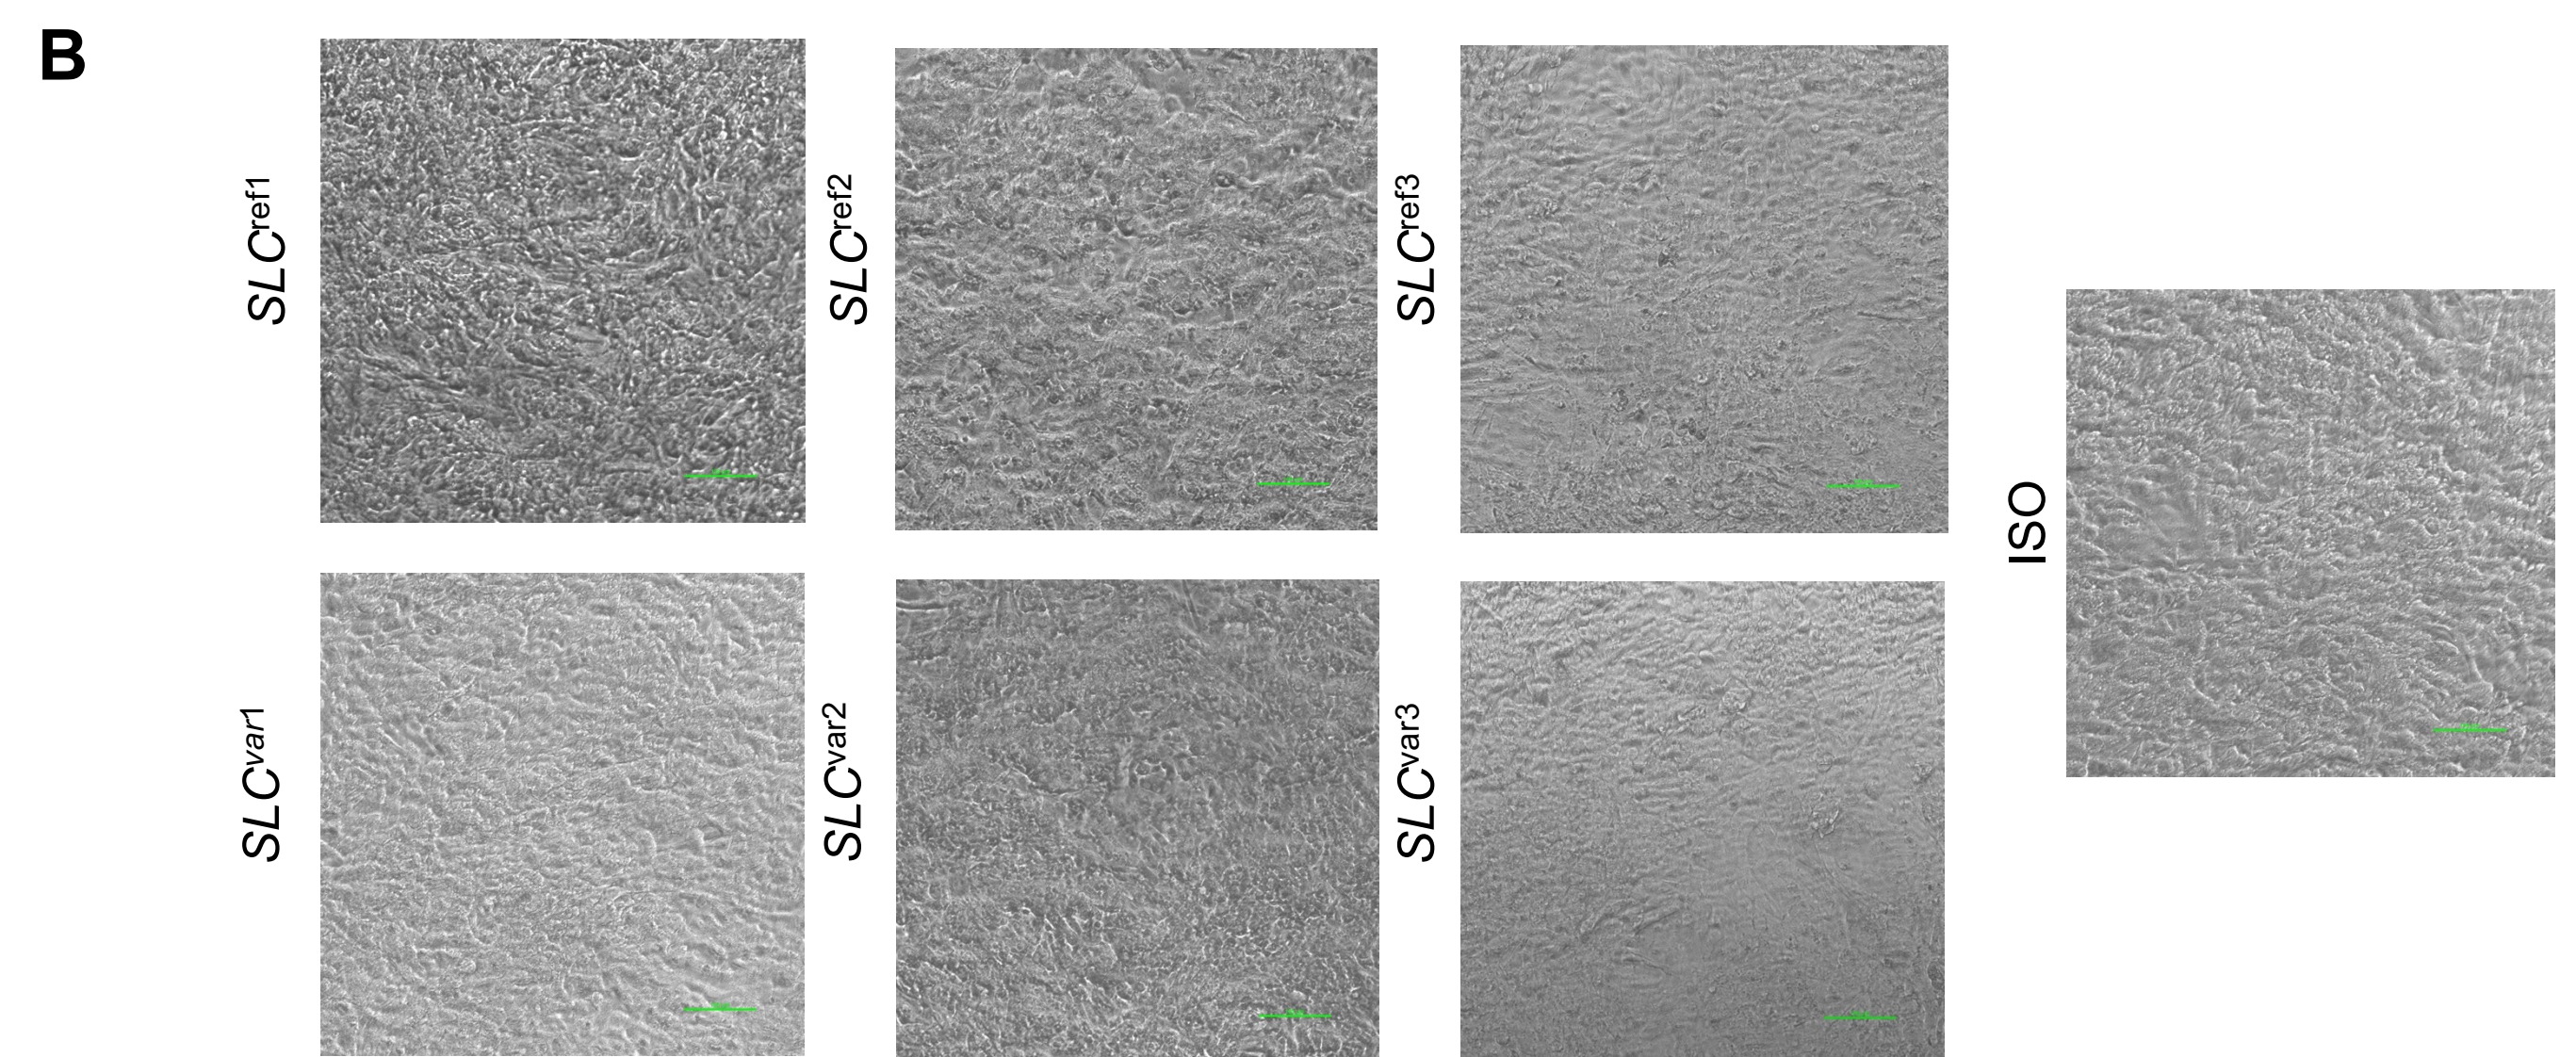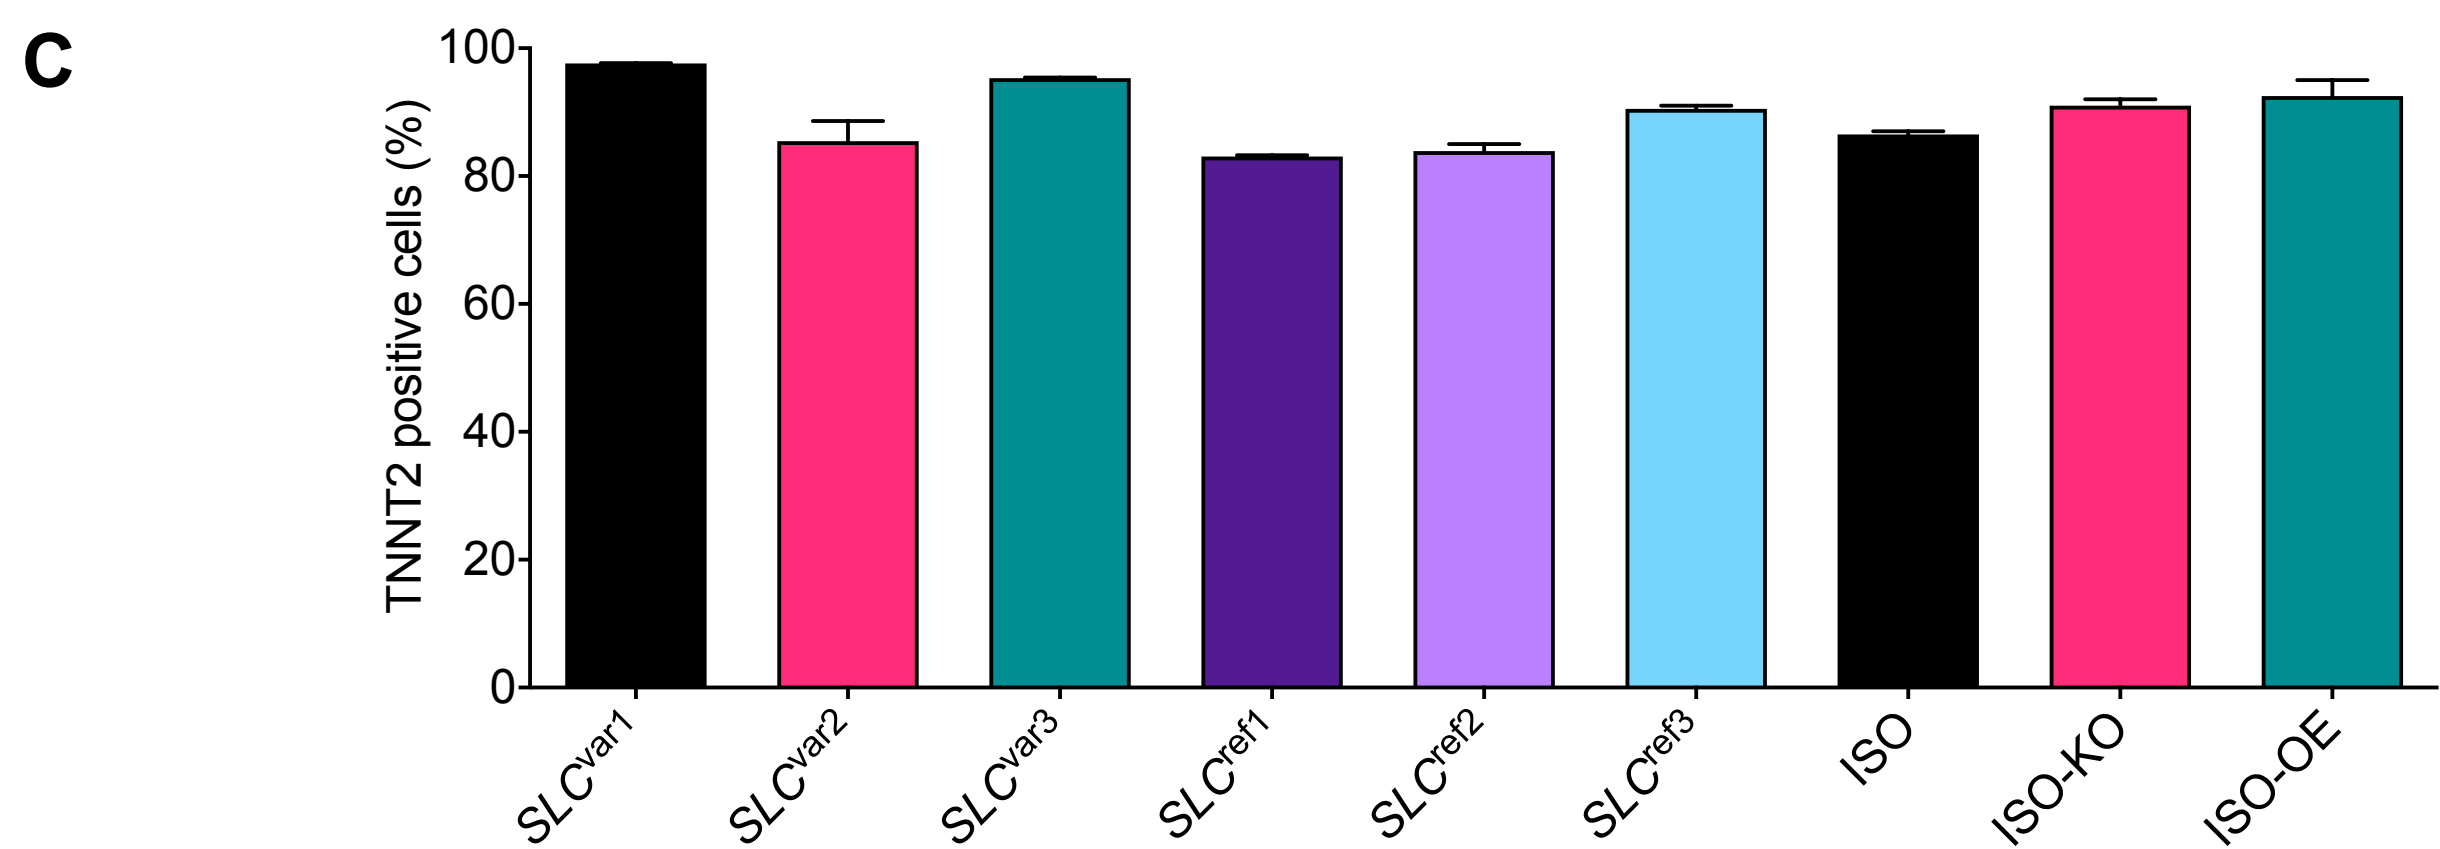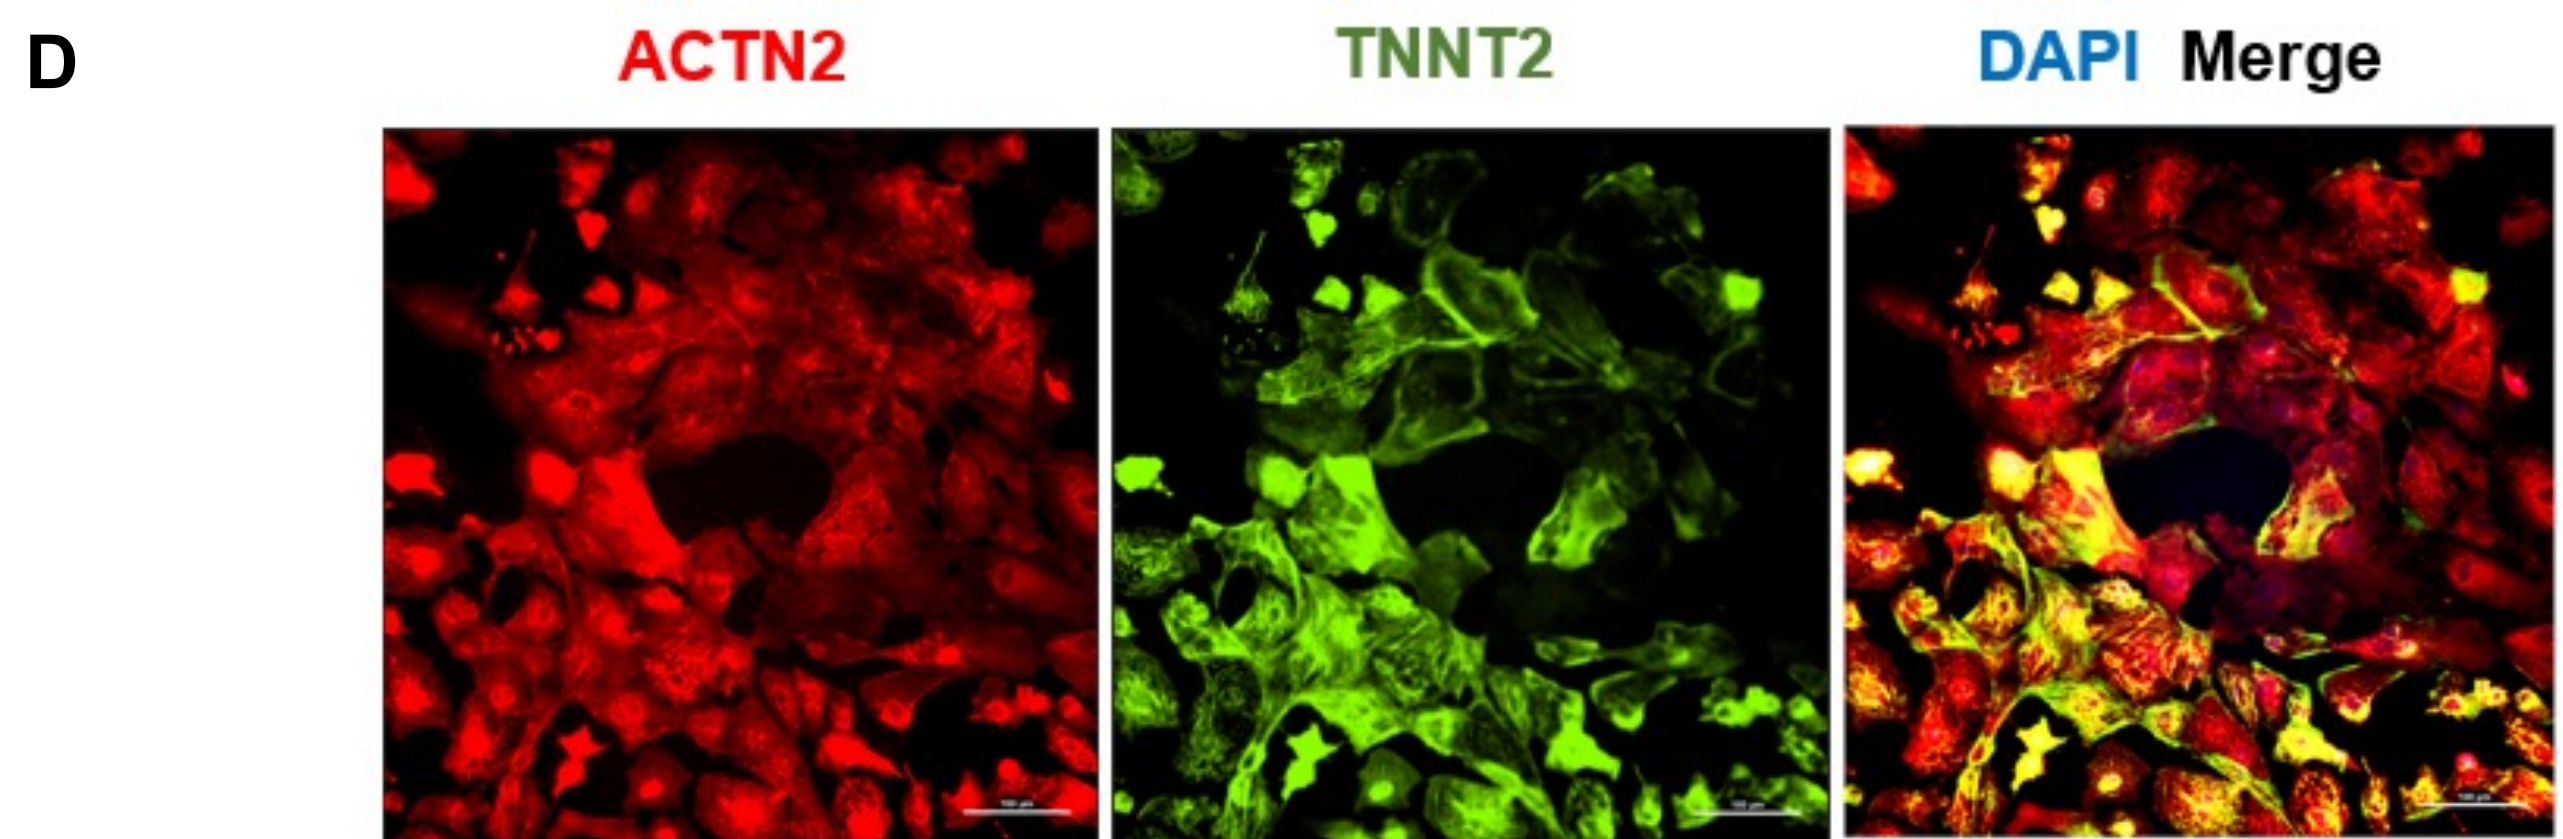

**Supplementary Figure 3. Generation and characterization of patient-specific hiPSC-CMs.** **A**, Schematic of our cardiac differentiation protocol (details in Methods). **B**, Representative phase contrast images of day 30 cardiomyocyte monolayers differentiated from all hiPSC lines. Scale bar, 100  $\mu$ m. **C**, Flow cytometry analysis for the percentage of the cardiac troponin T (TNNT2) positive cells derived from all hiPSC lines,  $n = 3$  replicates for each line. Error bars represent s.e.m. of experimental replicates. **D**, Representative immunofluorescent staining images for cardiac markers troponin T (TNNT2) and  $\alpha$ -actinin (ACTN2). Scale bar, 25  $\mu$ m.

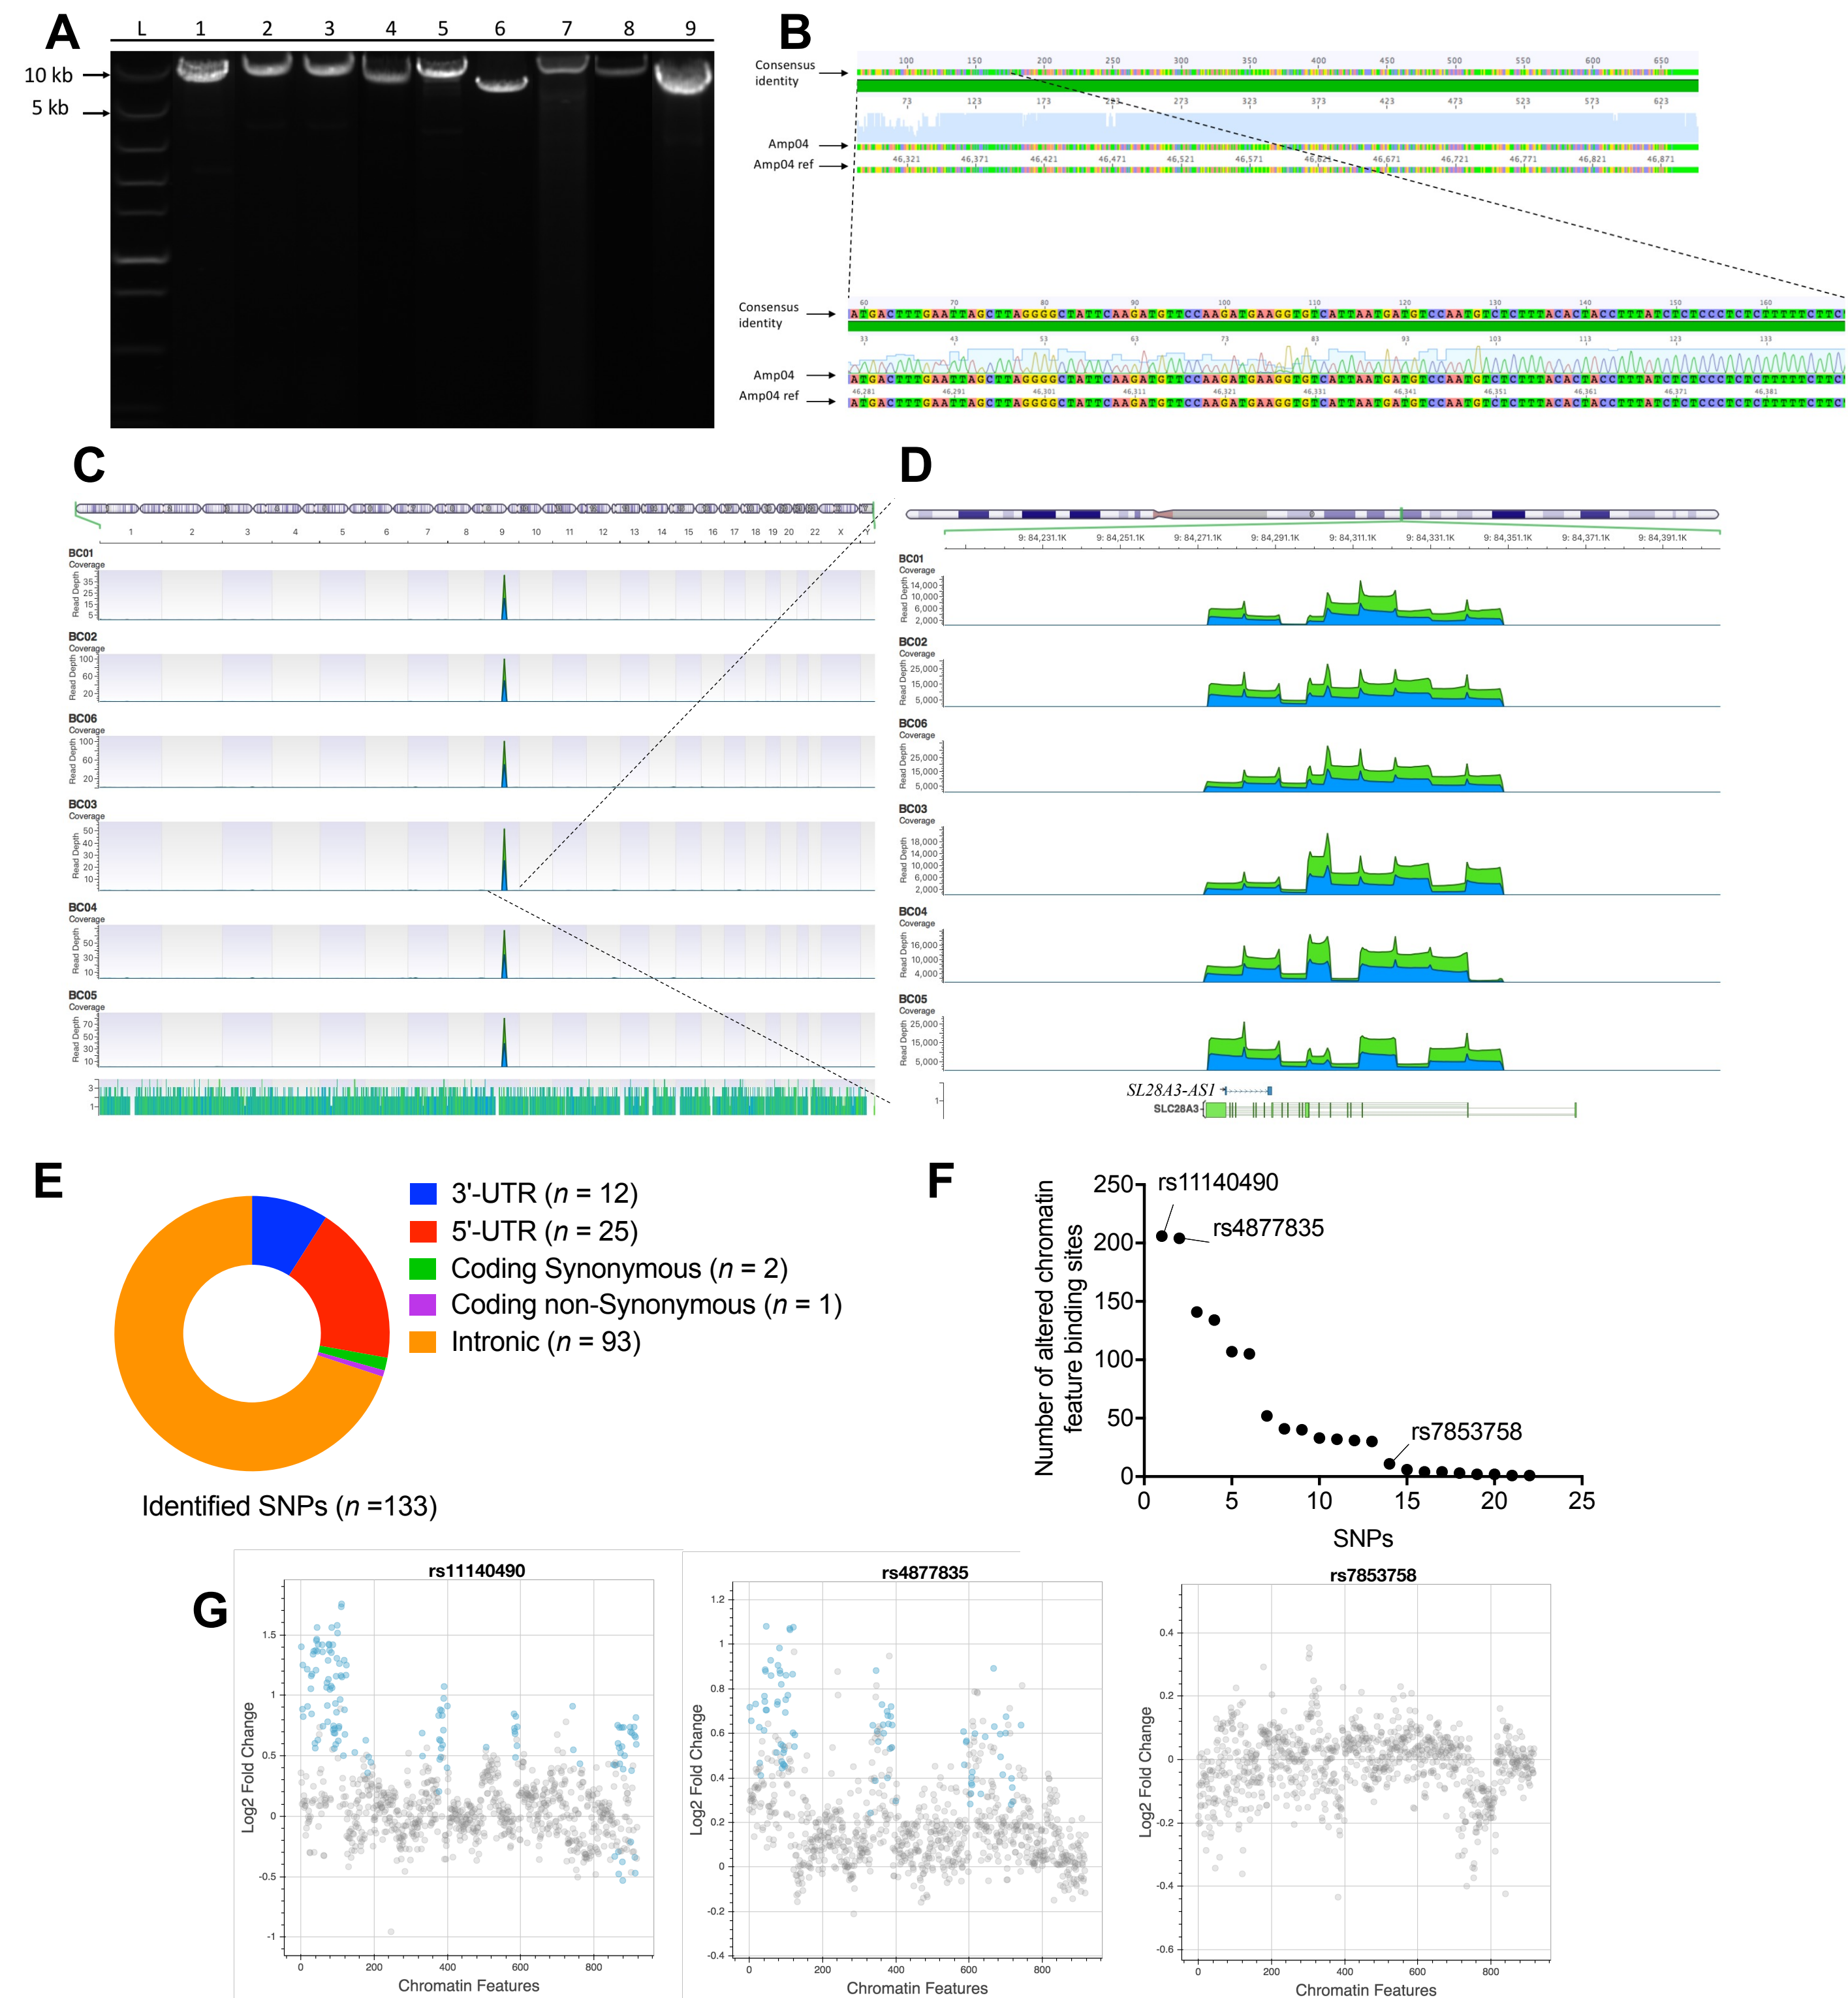

**Supplementary Figure 4. *SLC28A3* gene resequencing.** **A**, Exemplary agarose gel picture for all nine overlapping *SLC28A3* amplicons generated from one sample. L, ladder; 1–9, amplicons one to nine. **B**, Exemplary pre-nanopore sequencing amplicon validation by sanger sequencing for amplicon number four (Amp04). Top panel shows the first ~600 bp of generated amplicon four (AMP04) aligned to its reference sequence (AMP04 ref). Bottom panel shows a zoom-in view for the first ~100 bp of generated amplicon four perfectly matching its reference sequence. **C**, Long range PCR-based target enrichment for *SLC28A3* amplicons aligned to reference human genome (GRCh38) showing depth of coverage peaks at chr9: 84,274,029- 545 84,349,802. **D**, Zoom-in view at locus chr9: 84,274,029-84,349,802 encompassing *SLC28A3*. **E**, Consequence and location of identified SNPs ( $n = 133$ ). **F**, Functional chromatin regulatory analysis for the candidate SNPs showing the number of chromatin binding sites significantly altered by candidate SNPs. **G**, Effect of candidate SNPs, rs11140490, rs4877835, and rs7853758 on chromatin feature binding sites. Log2 fold change measure the fold change in the probability of observing a binding site for relevant chromatin feature between reference and alternative allele for a particular SNP (adapted from Magdy et al.<sup>23</sup>).

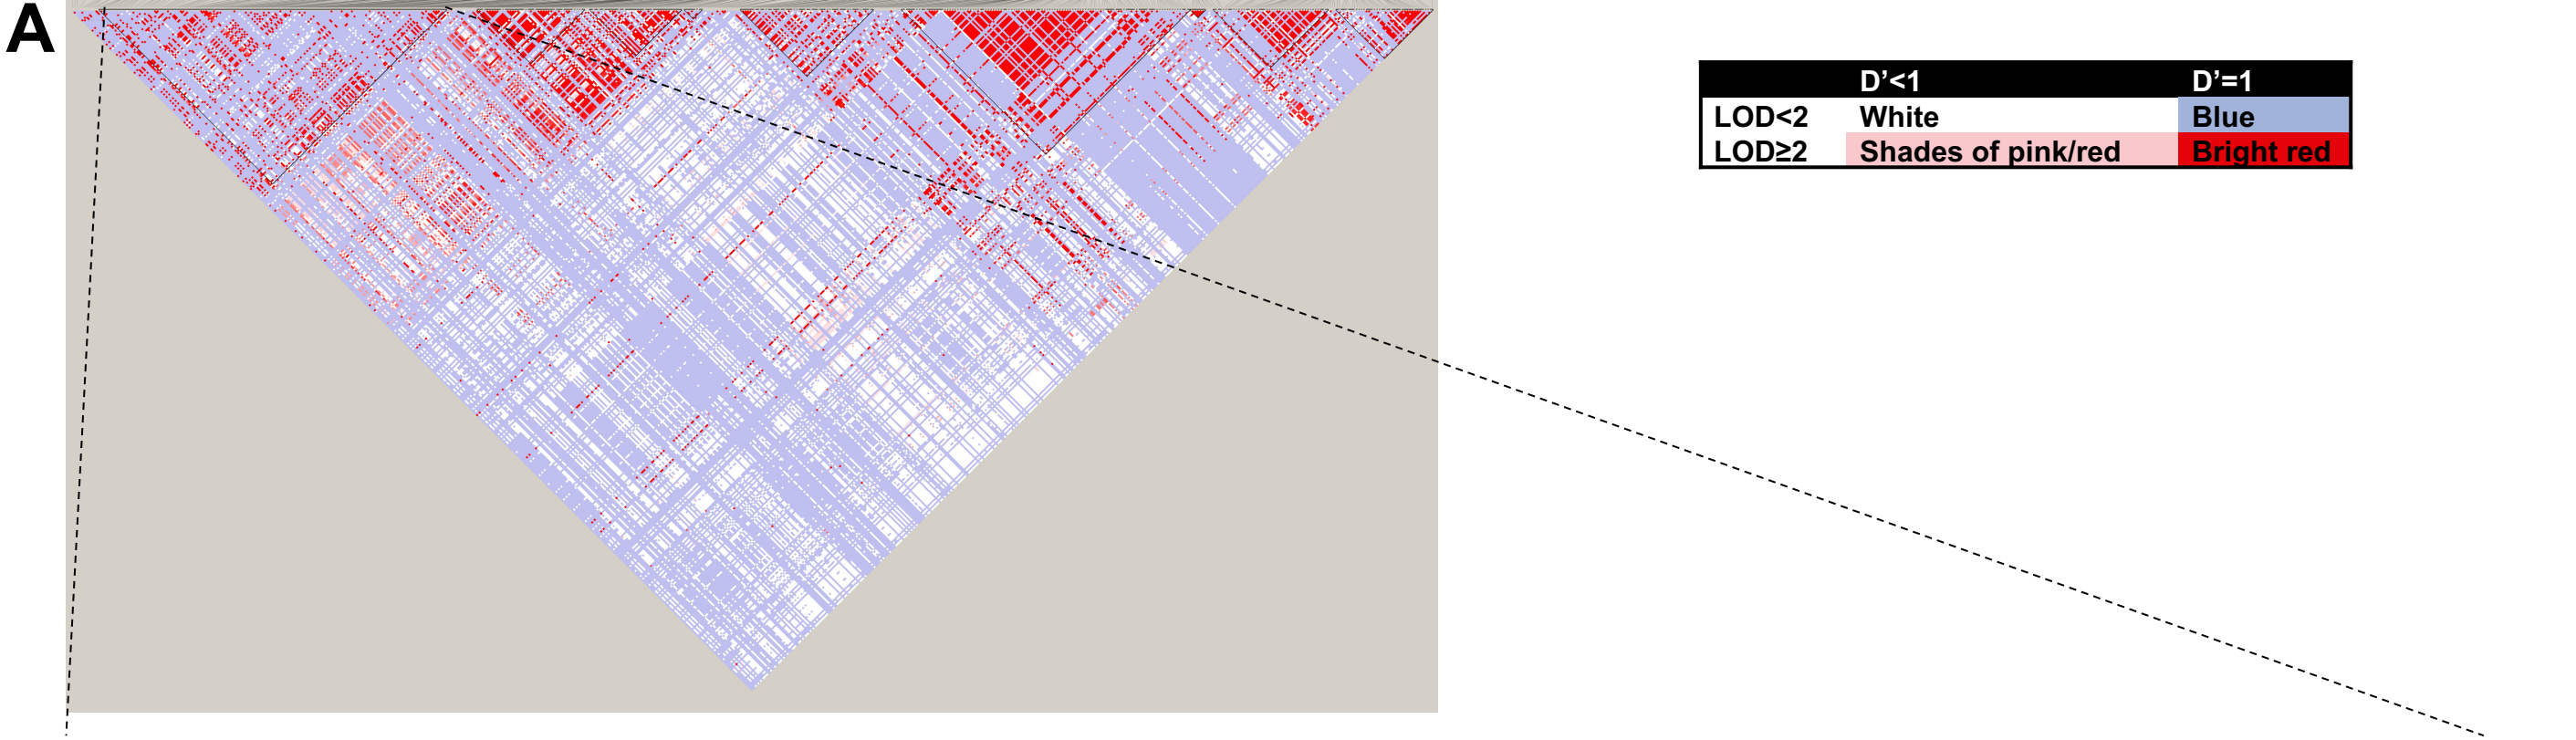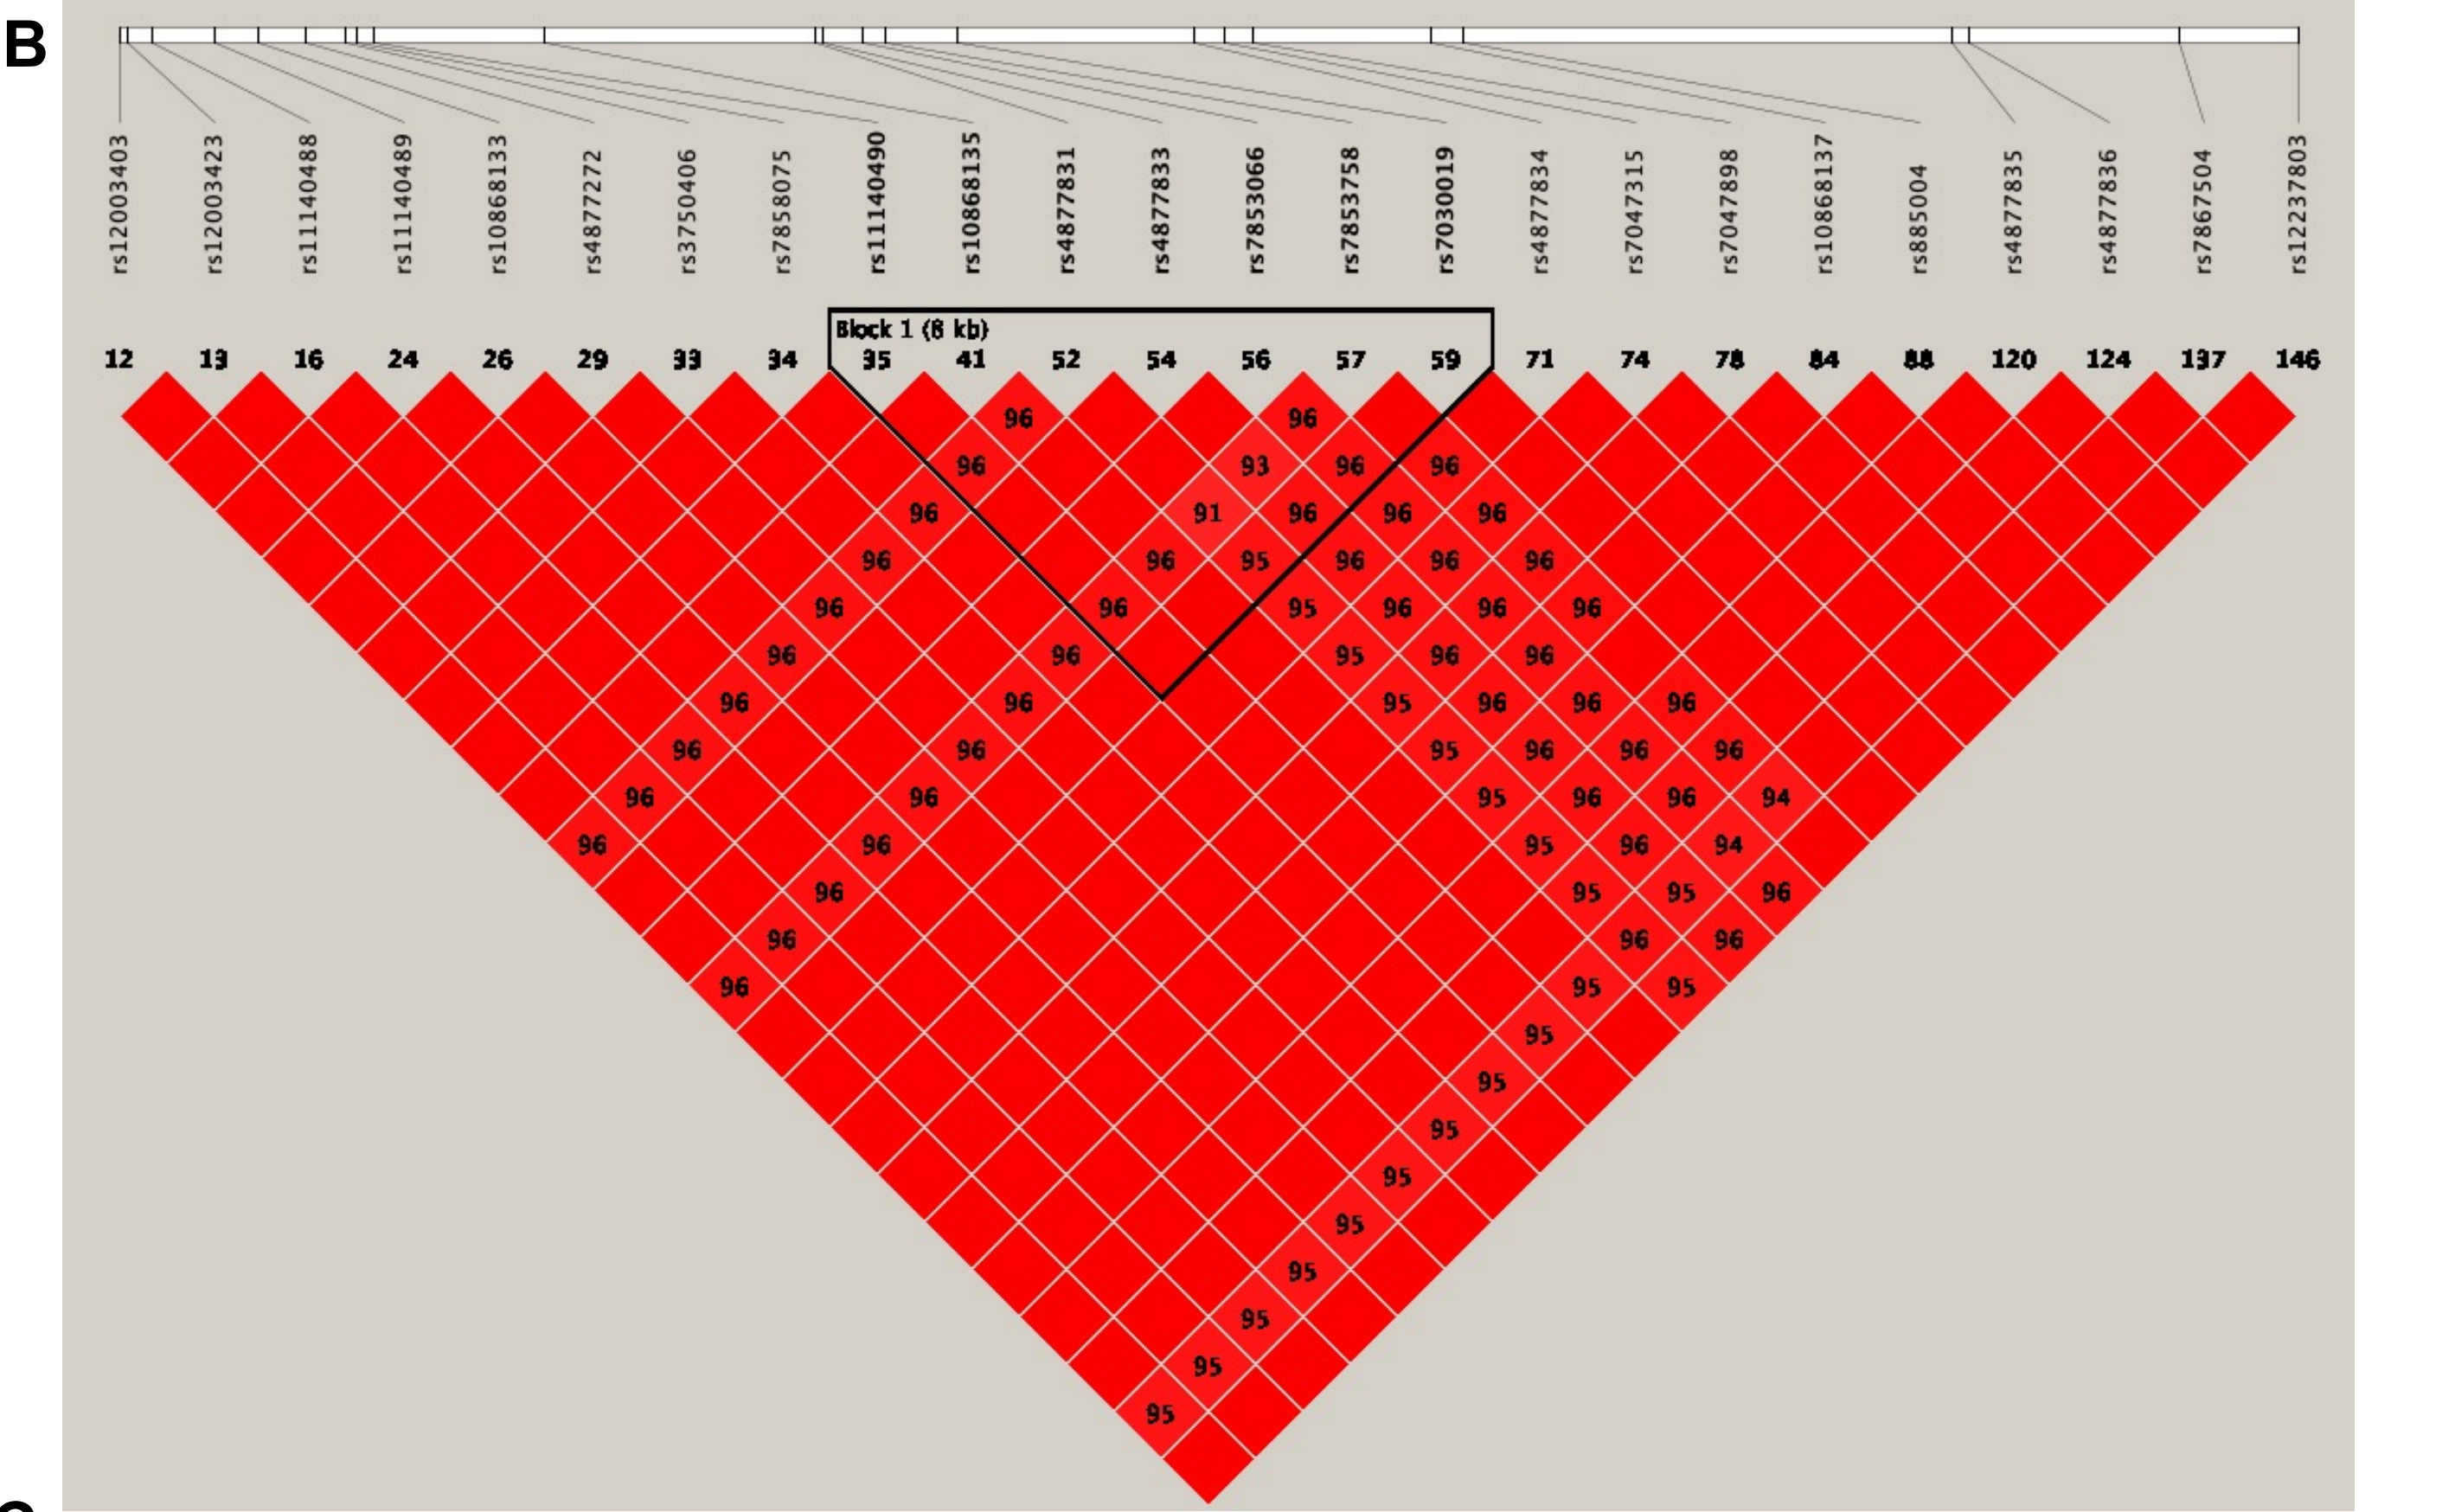

**C**

| Haplotype Id | rs11140490, (35, A>G) | rs10868135 (41, T>C) | rs4877831 (52, C>G) | rs4877833 (54, T>C) | rs7853066 (56, A>G) | <b>rs7853758 (57, G&gt;A)</b> | rs7030019 (59, A>G) | Haplotype Frequency (%) |
|--------------|-----------------------|----------------------|---------------------|---------------------|---------------------|-------------------------------|---------------------|-------------------------|
| I            | A                     | T                    | C                   | T                   | A                   | G                             | A                   | 71.7                    |
| II           | G                     | C                    | G                   | C                   | G                   | A                             | G                   | 17.7                    |
| III          | A                     | T                    | G                   | T                   | A                   | G                             | A                   | 7.1                     |
| IV           | G                     | C                    | G                   | C                   | A                   | G                             | A                   | 2                       |
| V            | G                     | C                    | G                   | C                   | G                   | G                             | A                   | 0.5                     |
| VI           | A                     | T                    | C                   | T                   | A                   | A                             | A                   | 0.5                     |
| VII          | G                     | C                    | C                   | T                   | A                   | A                             | G                   | 0.5                     |

**Supplementary Figure 5. Haplotype structure at *SLC28A3* / *SLC28A3-AS1* locus.** **A**, Pairwise linkage disequilibrium ( $D'$ ) for all SNPs spread over ~100 kb encompassing *SLC28A3* / *SLC28A3-AS1* locus. The linkage disequilibrium ( $D'$ ) is indicated in the small boxes colored red or blue (a color legend is provided). LOD, log of the likelihood odds ratio. **B**, LD haplotype structure for Hap<sup>*SLC28A3*</sup> that is spread over 32 kb and comprising 24 SNPs that are co-inherited only in cardio protected patients. The reference SNP numbers (rs) are indicated on top. Hap<sup>*SLC28A3-AS1*</sup> (outlined by black triangle) spread over 8 kb and is composed of seven SNPs that are located within a long non-coding RNA, *SLC28A3-AS* that overlaps with *SLC28A3*. **C**, Haplotype structure and allelic frequency of Hap<sup>*SLC28A3-AS1*</sup> showing seven haplotype structures, [ Hap-I<sup>*SLC28A3-AS1*</sup> to Hap-VII<sup>*SLC28A3-AS1*</sup> ]. Each SNP is labeled as follow; rs id (SNP number on the LD block in Fig. b, reference allele > variant allele). SNP rs7853758 (in bold) is the primary GWAS hit. For each SNP, variant alleles are in red (adapted from Magdy et al.<sup>23</sup>).

**A**

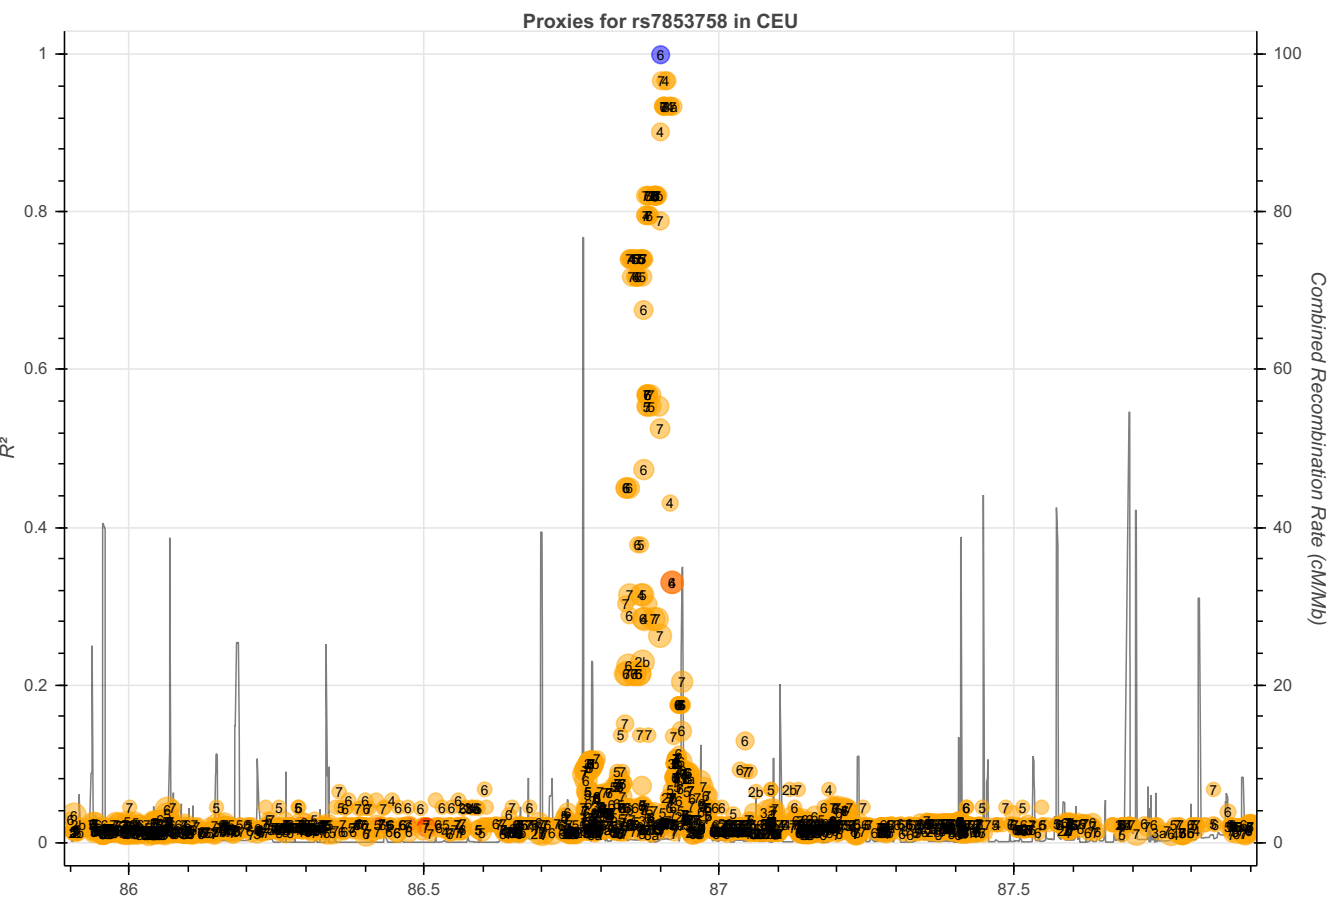

**B**

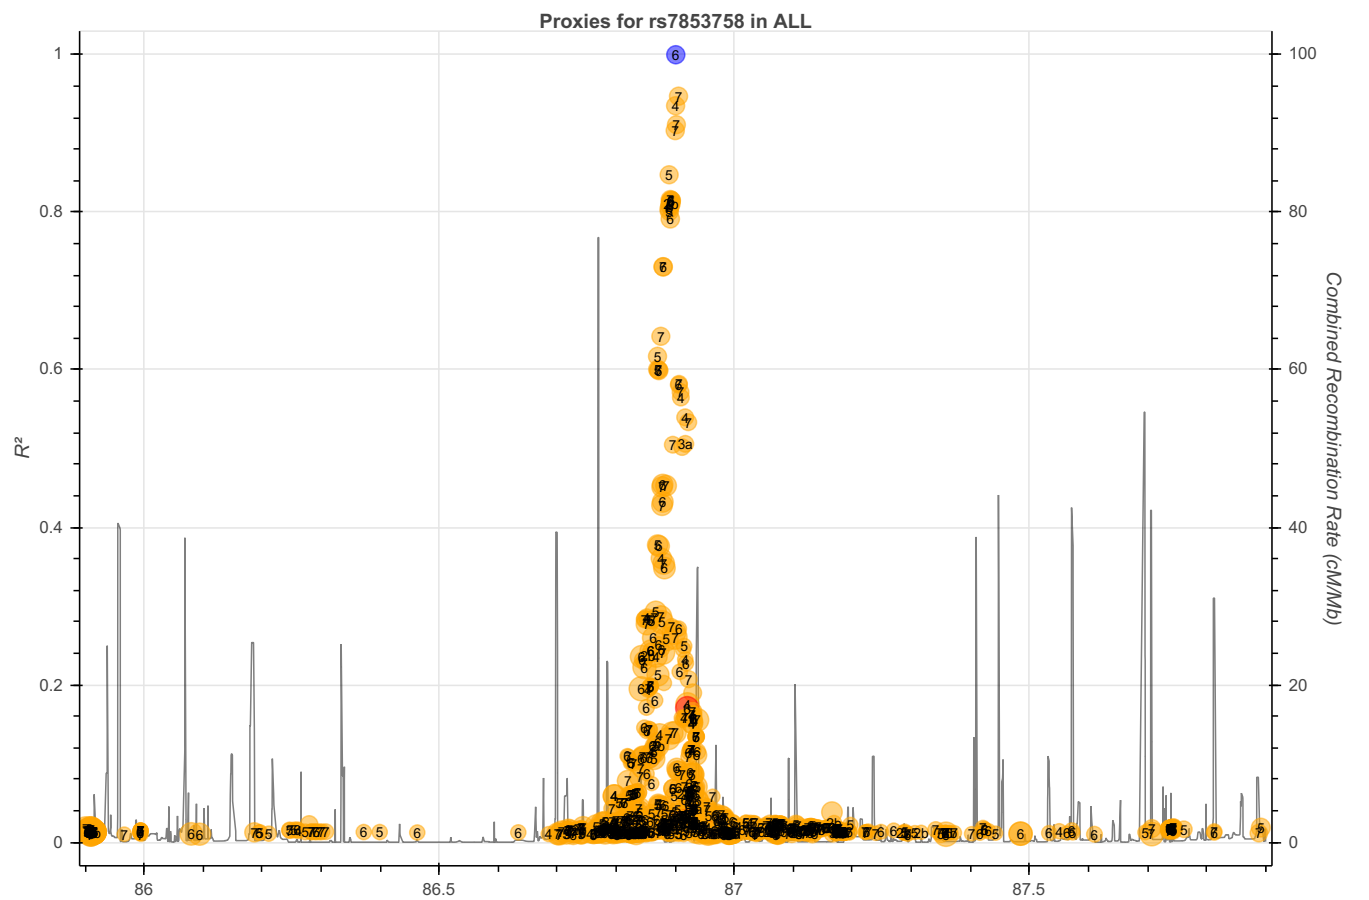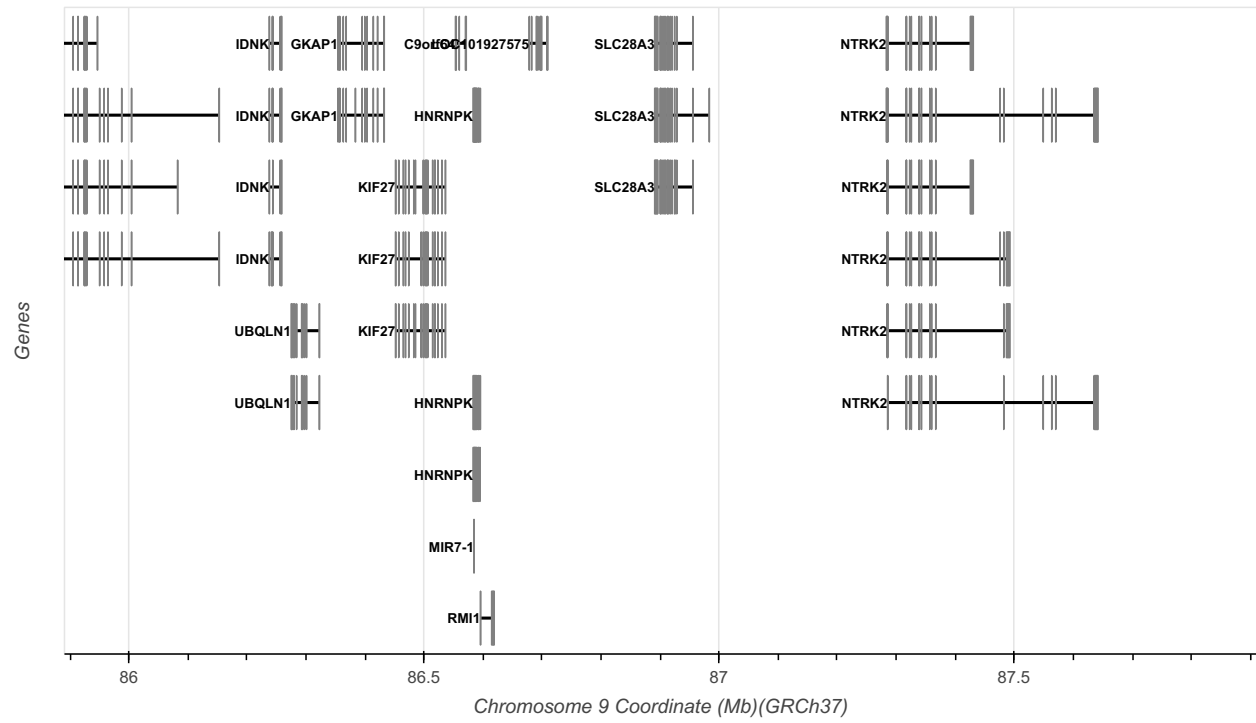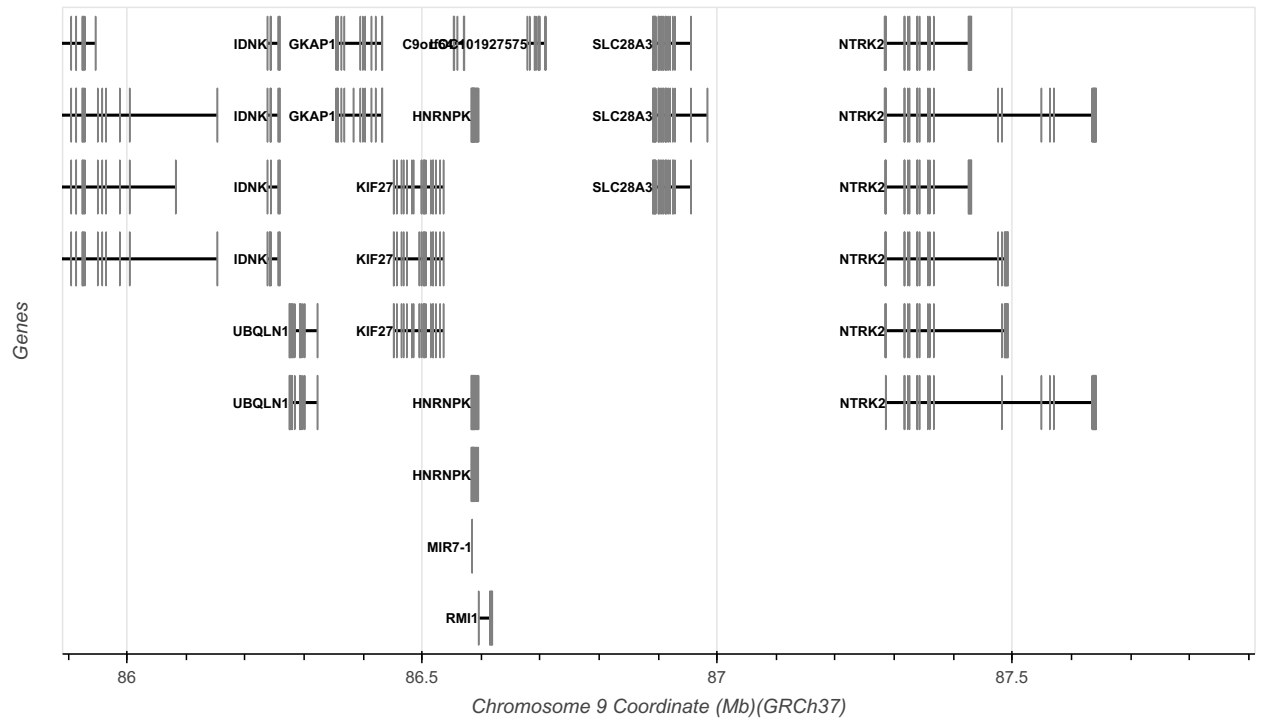

**Supplementary Figure 6. Extended Linkage disequilibrium (LD) analysis over 2 Mb on chromosome 9.** Linkage disequilibrium for variants located within 1 Mb up and down-stream the *SLC28A3* / *SLC28A3-AS1* locus in CEU/European population **(A)** and in All ethnicity population **(B)**. For each plot the LD Co-efficient ( $R^2$ ) is represented on the left Y-axis and the genomic coordinates are represented on the x-axis. Each yellow circle denotes for a single SNP within the target locus. The original CGAS hit, rs7853758 is represented by a purple circle.

A

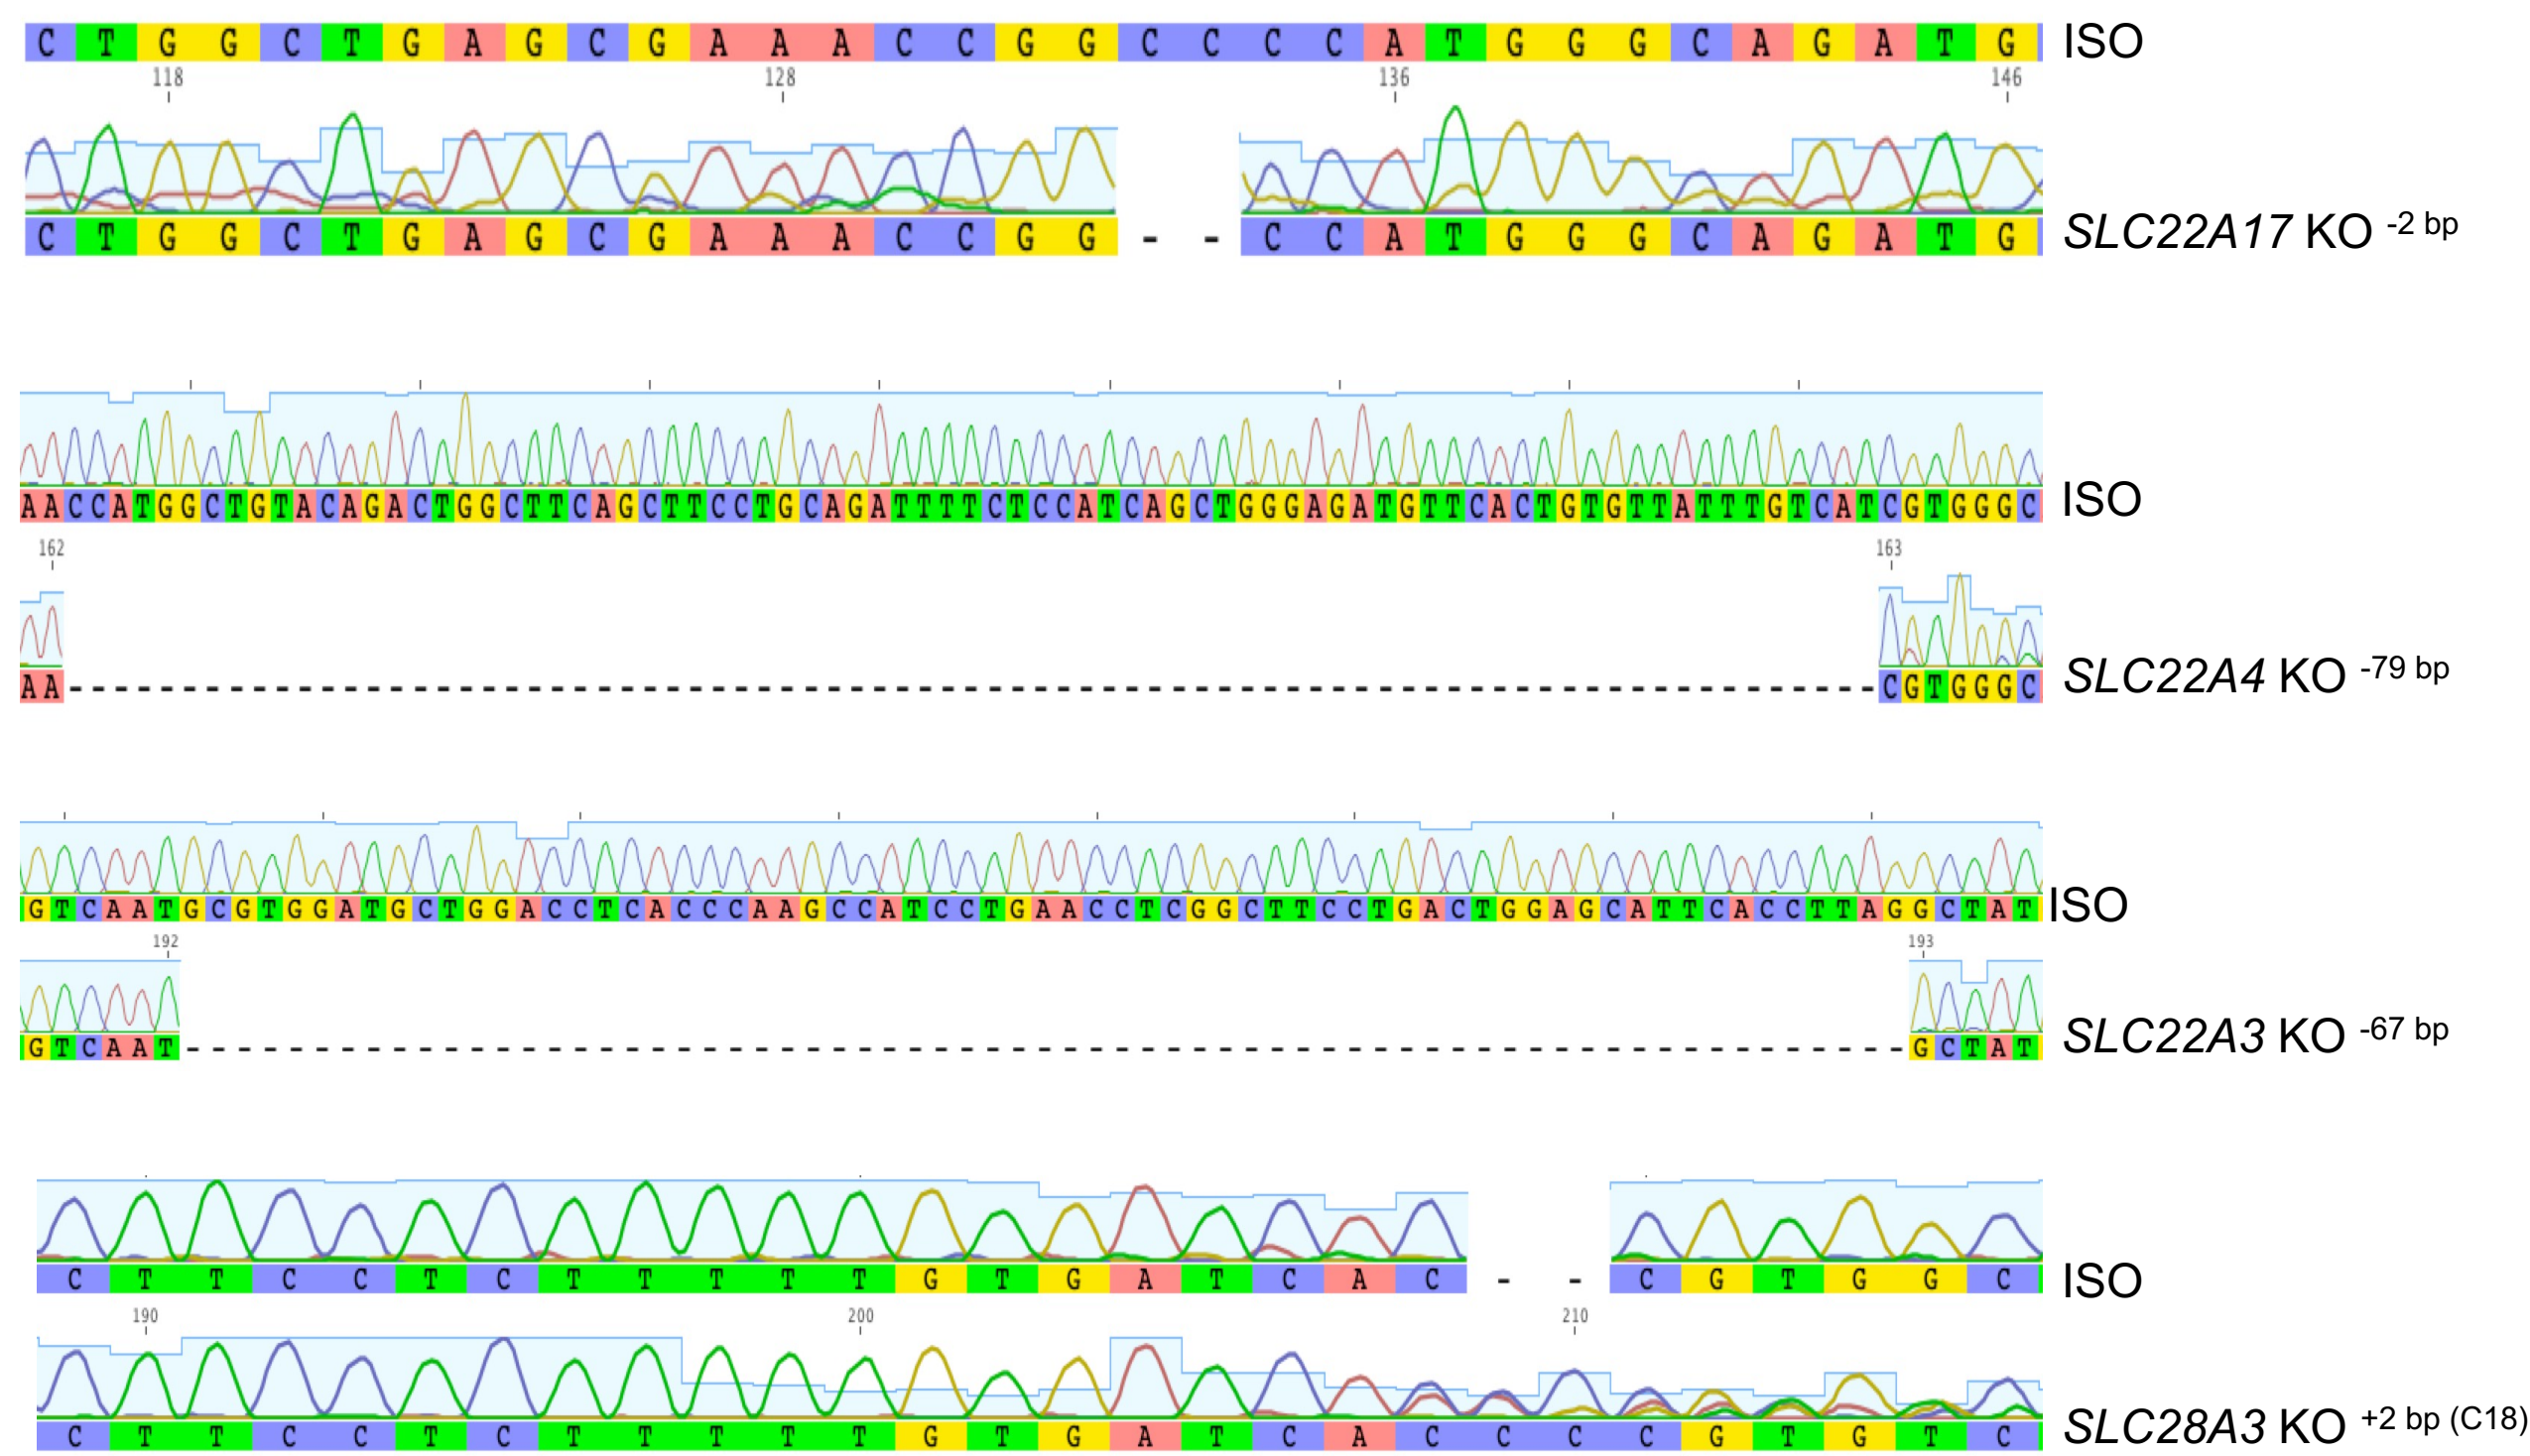

B

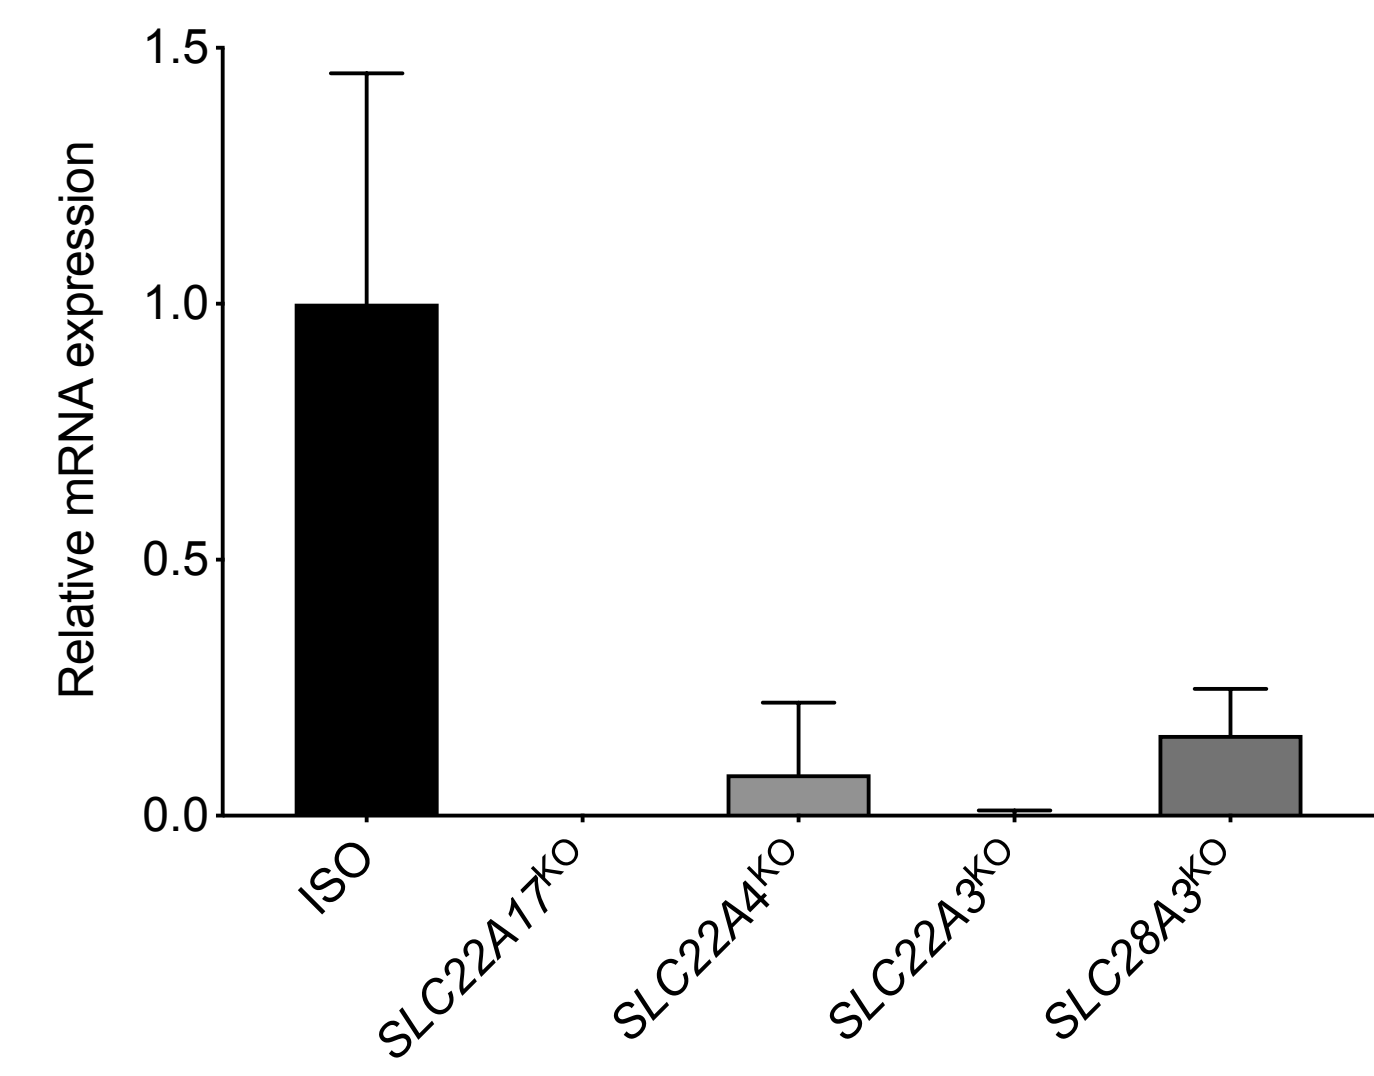

**Supplementary Figure 7. Generation of DOX-relevant SLC transporter knockouts in an isogenic cell line. A,** Validation of SLC transporters knockouts using Sanger sequencing showing disturbance on DNA level at target loci. **B,** and qPCR to quantify the mRNA expression of relevant transporters ( $n = 3$ ).  $n =$  full independent experimental replicates, Error bars, s.e.m.

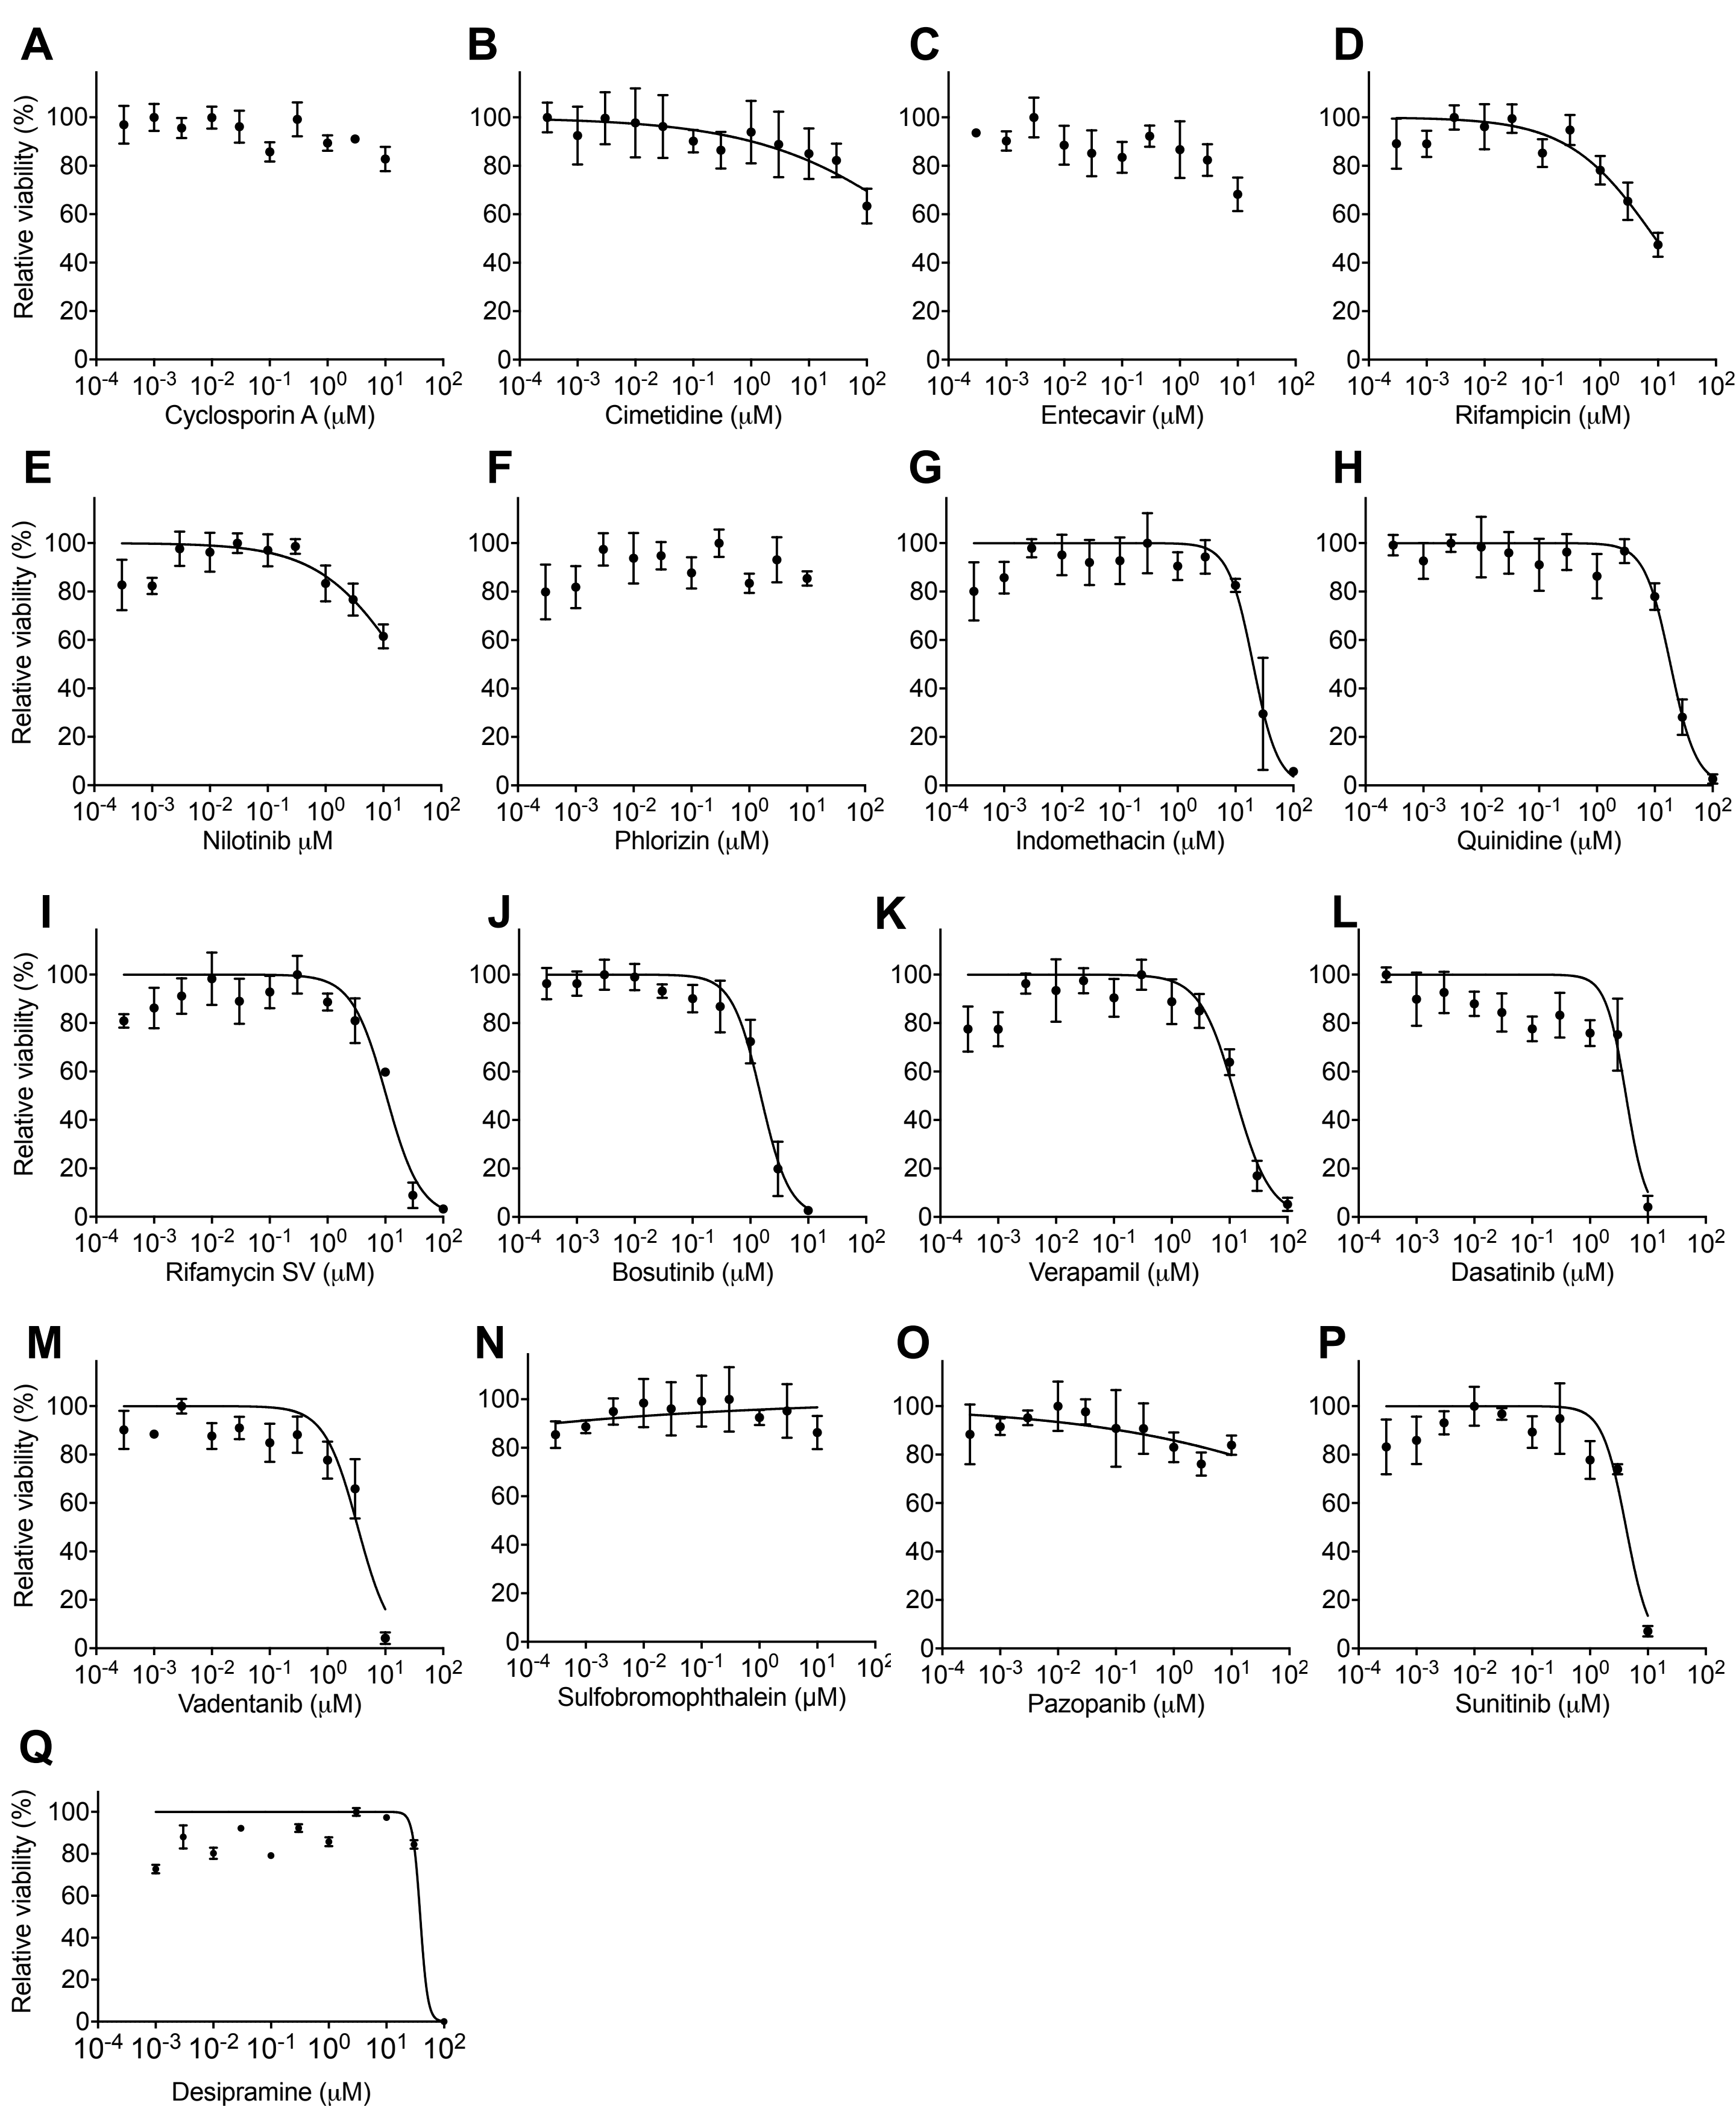

**Supplementary Figure 8. Assessment of the toxicity of the cherry-picked SLC transporter modulators in hiPSC-CMs.** a-q, The effect of 17 different transporter inhibitors on patient derived hiPSC-CMs viability were assessed 72 h post treatment. The drugs assessed were; **A**, cyclosporin A, **B**, cimetidine, **C**, entecavir, **D**, rifampicin, **E**, nilotinib, **F**, phlorizin, **G**, indomethacin, **H**, quinidine, **I**, rifamycin, **J**, verapamil, **K**, bosutinib, **L**, dasatinib, **M**, vadentanib, **N**, pazopanib, **O**, sunitinib, **P**, sulfobromophthalein, and **Q**, desipramine.

**A**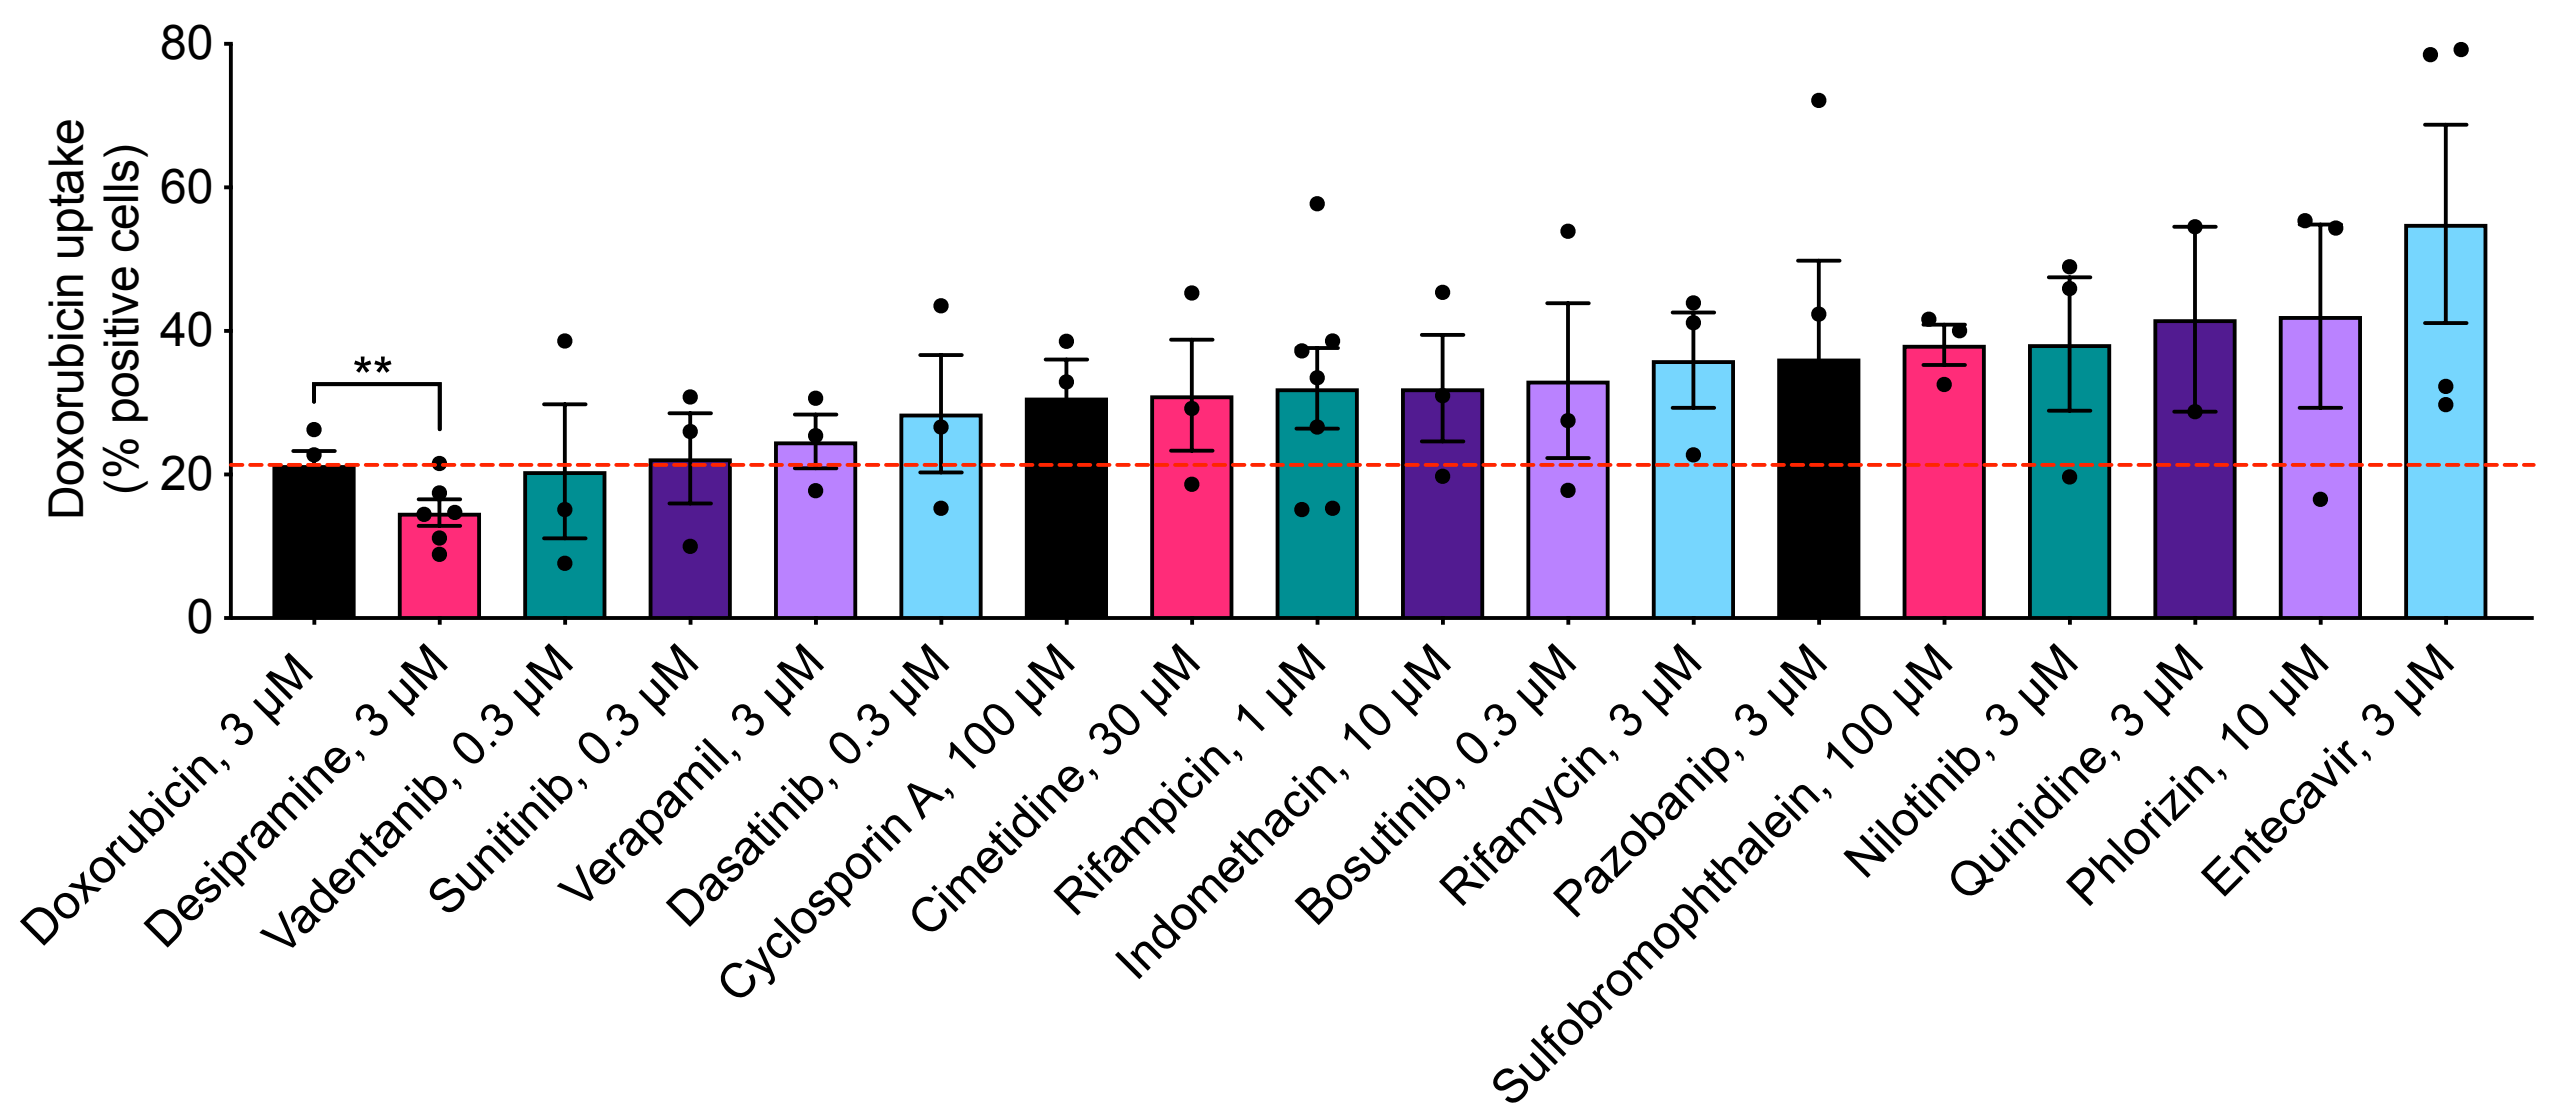**B**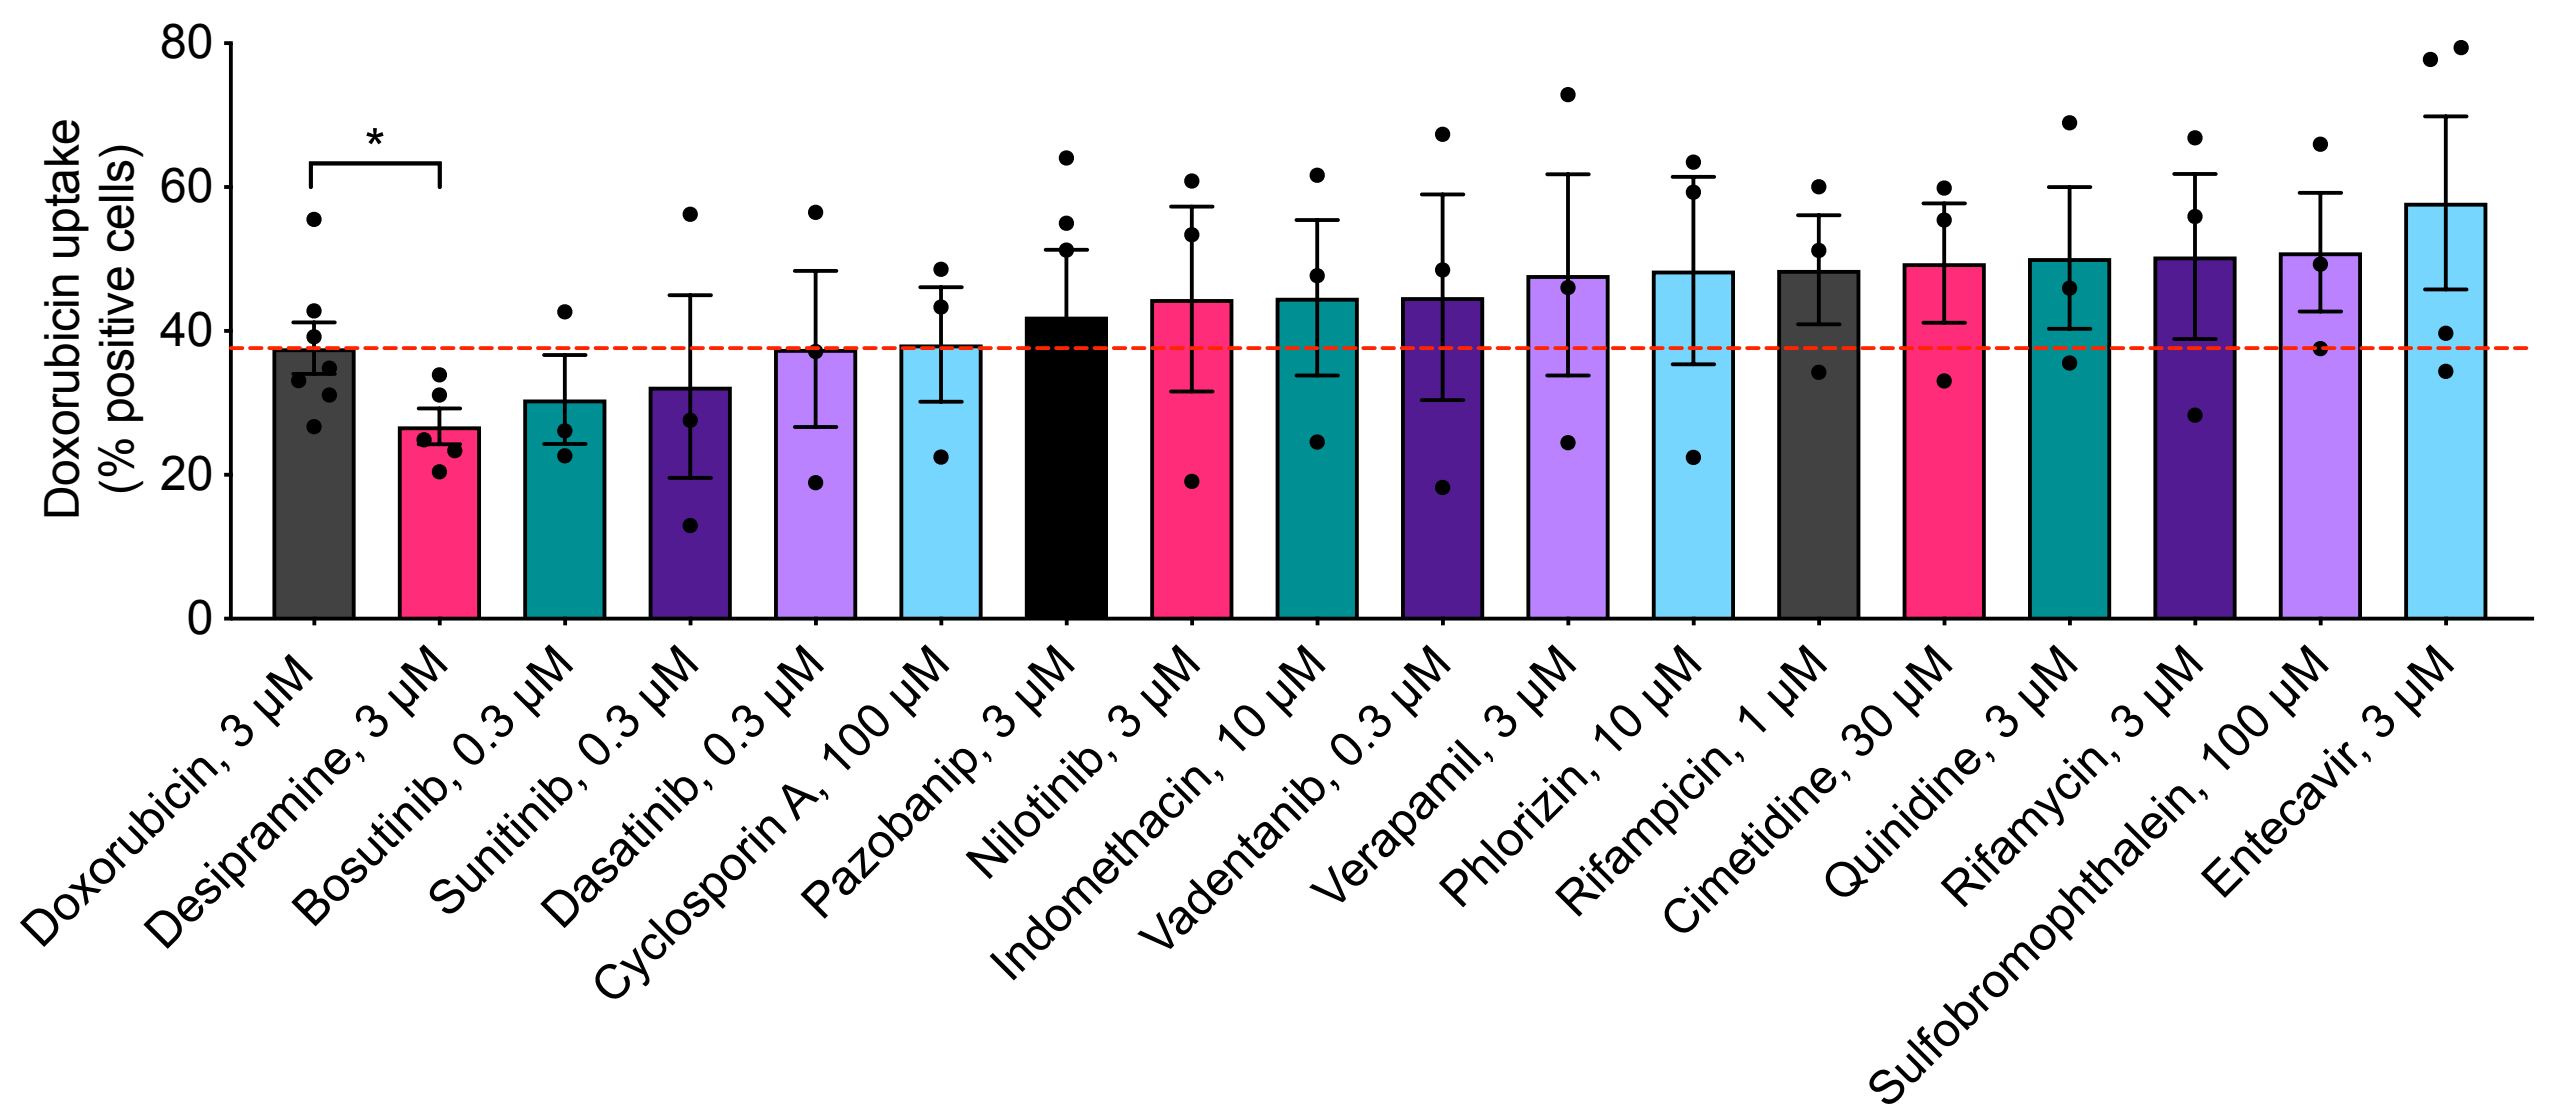**C**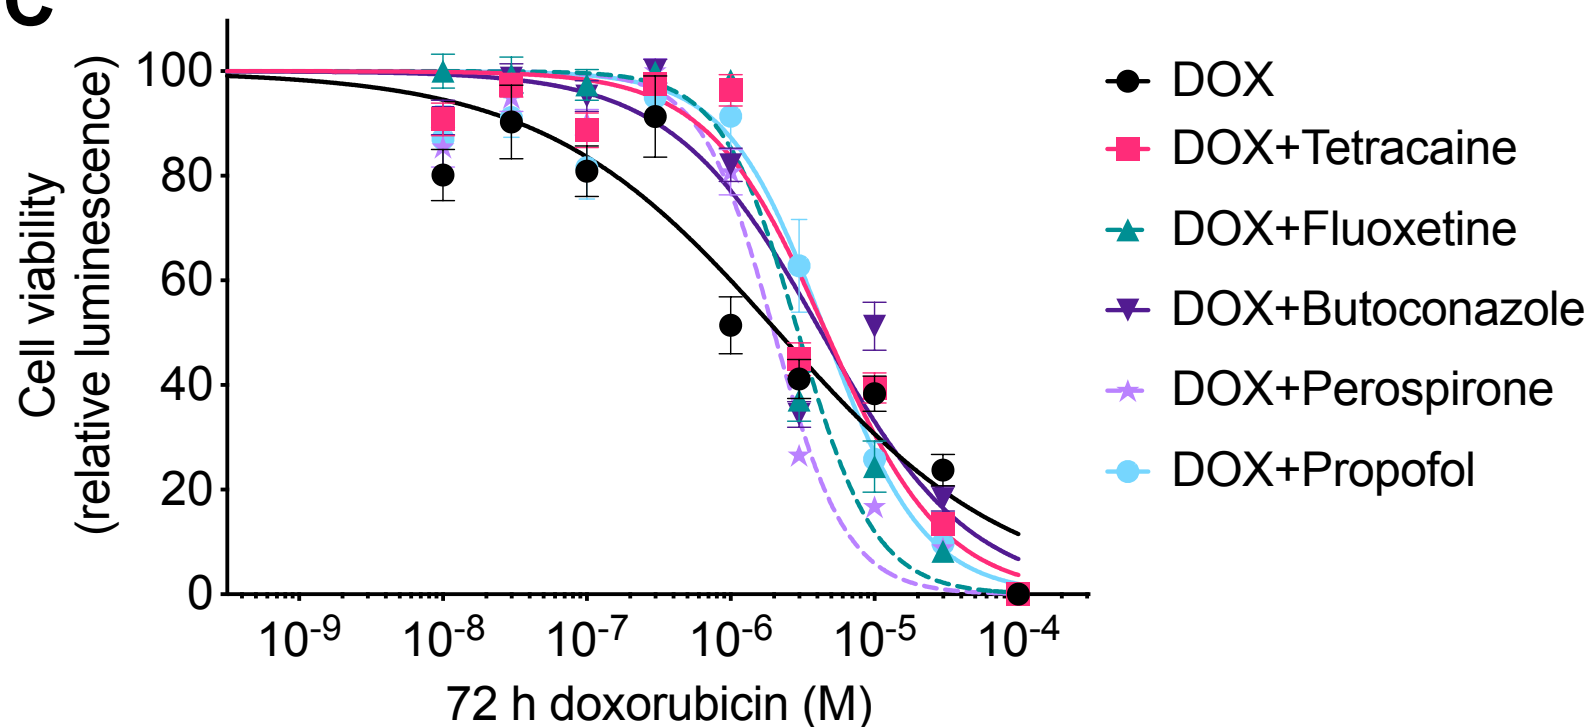

| Treatment          | LD <sub>50</sub> (μM) | P-value |
|--------------------|-----------------------|---------|
| DOX                | 2.35                  | NA      |
| DOX + Perospirone  | 1.98                  | 0.35    |
| DOX + Fluoxetine   | 2.69                  | 0.76    |
| DOX + Butoconazole | 4.40                  | 0.01    |
| DOX + Propofol     | 4.77                  | 0.003   |
| DOX + Tetracaine   | 4.65                  | 0.0007  |
| DOX + Desipramine  | 10.66                 | <0.0001 |

**Supplementary Figure 9. Screening of cherry-pick SLCs modulators in relation to DIC in hiPSC-CMs. A–B,** The effect of 17 SLC transporter modulators on DOX intracellular accumulation in hiPSC-CMs by quantification of DOX intrinsic fluorescence using a flow cytometry-based assay ( $n = 3-6$ ). DOX uptake was quantified 1 h (**A**) and 3 h (**B**) post DOX treatment. **C,** Validation of Prestwick drug library screening-identified top FDA-approved cardioprotectants against 10 log-doses of doxorubicin.  $n =$  full independent experimental replicates, Error bars, s.e.m,  $*P < 0.05$ ,  $**P \leq 0.01$ ,  $***P \leq 0.001$ ,  $****P < 0.0001$  by unpaired two-tailed Student's t-test (**a-b**). For (**c**) log-logistic non-linear regression model was used to estimate the value of the four parameters, and t-statistic was used to test for significant difference in LD<sub>50</sub> between different groups.

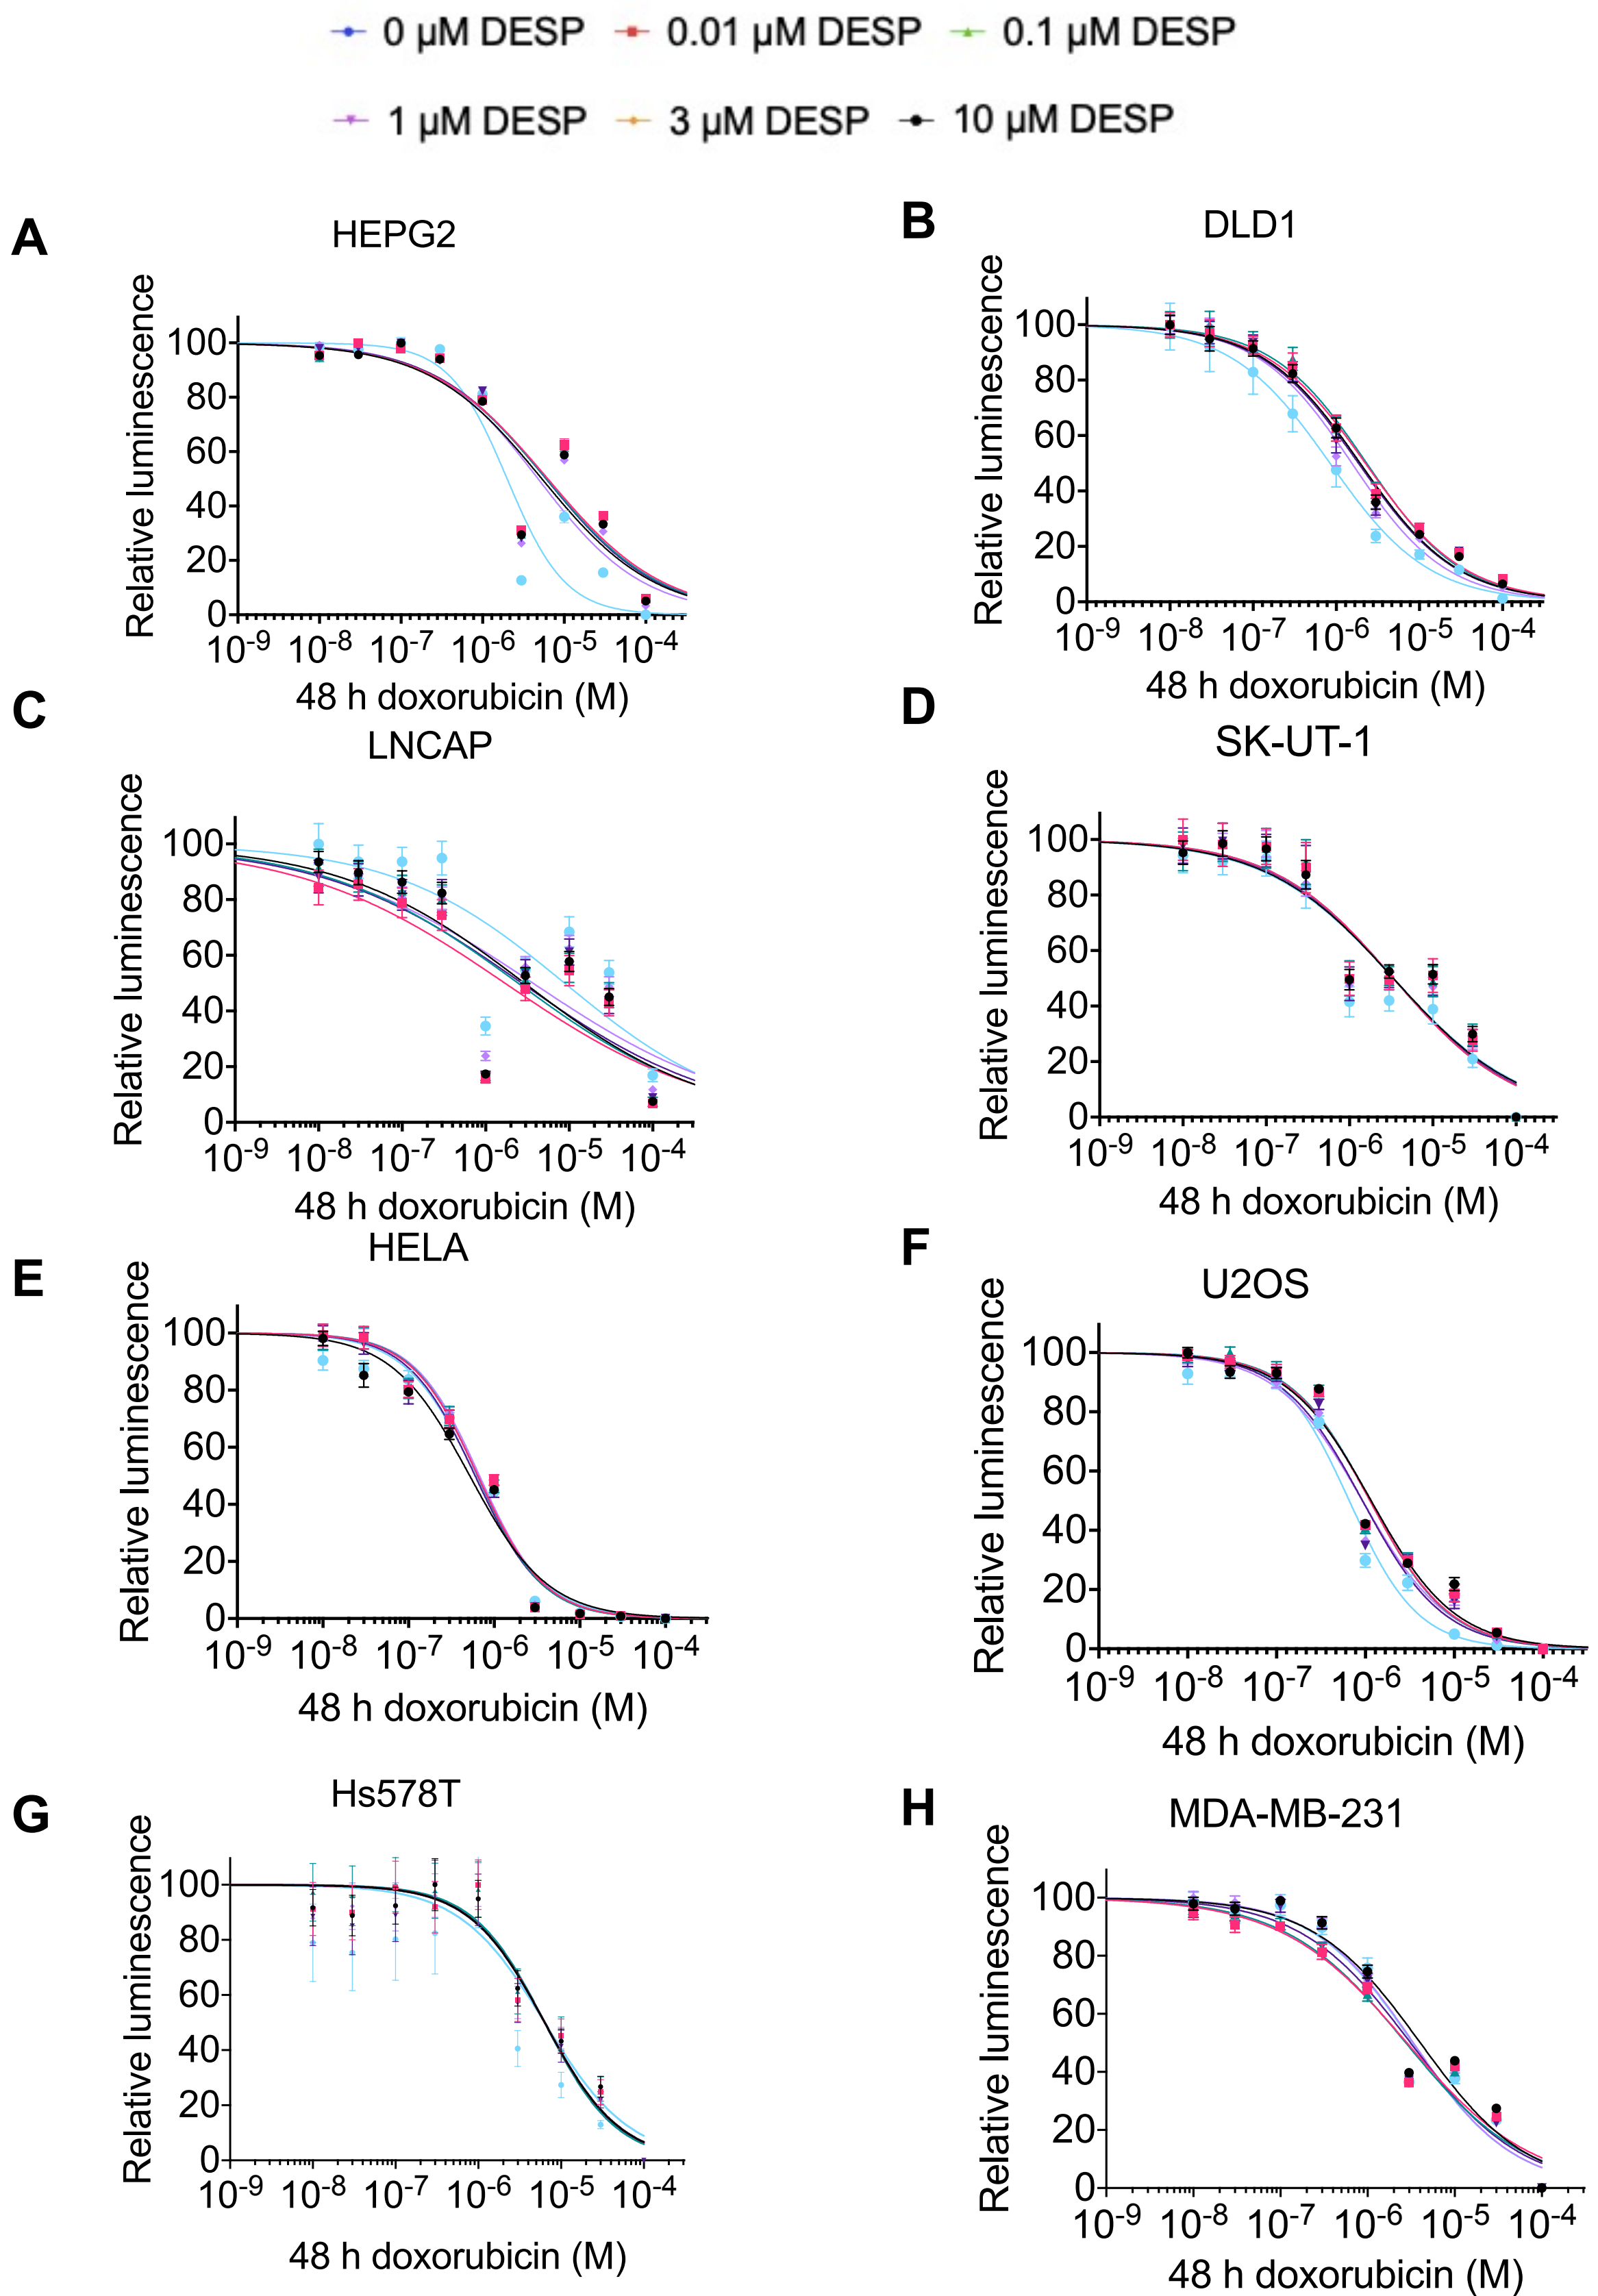

**Supplementary Figure 10. Desipramine does not attenuate doxorubicin cytotoxicity in cancer cell lines.** A-H, Assessment of cell viability after 48 h of doxorubicin and desipramine co-treatment in **A** HEPG2. **B**, DLD1. **C**, LNCAP. **D**, SK-UT-1. **E**, HeLa. **F**, U2OS. **G**, Hs 578T. **H**, and MDA-MB-231 ( $n = 12-20$ ). DESP, desipramine.  $n =$  full independent experimental replicates, Error bars, s.e.m, Log-logistic non-linear regression model was used to estimate the value of the four parameters, and t-statistic was used to test for significant difference in LD<sub>50</sub> between different groups.

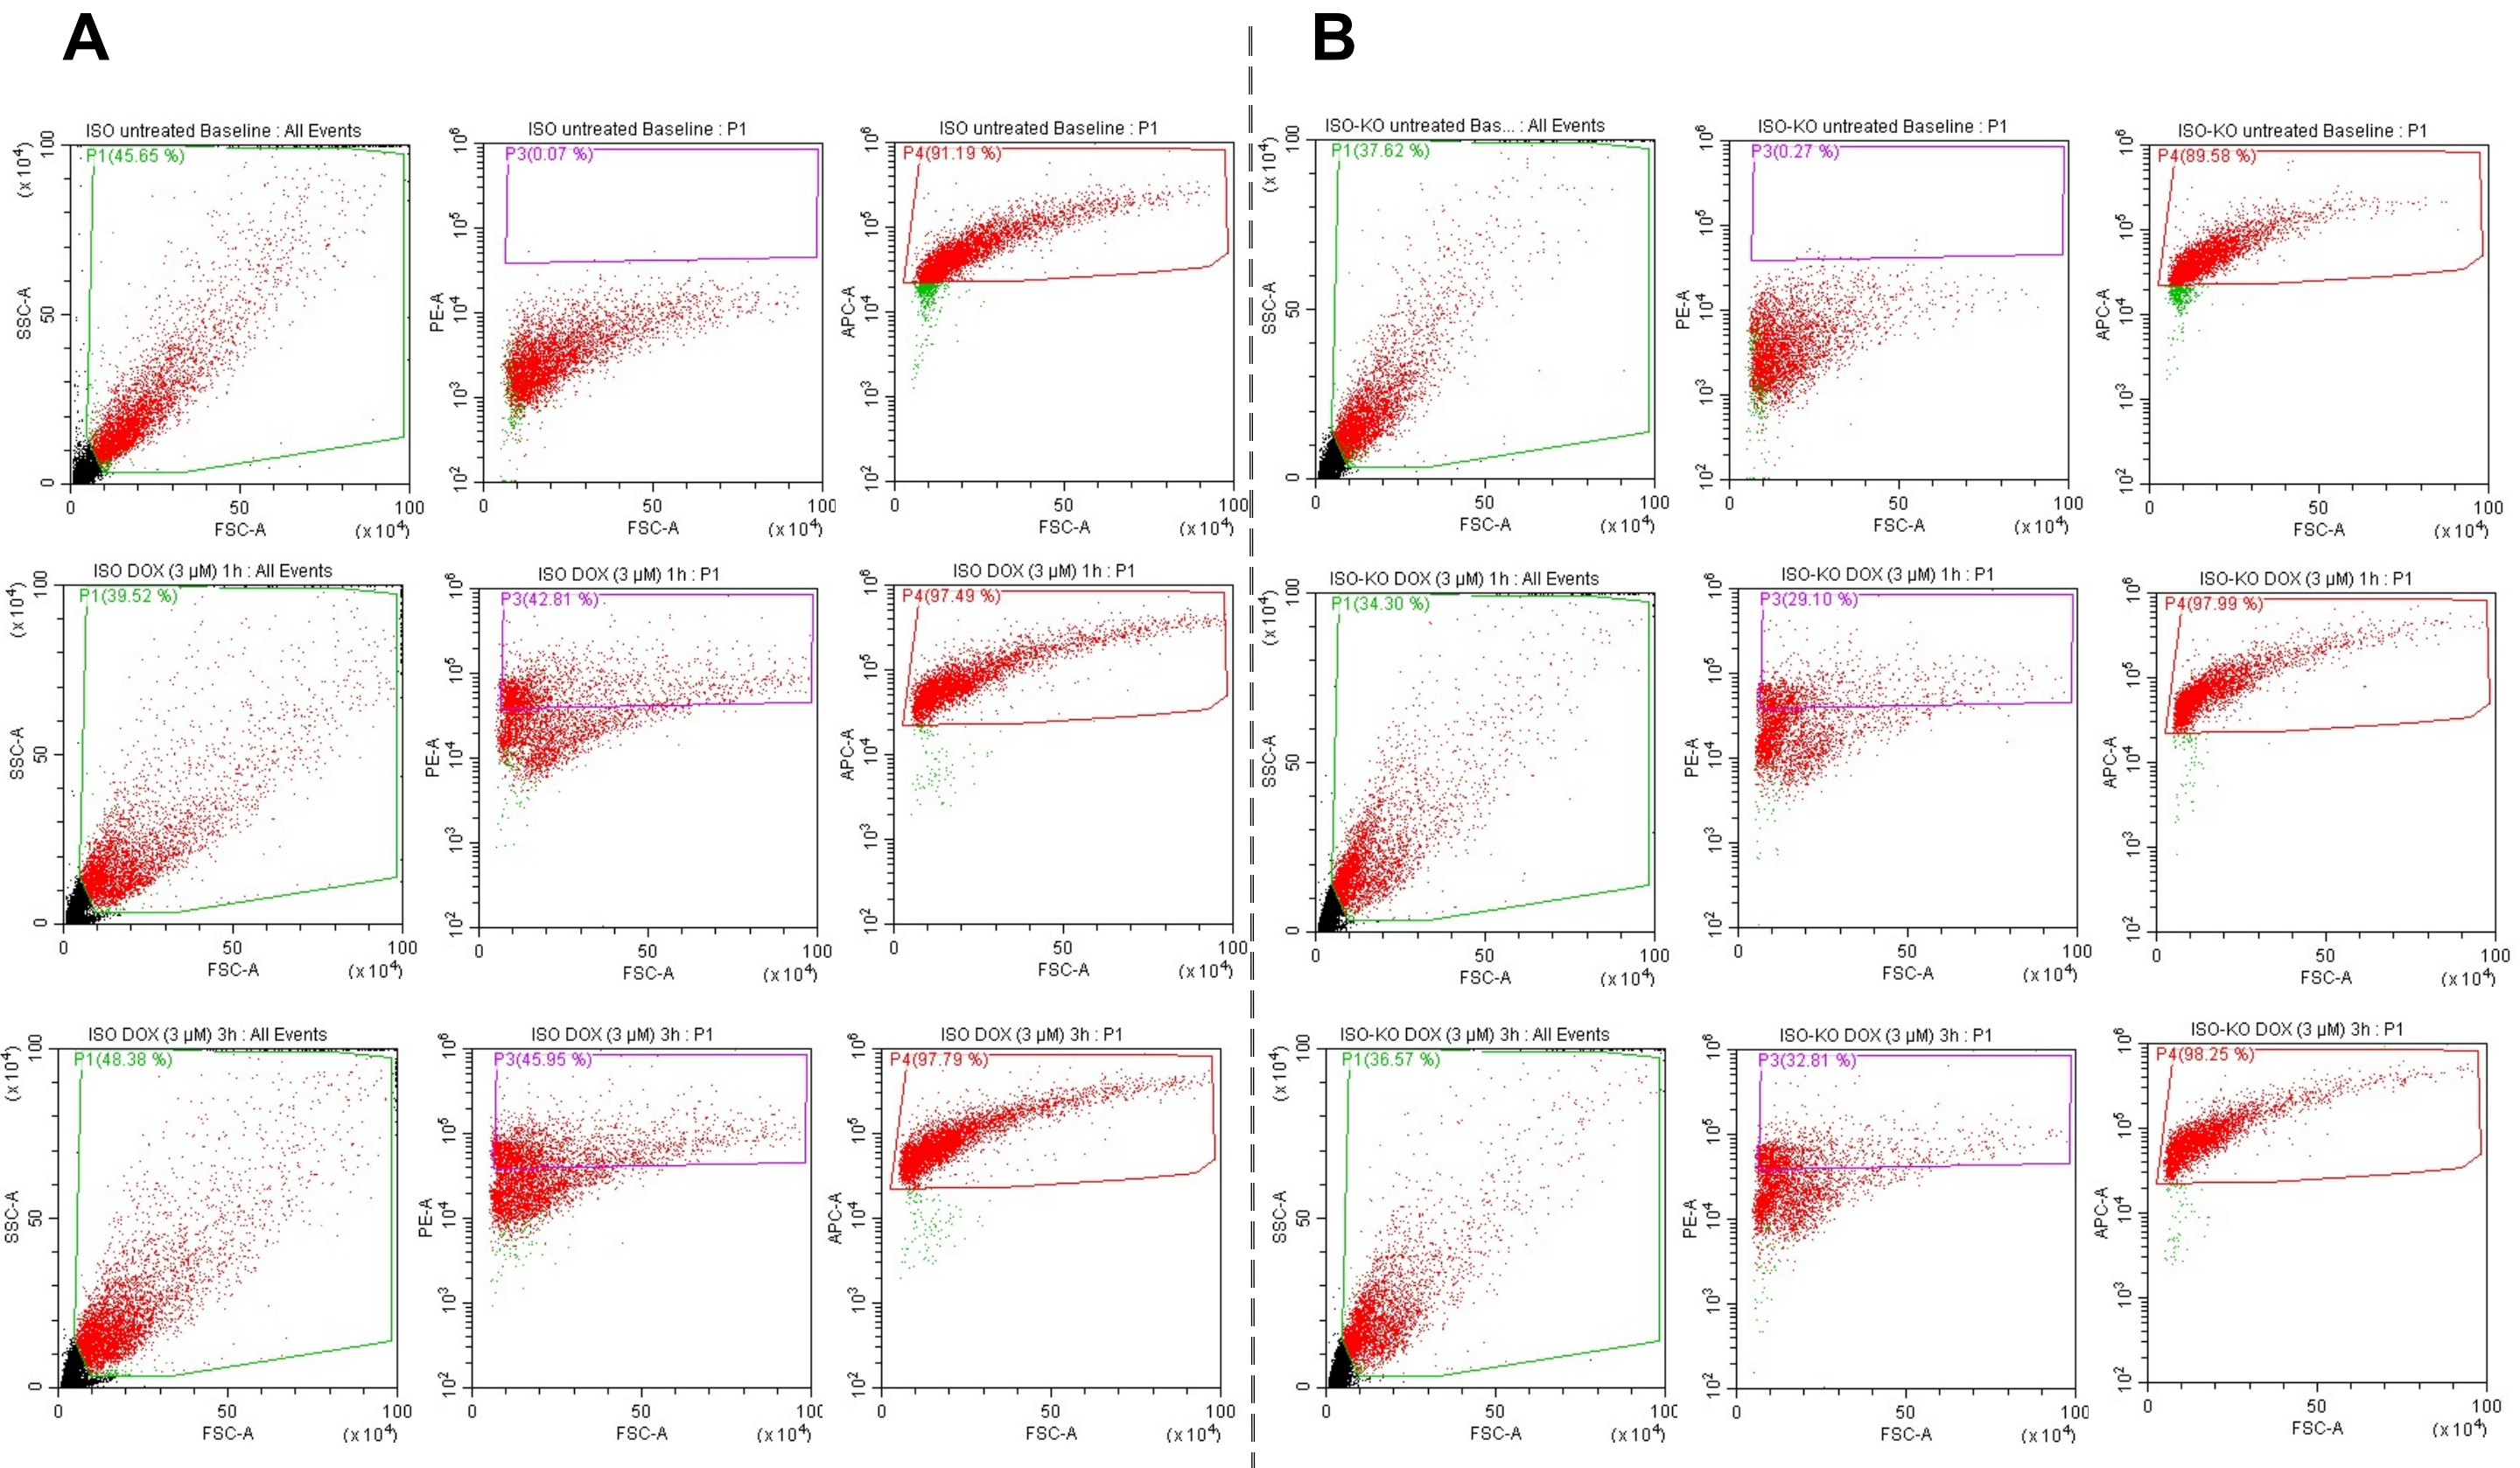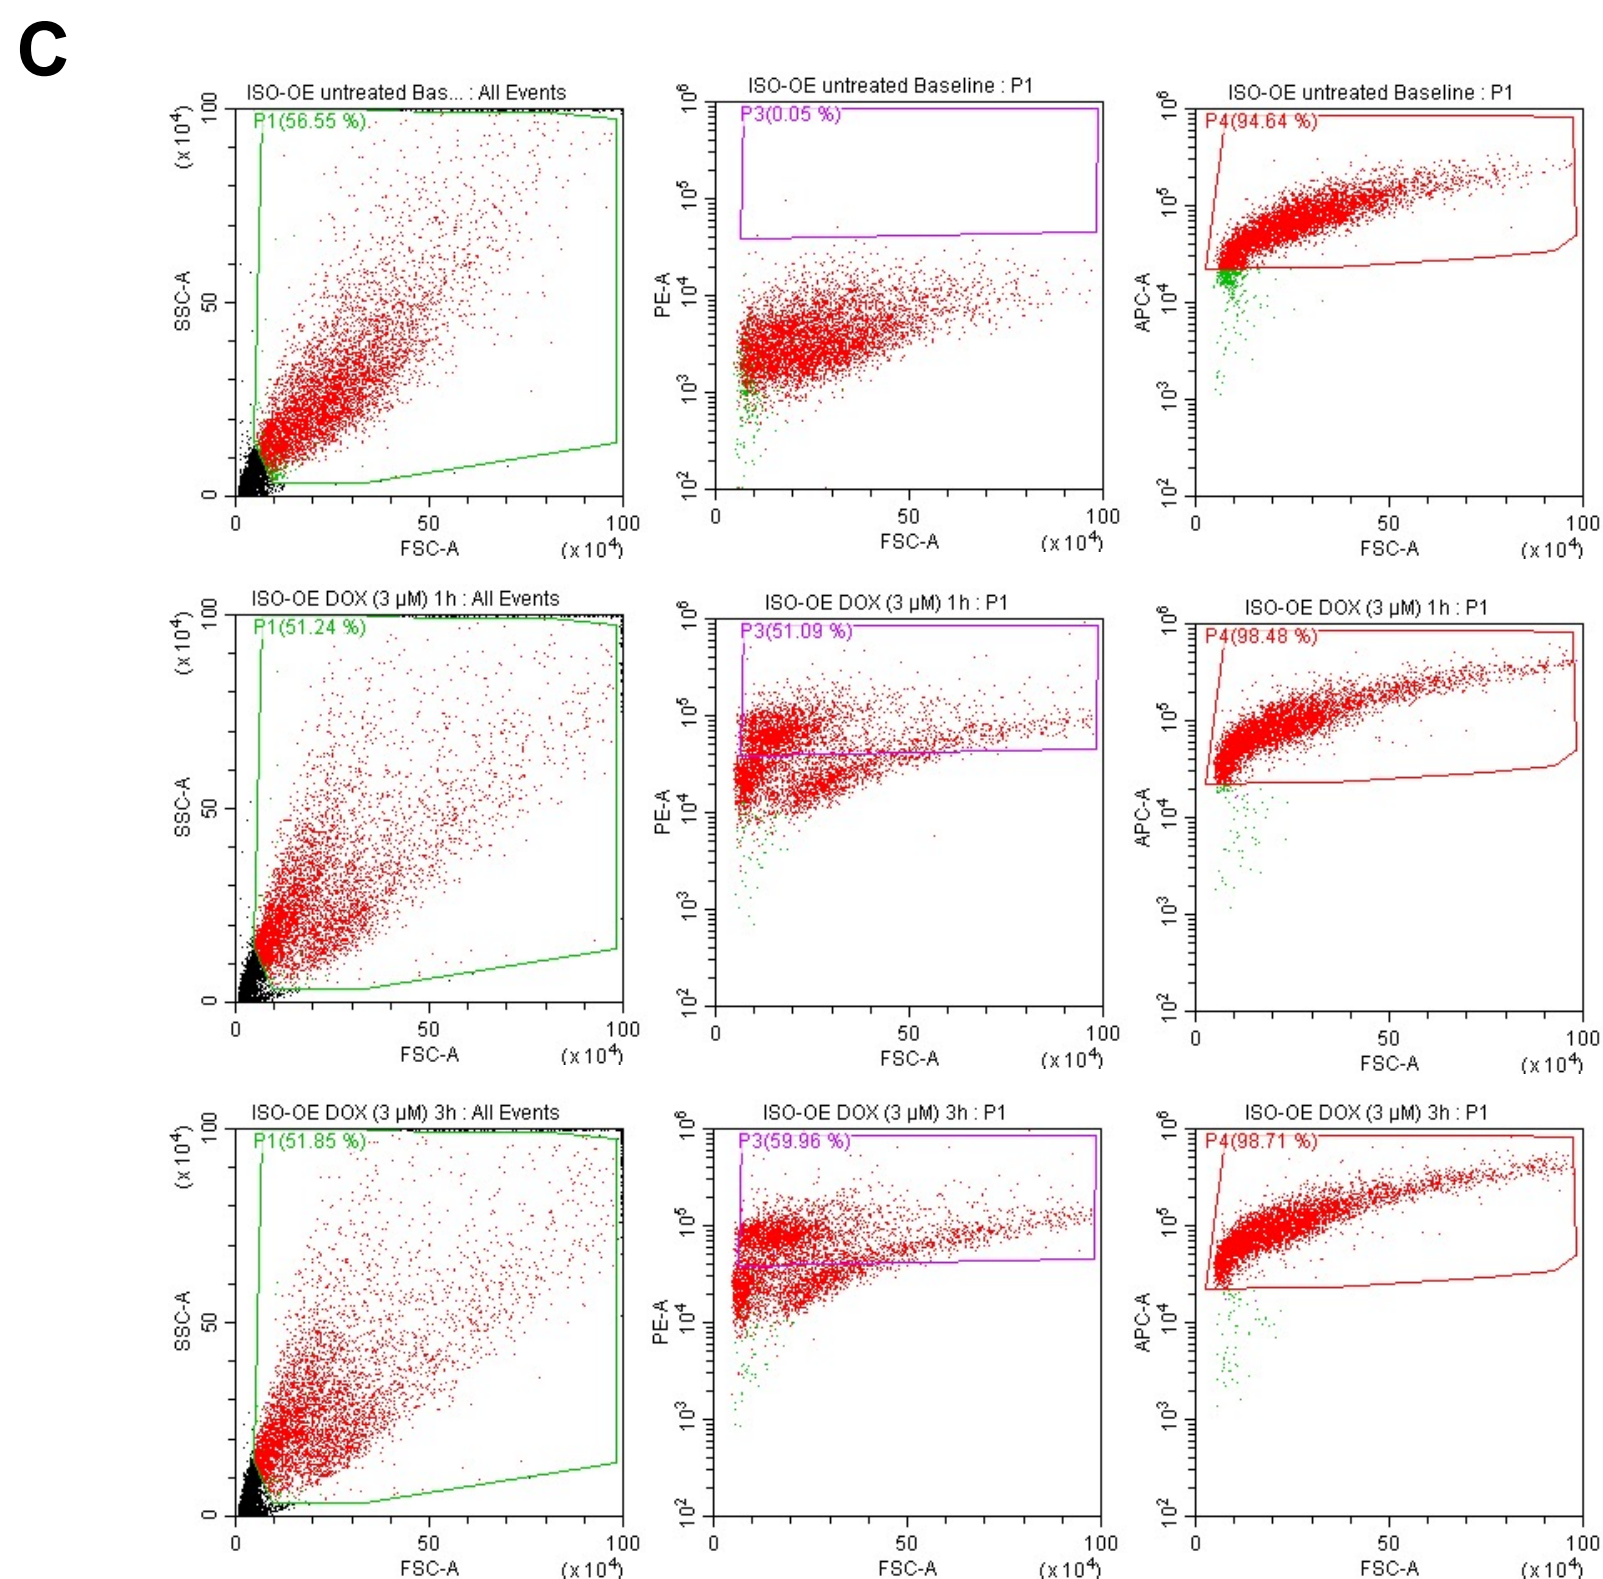

**Supplementary Figure 11. Exemplary flow cytometry plots for DOX uptake in hiPSC-CMs.** Flow cytometry-based DOX uptake quantification in ISO (**A**), ISO-KO (**B**), and ISO-OE (**C**). For each subfigure, the top panel depicts DOX uptake in untreated cells at the baseline; the middle panel depicts DOX uptake 1 h post DOX treatment (3  $\mu$ M); and the bottom panel depicts DOX uptake 3 h post DOX treatment (3  $\mu$ M). P3 denotes DOX uptake (% positive cells) at baseline, 1 h, and 3 h post DOX treatment. P4 denotes live cells (% positive cells) at baseline, 1 h, and 3 h post DOX treatment.

**A**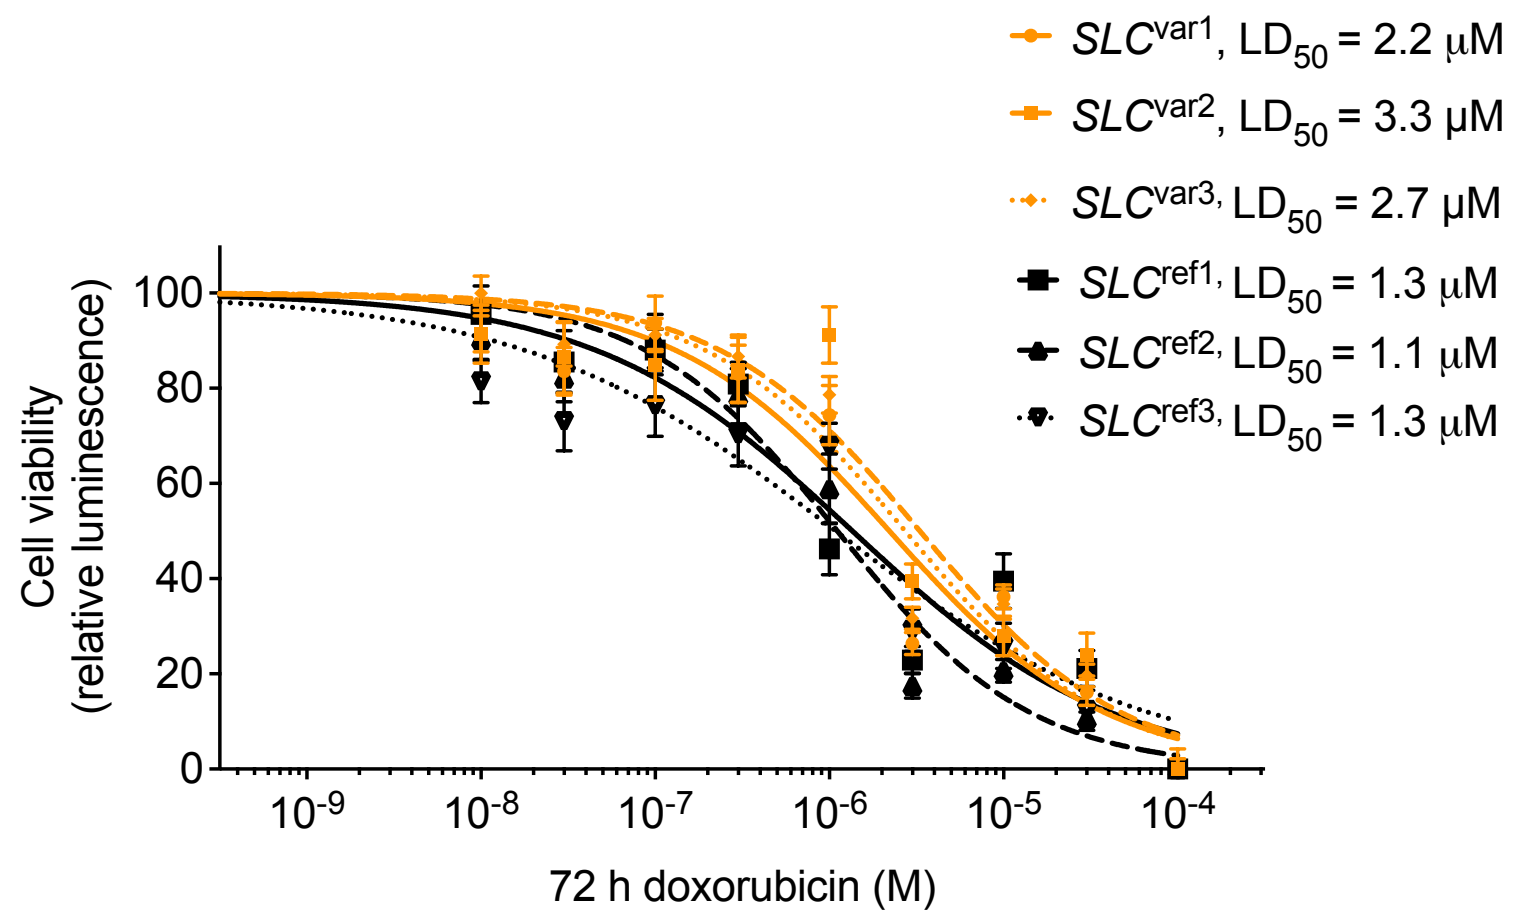**B**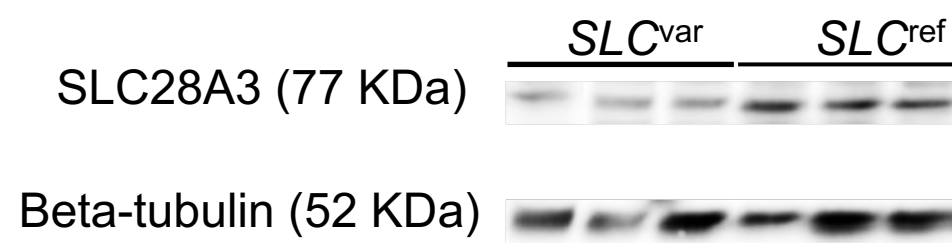**C**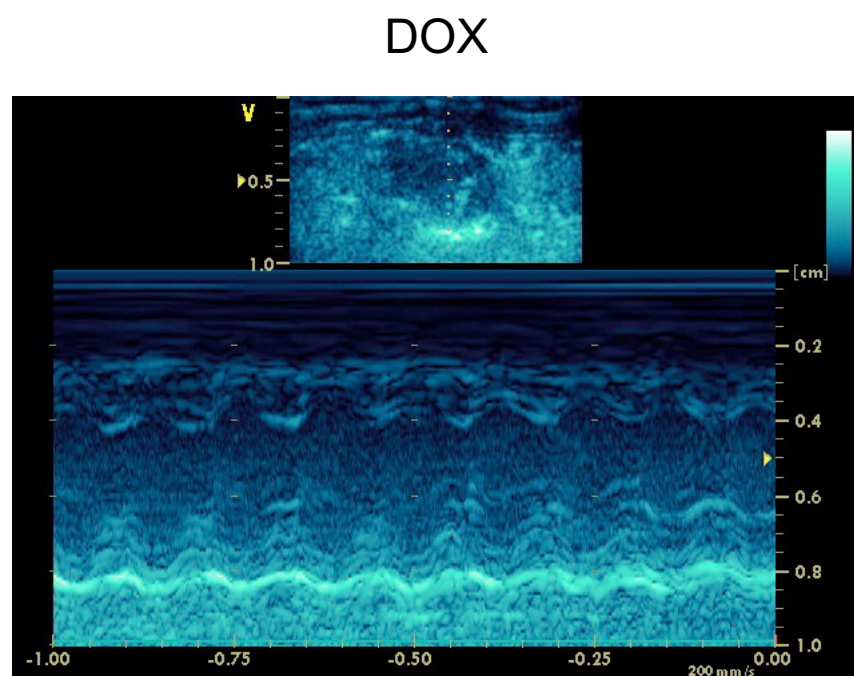**D**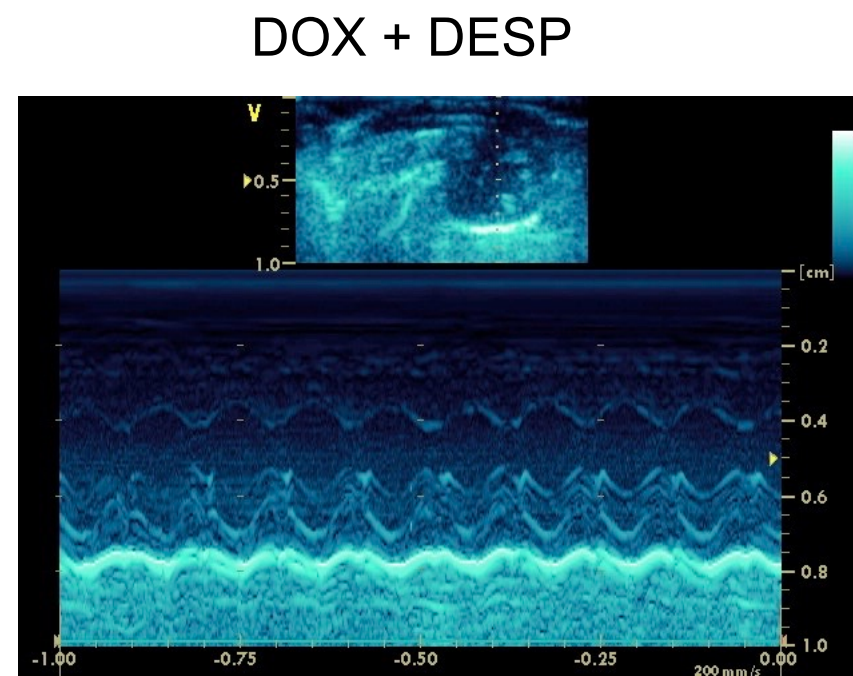

**Supplementary Figure 12. Effect of doxorubicin treatment in hiPSC-CMs and mice. A,** Comparison of hiPSC-CMs derived from three patients harboring the heterozygous rs7853758 variant and were protected from DIC after DOX treatment ( $SLC^{var1}$  ( $n = 37$ ),  $SLC^{var2}$  ( $n = 26$ ),  $SLC^{var3}$  ( $n = 63$ ); collectively  $SLC^{var}$ ), to hiPSC-CMs from three control patients who did not carry this protective SNP and developed DIC upon same DOX treatment ( $SLC^{ref1}$  ( $n = 30$ ),  $SLC^{ref2}$  ( $n = 29$ ),  $SLC^{ref3}$  ( $n = 22$ ); collectively  $SLC^{ref}$ ). **B,** Western blot showing SLC28A3 expression in  $SLC^{ref}$  ( $n = 3$ ), and  $SLC^{var}$  ( $n = 3$ ) hiPSC-CMs. **C-D,** representative echocardiography images for m hearts after 3 weeks of doxorubicin treatment (3 mg/kg, ip,  $n = 10$ ) compared co-treatment ( $n = 8$ ) of desipramine (20 mg/kg/day, Alzet pump) and doxorubicin (3 mg/kg, ip) showing an increased end-systolic dimension in the Dox group when compared to DOX+DESP group.  $n =$  full independent experimental replicates, Error bars, s.e.m,  $*P < 0.05$ ,
